# Supplementary material for: Axonal distribution of mitochondria maintains neuronal autophagy during aging via eIF2β
Source: eLife. 2026 Jan 26;13:RP95576. doi: 10.7554/eLife.95576 (PMC12834499; doi:10.7554/eLife.95576)
Supplement: Supplementary file 1. [file elife-95576-supp1.xlsx]

## Sheet: S1
Proteins detected by liquid chromatography-tandem mass spectrometry (LC-MS/MS)
Protein FDR Confidence: Combined	Accession	Description	Sum PEP Score	Coverage [%]	# Peptides	# PSMs	# Unique Peptides	Gene Symbol	Abundance Ratio: (7 days, Milton KD) / (7 days, Control)	Abundance Ratio: (21 days, Milton KD) / (21 days, Control)	Abundance Ratio P-Value: (7 days, Milton KD) / (7 days, Control)	Abundance Ratio P-Value: (21 days, Milton KD) / (21 days, Control)	Abundances (Grouped): 7 days, Control	Abundances (Grouped): 7 days, Milton KD	Abundances (Grouped): 21 days, Control	Abundances (Grouped): 21 days, Milton KD	Acetyl (N-term) Count	Acetyl (N-term) Positions	Phospho (S; T; Y) Count	Phospho (S; T; Y) Positions
High	P91622	[Pyruvate dehydrogenase (acetyl-transferring)] kinase, mitochondrial	11.858	9	3	4	3	Pdk	0.752	0.979	0.060501	0.860035	82.1	87	120.7	110.2	0		0
High	Q6AWN0	1,2-dihydroxy-3-keto-5-methylthiopentene dioxygenase	46.928	53	8	52	8	Adi1	0.957	1.033	0.79365	0.79434	113	109.8	87.1	90.2	0		0
High	P29310	14-3-3 protein zeta	144.603	61	12	641	1	14-3-3zeta	0.958	0.967	0.800046	0.776543	87.8	80.9	115.9	115.4	0		0
High	P13217	1-phosphatidylinositol 4,5-bisphosphate phosphodiesterase	276.937	40	40	699	40	norpA	1.023	1.034	0.721735	0.789778	91.1	90.8	107.8	110.3	0		0
High	P23226	205 kDa microtubule-associated protein	20.226	4	3	20	3	Map205	1.464	1.091	0.00279046	0.481931	108.5	147.3	47.1	97.1	0		0
High	Q9V3P6	26S proteasome non-ATPase regulatory subunit 1	63.638	14	10	70	10	Rpn2	0.985	1.007	0.991461	0.958119	99.3	98.5	98.9	103.3	0		0
High	Q7KLV9	26S proteasome non-ATPase regulatory subunit 11	56.101	35	11	84	11	Rpn6	0.964	1.008	0.846496	0.951557	122.3	115.7	85.2	76.7	0		0
High	Q9V3H2	26S proteasome non-ATPase regulatory subunit 14	12.505	9	3	47	3	Rpn11	1.067	1.034	0.522763	0.792972	107.3	113	89.1	90.7	0		0
High	P55035	26S proteasome non-ATPase regulatory subunit 4	14.833	7	2	22	2	Rpn10	0.487	1.008	5.50158e-11	0.953383	106	75.6	112	106.4	0		0
High	Q9V3G7	26S proteasome non-ATPase regulatory subunit 6	44.49	22	7	70	7	Rpn7	0.824	1.033	0.0988496	0.794065	115.8	98.6	89.4	96.2	0		0
High	P26270	26S proteasome non-ATPase regulatory subunit 7	43.698	21	4	60	4	Rpn8	0.779	1.079	0.030839	0.540113	138.8	107.9	83.3	70	0		0
High	Q9VFS8	26S proteasome non-ATPase regulatory subunit 9	2.857	5	1	2	1		0.96	0.741	0.948333	0.0141284	128.6	122.9	85.6	62.9	0		0
High	P48601	26S proteasome regulatory subunit 4	42.386	23	7	46	6	Rpt2	0.955	0.984	0.780565	0.891374	100.2	95.8	102.9	101.1	0		0
High	O18413	26S proteasome regulatory subunit 8	37.737	19	6	72	5	Rpt6	0.994	1.108	0.92698	0.40576	97.3	114.1	84.7	103.9	0		0
High	P54397	39 kDa FK506-binding nuclear protein	5.293	5	2	6	2	Fkbp39	1.184	0.883	0.217064	0.307049	83.3	96.4	117	103.4	0		0
Medium	Q9VHN6	39S ribosomal protein L19, mitochondrial	1.528	7	1	1	1	mRpL19	0.487	0.561	0.000551337	2.45669e-06	132.3	75.7	123	69	0		0
Medium	Q9VMX0	39S ribosomal protein L28, mitochondrial	2.059	3	1	11	1	mRpL28	1.186	0.951	0.273047	0.67936	117.4	137.2	74.3	71.1	0		0
High	Q9V9Z1	39S ribosomal protein L32, mitochondrial	2.818	5	1	2	1	mRpL32	0.86	0.814	0.512953	0.0926813	92	79.7	118.3	109.9	0		0
High	Q9VF89	39S ribosomal protein L9, mitochondrial	5.079	5	1	5	1	mRpL9	1.029	1.144	0.765616	0.275864	97.7	99.2	94.7	108.3	0		0
High	O18404	3-hydroxyacyl-CoA dehydrogenase type-2	130.7	81	16	339	16	scu	0.932	0.943	0.614046	0.625009	93.5	86.8	113.2	106.4	0		0
High	Q9VWG3	40S ribosomal protein S10b	63.294	58	9	178	9	RpS10b	0.978	0.824	0.956997	0.114157	115.5	111.4	94.1	79.1	0		0
High	Q0E9B6	40S ribosomal protein S11	33.877	38	8	122	8	RpS11	1.004	0.862	0.852625	0.225397	109.6	117.7	97.4	75.3	0		0
High	P80455	40S ribosomal protein S12	109.205	68	10	230	10	RpS12	0.813	0.864	0.0756494	0.231293	113.6	99.2	99.3	87.8	0		0
High	Q03334	40S ribosomal protein S13	26.861	45	8	102	8	RpS13	0.941	0.826	0.677216	0.117442	111.3	110.3	98.5	79.9	0		0
High	C0HKA1	40S ribosomal protein S14b	41.367	32	5	142	5	RpS14b	1.134	0.877	0.188348	0.28159	113.1	126.9	85.8	74.3	0		0
High	P48149	40S ribosomal protein S15Aa	37.58	44	6	141	6	RpS15Aa	0.983	0.874	0.992663	0.269891	113.9	110.7	94.6	80.8	0		0
High	Q9W237	40S ribosomal protein S16	59.721	65	13	217	13	RpS16	1.036	0.866	0.631526	0.239646	108.8	114.8	94.8	81.6	0		0
High	P17704	40S ribosomal protein S17	88.413	67	10	257	10	RpS17	1.024	0.909	0.713626	0.43518	112.9	116.5	89.7	80.9	0		0
High	P41094	40S ribosomal protein S18	59.827	58	15	232	15	RpS18	1.006	0.808	0.835838	0.0804268	99.9	93.3	116.6	90.2	0		0
High	P39018	40S ribosomal protein S19a	57.625	55	12	217	12	RpS19a	0.992	0.86	0.942759	0.215157	115.3	112.6	90.3	81.8	0		0
High	P31009	40S ribosomal protein S2	51.749	39	9	153	9	RpS2	0.865	0.867	0.229131	0.241285	122.8	113.1	88.4	75.7	0		0
High	P55828	40S ribosomal protein S20	39.677	28	3	133	3	RpS20	0.965	0.811	0.851148	0.086681	118.1	113	94.2	74.7	0		0
High	O76927	40S ribosomal protein S21	45.185	63	4	51	4	RpS21	0.823	0.825	0.0954956	0.116264	139.7	111.4	81	67.9	1	Acetyl [N-Term]	0
High	Q8T3U2	40S ribosomal protein S23	46.607	43	6	120	6	RpS23	0.924	0.929	0.554008	0.542832	112	104.5	94.2	89.3	0		0
High	P48588	40S ribosomal protein S25	36.976	34	5	158	5	RpS25	1.073	0.864	0.420704	0.232248	109.6	116.9	93.3	80.1	0		0
High	P13008	40S ribosomal protein S26	23.046	38	4	72	4	RpS26	1.058	0.851	0.499688	0.187325	106.5	113.8	90.4	89.3	0		0
High	Q9W334	40S ribosomal protein S28	22.669	63	4	79	4	RpS28b	0.969	0.81	0.886777	0.0846171	116.9	106.1	97.8	79.3	1	Acetyl [N-Term]	0
High	Q9VH69	40S ribosomal protein S29	5.041	29	2	32	2	RpS29	1.01	0.827	0.810261	0.120214	115	115.9	93.8	75.3	0		0
High	Q06559	40S ribosomal protein S3	78.047	57	13	320	13	RpS3	1.081	0.839	0.383323	0.15041	107.2	121.6	94.1	77.1	0		0
High	P55830	40S ribosomal protein S3a	127.694	66	19	382	19	RpS3A	0.964	0.849	0.845717	0.179451	115.1	111.6	91.6	81.7	0		0
High	P41042	40S ribosomal protein S4	87.015	52	15	319	15	RpS4	0.958	0.885	0.80284	0.316929	118.5	112.3	89.9	79.3	0		0
High	Q24186	40S ribosomal protein S5a	58.119	40	10	177	10	RpS5a	0.863	0.866	0.220101	0.240091	119.6	104.4	94.4	81.6	0		0
High	P29327	40S ribosomal protein S6	47.292	33	9	130	9	RpS6	0.939	0.857	0.662832	0.20583	102	102.4	106.2	89.5	0		0
High	Q9VA91	40S ribosomal protein S7	97.824	56	12	257	12	RpS7	0.998	0.887	0.895043	0.324456	113.4	111.8	91.9	82.9	0		0
High	Q8MLY8	40S ribosomal protein S8	95.173	54	11	209	11	RpS8	0.914	0.853	0.493209	0.194065	119.1	111	92.2	77.7	0		0
High	P55935	40S ribosomal protein S9	60.237	54	16	321	16	RpS9	1.003	0.848	0.856625	0.175732	108.8	110.2	97.6	83.5	0		0
High	P38979	40S ribosomal protein SA	122.039	66	12	250	12	sta	0.941	0.841	0.676719	0.157498	123.3	111.5	88.4	76.8	0		0
High	P19889	60S acidic ribosomal protein P0	129.288	48	12	323	12	RpLP0	0.948	0.835	0.72839	0.139758	109.8	104.4	104.3	81.5	0		0
High	P08570	60S acidic ribosomal protein P1	85.738	71	4	150	4	RpLP1	0.964	0.858	0.849056	0.211104	120.1	108.2	92.8	78.8	0		0
High	P05389	60S acidic ribosomal protein P2	34.867	54	4	103	4	RpLP2	1.042	0.855	0.592824	0.19993	119	115.9	88.9	76.2	0		0
High	O61231	60S ribosomal protein L10	51.718	36	7	156	7	RpL10	0.944	0.871	0.694904	0.257666	121.7	115.5	88.3	74.5	0		0
High	Q9VTP4	60S ribosomal protein L10a-2	53.96	35	8	133	8	RpL10Ab	0.92	0.833	0.532724	0.133819	116.1	107.6	96.3	80	0		0
High	P46222	60S ribosomal protein L11	22.033	26	5	76	5	RpL11	1.065	0.87	0.462883	0.251967	107.5	109.3	97.7	85.5	0		0
High	P41126	60S ribosomal protein L13	51.161	39	12	224	12	RpL13	1.007	0.835	0.827513	0.139371	103.1	105.2	106	85.7	0		0
High	Q9VNE9	60S ribosomal protein L13a	65.308	46	12	184	12	RpL13A	1.014	0.87	0.780562	0.253659	114.1	118	89.6	78.3	0		0
High	P55841	60S ribosomal protein L14	34.154	36	7	121	7	RpL14	1.139	0.881	0.174662	0.300739	105.6	106.2	100.5	87.8	0		0
High	O17445	60S ribosomal protein L15	49.896	40	8	112	8	RpL15	1.083	0.921	0.373315	0.499999	109	118.6	85.2	87.1	0		0
High	Q9W3W8	60S ribosomal protein L17	40.853	25	6	169	6	RpL17	0.934	0.856	0.627129	0.202816	113.3	103.4	98.5	84.8	0		0
High	Q9VS34	60S ribosomal protein L18	49.959	38	6	145	6	RpL18	0.979	0.84	0.960203	0.154126	115	114.6	93.5	76.8	0		0
High	P41093	60S ribosomal protein L18a	43.925	55	12	151	12	RpL18A	1.087	0.88	0.356574	0.292628	106.8	111.6	96.3	85.3	0		0
High	P36241	60S ribosomal protein L19	48.395	34	8	154	8	RpL19	0.992	0.876	0.940472	0.279359	107.1	101	100.8	91.2	0		0
High	P50887	60S ribosomal protein L22	69.73	40	10	130	10	RpL22	0.912	0.974	0.479943	0.825095	111.3	103.2	92.9	92.7	0		0
High	P48159	60S ribosomal protein L23	36.181	46	5	66	5	RpL23	0.933	0.841	0.620344	0.157016	122.4	114	106	57.5	0		0
High	Q9VJY6	60S ribosomal protein L24	23.101	31	6	64	6	RpL24	0.896	0.883	0.384997	0.307514	110.3	89.2	106.2	94.2	0		0
High	P41092	60S ribosomal protein L27a	23.675	36	6	150	6	RpL27A	0.954	0.85	0.774229	0.182511	112.7	106.4	97.7	83.2	0		0
High	Q9VZS5	60S ribosomal protein L28	57.555	60	10	170	10	RpL28	0.997	0.846	0.900825	0.169758	109.5	99.5	104.2	86.8	0		0
High	Q24154	60S ribosomal protein L29	8.495	24	2	15	2	RpL29	0.912		0.498565		212.4	187.6			0		0
High	O16797	60S ribosomal protein L3	69.931	31	15	179	15	RpL3	1.029	0.848	0.679571	0.17849	106.3	113.5	97.3	83	0		0
High	Q9V597	60S ribosomal protein L31	24.814	48	7	70	7	RpL31	0.952	0.793	0.755557	0.0583132	123.3	121.3	86.3	69.1	0		0
High	P04359	60S ribosomal protein L32	26.907	41	6	91	6	RpL32	0.866	0.838	0.232166	0.14776	132.7	108.2	86.1	72.9	0		0
High	P49630	60S ribosomal protein L36	27.238	33	5	104	5	RpL36	0.919	0.875	0.521458	0.27233	112.9	105.1	96.3	85.7	0		0
High	Q9VMU4	60S ribosomal protein L37a	16.717	28	2	43	2	RpL37A	1.119	0.899	0.230768	0.38405	95.9	98.2	108.5	97.4	0		0
High	Q9W5N2	60S ribosomal protein L38	13.436	31	3	39	3	RpL38	0.806	0.862	0.0626317	0.225263	115	92.3	108.1	84.6	0		0
Medium	O16130	60S ribosomal protein L39	1.654	14	1	24	1	RpL39	0.957	0.831	0.796343	0.129052	111.4	107.1	98.4	83.1	0		0
High	P09180	60S ribosomal protein L4	190.541	53	22	462	22	RpL4	0.943	0.835	0.68953	0.13891	116.7	106.6	96.3	80.4	0		0
High	Q9W5R8	60S ribosomal protein L5	79.911	44	12	218	12	RpL5	0.998	0.889	0.898788	0.335587	118.1	117.7	86.7	77.5	0		0
High	P32100	60S ribosomal protein L7	80.021	57	15	277	15	RpL7	0.954	0.85	0.7735	0.181904	115	112.2	94	78.8	0		0
High	P46223	60S ribosomal protein L7a	75.381	35	12	225	12	RpL7A	1.036	0.831	0.630238	0.128776	117.8	120.5	88.5	73.2	0		0
High	Q9V3G1	60S ribosomal protein L8	57.278	33	12	215	12	RpL8	1.049	0.897	0.551438	0.371912	105.1	123.5	83.3	88	0		0
High	P50882	60S ribosomal protein L9	45.462	45	7	108	7	RpL9	0.937	0.867	0.647249	0.242012	109.6	98.5	104	88	0		0
High	P41572	6-phosphogluconate dehydrogenase, decarboxylating	106.769	42	16	221	16	Pgd	0.894	0.869	0.372965	0.250592	121.4	109.2	90.5	78.9	0		0
High	Q9W197	7-methylguanosine phosphate-specific 5'-nucleotidase	3.678	4	1	1	1	cN-IIIB	1.136	1.158	0.373486	0.23361	81.4	107.3	98.5	112.9	0		0
Medium	Q9VVW1	Accessory gland protein Acp76A	1.588	5	1	2	1	Acp76A	0.668	0.71	0.0290685	0.00520311	212.4	145.7	24.5	17.5	0		0
High	P04755	Acetylcholine receptor subunit beta-like 1	12.555	4	2	15	2	nAChRbeta1	0.851	1.239	0.446712	0.0813623	96.7	82.3	100.7	120.3	0		0
High	P07140	Acetylcholinesterase	44.343	14	5	59	5	Ace	1.054	1.027	0.521794	0.831055	115.4	108.9	86.8	88.9	0		0
High	Q9VP61	Acetyl-coenzyme A synthetase	226.101	47	25	482	25	AcCoAS	0.811	0.831	0.0717313	0.130651	135.5	112.6	82.1	69.8	0		0
High	Q9V895	Acidic leucine-rich nuclear phosphoprotein 32 family member A	21.014	12	2	30	2	Anp32a	1.116	1.038	0.35424	0.766048	87.7	96.1	102.6	113.6	0		0
High	P02574	Actin, larval muscle	296.559	63	20	1184	5	Act79B	1.036	1.509	0.630958	0.000819792	67.5	68.6	105.4	158.5	0		0
High	P02572	Actin-42A	314.338	66	20	1387	2	Act42A	1.043	1.058	0.588649	0.648049	96.9	97.4	97.9	107.8	0		0
High	P53501	Actin-57B	365.506	71	23	1650	5	Act57B	0.971	1.173	0.897351	0.195786	108.7	116.3	80.9	94.1	0		0
High	P10987	Actin-5C	339.07	66	21	1483	1	Act5C	0.854	0.999	0.18605	0.99125	106.6	112.4	90.3	90.6	0		0
High	Q9VU68	Actin-interacting protein 1	136.943	50	20	207	20	flr	0.991	0.983	0.951496	0.881762	93.2	97.4	105.6	103.8	0		0
High	P45889	Actin-related protein 1	17.367	10	3	31	3	Arp1	1.036	0.964	0.63802	0.760555	111.1	113.6	88.8	86.5	0		0
High	P45888	Actin-related protein 2	5.022	4	2	10	2	Arp2	0.913	0.977	0.509748	0.84447	72.3	60.5	135.3	131.9	0		0
High	Q9VIM5	Actin-related protein 2/3 complex subunit 2	4.223	5	1	1	1	Arpc2	1.052	1.048	0.64796	0.705745	94.3	92.6	105	108.1	0		0
High	P32392	Actin-related protein 3	20.976	13	3	22	3	Arp3	0.775	0.893	0.094897	0.354396	127.7	70.2	102.5	99.6	0		0
High	Q7K1U0	Activity-regulated cytoskeleton associated protein 1	13.672	13	2	11	2	Arc1	1.801	3.271	0.00284802	1e-17	12.2	21.8	33.9	332.1	0		0
High	P42281	Acyl-CoA-binding protein homolog	87.006	81	5	182	5	Acbp2	0.878	0.748	0.285868	0.017671	152.1	127.1	69.2	51.6	0		0
High	Q9XYM0	Adapter molecule Crk	13.475	12	3	23	3	Crk	0.839	0.98	0.169954	0.866785	100.1	90	103.4	106.5	0		0
High	P12426	Adenine phosphoribosyltransferase	5.4	10	2	6	2	Aprt	1.198	0.795	0.204906	0.0613096	33.4	39.9	170.5	156.3	0		0
High	Q27580	Adenosylhomocysteinase	49.545	23	9	99	9	Ahcy	1.21	1.035	0.0548835	0.785518	97.7	114.9	98.8	88.7	0		0
High	Q9VZX9	Adenosylhomocysteinase-like 1	9.369	9	3	11	3	AhcyL1	0.969	0.911	0.917561	0.444709	106.8	101.3	99.7	92.2	0		0
High	Q9U915	Adenylate kinase	49.42	35	8	131	8	Adk2	0.927	0.904	0.580354	0.408075	109.7	101.8	95.5	93	0		0
High	Q9Y0Y2	Adenylosuccinate synthetase	39.852	19	7	57	7	AdSS	0.824	1.004	0.0990517	0.979522	94.4	77.6	121.1	106.8	0		0
High	Q9VCY8	Adiponectin receptor protein	2.62	6	1	1	1	AdipoR	0.511		0.0009397		267	133			0		0
High	P61209	ADP-ribosylation factor 1	86.786	70	12	135	7	Arf79F	0.88	0.94	0.296122	0.611417	118.2	103.7	92.7	85.4	0		0
High	P40945	ADP-ribosylation factor 2	59.673	64	9	81	4	Arf102F	0.813	1.028	0.0810808	0.824472	118.9	93.4	91.3	96.4	0		0
High	P25160	ADP-ribosylation factor-like protein 1	9.769	21	2	8	2	Arl1	1.236	1.123	0.189814	0.347659	88	83.4	107.4	121.2	0		0
High	Q9VES1	ADP-ribosylation factor-like protein 6-interacting protein 1	16.867	18	3	30	3	Arl6IP1	1.048	0.992	0.584353	0.944002	60.9	63.7	136.7	138.7	0		0
High	Q9VHV5	ADP-ribosylation factor-like protein 8	31.842	31	3	38	3	Arl8	0.81	1.184	0.0788388	0.170137	114.6	83.6	93.1	108.7	0		0
High	Q26416	Adult cuticle protein 1	31.805	20	1	54	1	Acp1	0.785	0.998	0.0350513	0.981047	142.3	116.1	71.1	70.5	0		0
High	Q9VLL3	A-kinase anchor protein 200	76.779	20	11	90	11	Akap200	0.993	1.06	0.935515	0.639139	117.3	109.7	80.6	92.4	0		0
Medium	Q9W351	Aladin	1.815	2	1	4	1	Aladin	0.852	0.888	0.179289	0.331892	95.7	85	115.7	103.6	0		0
High	Q9VLM8	Alanine--tRNA ligase, cytoplasmic	55.329	15	13	77	13	AlaRS	1.018	1.015	0.75064	0.90911	109.3	120	86.8	83.9	0		0
High	P46415	Alcohol dehydrogenase class-3	96.239	51	13	149	13	Fdh	1.14	1.02	0.170862	0.876284	114.7	118.1	82.8	84.5	0		0
High	P00334	Alcohol dehydrogenase	383.394	89	19	1545	19	Adh	0.525	0.535	4.95562e-09	3.25033e-07	140.3	74.1	123.3	62.3	0		0
High	P18091	Alpha-actinin, sarcomeric	344.266	53	43	819	43	Actn	1.077	1.066	0.399666	0.605385	90.4	99.7	101.5	108.4	0		0
High	P81641	Alpha-amylase B	16.382	8	3	15	3	Amy-d	2.684	5.722	7.44847e-09	1e-17	10.5	138.7	28.7	222	0		0
High	Q23983	Alpha-soluble NSF attachment protein	201.474	64	16	334	16	alphaSnap	0.999	0.991	0.892765	0.934653	86.2	83.9	116.6	113.3	0		0
High	Q9VSY4	Alpha-tubulin N-acetyltransferase 1	17.608	8	3	61	3	Atat	1.015	1.016	0.777979	0.901549	92.7	105.2	99.7	102.4	0		0
High	Q27601	Amidophosphoribosyltransferase	4.806	3	2	6	2	Prat	0.872	0.938	0.260494	0.594958	170.8	147.6	42.1	39.5	0		0
High	Q9V3Y2	Anamorsin homolog	2.656	6	1	1	1	CIAPIN1	1.095	1.169	0.52896	0.206728	109	119	76.5	95.5	0		0
Medium	Q10714	Angiotensin-converting enzyme	1.885	2	1	2	1	Ance	0.873	100	0.529421	1e-17	200.9	176.6		22.5	0		0
High	Q9VLJ6	Angiotensin-converting enzyme-related protein	46.616	16	10	74	10	Acer	1.141	0.88	0.168836	0.295715	84.3	100.5	114.1	101.1	0		0
High	P22465	Annexin B10	168.538	61	16	321	2	AnxB10	0.965	1.066	0.856562	0.604959	82.5	83.4	113.2	121	0		0
High	Q9VXG4	Annexin B11	16.482	7	3	28	3	AnxB11	1.215	1.126	0.0947494	0.335803	110.6	125	82.5	81.9	0		0
High	P91926	AP-2 complex subunit alpha	159.924	35	28	410	28	AP-2alpha	1.004	1.004	0.852201	0.97968	94.5	93	110.5	102.1	0		0
High	P54362	AP-3 complex subunit delta	2.432	1	1	5	1	g	1.939	1.386	0.000737206	0.00802952	42.8	82.9	116.8	157.5	0		0
High	Q9V496	Apolipophorins	1516.79	58	185	4618	185	apolpp	1.051	0.744	0.541214	0.0158678	85.5	88.3	131.1	95.1	0		0
High	Q9V431	Apoptosis inhibitor 5 homolog	35.963	16	8	36	8	cass	0.906	0.981	0.441101	0.870856	146.7	115.3	66.1	71.9	0		0
High	A1Z7A6	ArfGAP with SH3 domain, ANK repeat and PH domain-containing protein	2.514	1	1	6	1	Asap	1.551	0.754	0.000157568	0.0209832	88.2	129.7	104.4	77.6	0		0
High	P48610	Arginine kinase	483.339	68	30	1727	2	Argk1	1.194	1.037	0.0726124	0.770789	44.2	54.8	153	148	0		0
High	Q7K486	Armadillo repeat-containing protein 6 homolog	7.64	5	1	16	1		0.914	1.29	0.765056	0.0387155	166.3	103.9	61	68.7	0		0
High	P18824	Armadillo segment polarity protein	19.828	6	4	13	4	arm	0.95	0.817	0.74192	0.0981145	117.8	108.9	91	82.4	0		0
High	P05031	Aromatic-L-amino-acid decarboxylase	27.867	13	4	15	4	Ddc	0.792	1.051	0.0620569	0.69207	132.6	113.4	79	74.9	0		0
Low	Q9VC57	Atlastin	1.394	1	1	2	1	atl	1.186	0.916	0.267166	0.469198	70.9	85.9	127	116.2	0		0
High	P84345	ATP synthase protein 8	7.115	19	1	10	1	mt:ATPase8	0.797	0.421	0.0595182	1.809e-12	206	164.2	20.6	9.2	0		0
High	P00850	ATP synthase subunit a	6.542	6	1	6	1	mt:ATPase6	1.407		0.0501577		159	241			0		0
High	P35381	ATP synthase subunit alpha, mitochondrial	369.347	63	39	1552	39	blw	0.974	1.038	0.921157	0.766999	92.4	88.4	107.7	111.5	0		0
High	Q94516	ATP synthase subunit b, mitochondrial	139.939	56	17	402	17	ATPsynB	0.869	1.032	0.246869	0.805467	107.5	96.5	97.9	98.2	0		0
High	Q05825	ATP synthase subunit beta, mitochondrial	637.408	77	30	1915	30	ATPsynbeta	0.904	1.063	0.428955	0.621863	96.2	88.4	105.8	109.6	0		0
High	Q24251	ATP synthase subunit d, mitochondrial	172.252	88	18	601	18	ATPsynD	0.939	1.011	0.65883	0.937062	98.3	91.9	105.1	104.7	0		0
High	O01666	ATP synthase subunit gamma, mitochondrial	162.051	62	18	584	18	ATPsyngamma	0.914	1.006	0.491406	0.964559	97.5	89.3	105.8	107.4	0		0
High	Q24439	ATP synthase subunit O, mitochondrial	169.923	66	16	494	16	ATPsynO	0.945	0.997	0.703295	0.972302	94.6	87.7	112.8	104.8	0		0
High	Q24407	ATP synthase-coupling factor 6, mitochondrial	28.084	53	6	210	6	ATPsynCF6	0.84	1.01	0.141277	0.943575	101.6	91.9	103.2	103.3	0		0
High	Q7JWD3	ATPase ASNA1 homolog	19.286	11	2	32	2		0.78	1.065	0.109105	0.610219	105.9	86.3	99.9	107.9	0		0
High	Q9VEX6	ATPase family AAA domain-containing protein 3A homolog	43.145	18	10	96	10	bor	0.994	0.89	0.929579	0.340158	87.5	95.1	114.7	102.7	0		0
Low	Q9VHG4	ATPase H(+)-transporting accessory protein 2	1.463	2	1	20	1	ATP6AP2	1.235	1.04	0.100263	0.75369	81.5	98.1	108.9	111.5	0		0
High	P52034	ATP-dependent 6-phosphofructokinase	189.559	31	19	406	19	Pfk	0.835	0.94	0.126022	0.612017	112.6	85.2	105.1	97.1	0		0
High	P25439	ATP-dependent helicase brm	3.556	1	1	5	1	brm	1.206	1.005	0.245869	0.971917	75.4	99	114	111.6	0		0
High	Q9VHP0	ATP-dependent RNA helicase bel	44.276	12	6	71	6	bel	1.086	1.074	0.398112	0.563708	112.2	110.3	86.9	90.7	0		0
High	P23128	ATP-dependent RNA helicase me31b	16.729	5	2	29	2	me31B	0.845	1.327	0.424835	0.0216279	161.6	125.6	48.2	64.6	0		0
High	P19109	ATP-dependent RNA helicase p62	58.347	16	8	66	8	Rm62	1.139	1.029	0.174021	0.820624	100.5	112.7	93.4	93.5	0		0
High	Q27268	ATP-dependent RNA helicase WM6	85.709	36	12	176	12	Hel25E	1.014	0.988	0.7805	0.915898	93.4	96.9	107.8	101.9	0		0
High	P45884	Attacin-A	39.917	44	5	19	1	AttA	0.724	4.997	0.11537	1e-17	13.1	6	49	331.9	0		0
High	Q9V751	Attacin-B	39.823	45	5	20	1	AttB	100	2.038	1e-17	6.79416e-09		32.1	120.6	247.3	0		0
High	Q95NH6	Attacin-C	11.195	13	2	7	2	AttC	0.01	4.35	1e-17	1e-17	26.1		29	344.9	0		0
High	Q9VQF7	Bacchus	99.281	41	6	149	6	Bacc	1.173	0.949	0.101688	0.661917	102.2	112.3	94.3	91.1	0		0
High	Q9VZA4	Band 7 protein CG42540	40.572	20	8	94	2		0.996	0.989	0.913347	0.923044	99.9	92.8	102.6	104.7	0		0
High	Q9VLU0	Barrier-to-autointegration factor	9.757	17	1	14	1	baf	1.225	1.077	0.0860965	0.552193	100	121.4	86.2	92.5	0		0
High	Q9VLS9	Beta-lactamase-like protein 2 homolog	9.867	11	2	5	2		0.973	0.85	0.935771	0.184117	149.3	146.7	56.4	47.6	0		0
High	P28668	Bifunctional glutamate/proline--tRNA ligase	17.401	4	4	17	4	GluProRS	0.948	0.995	0.724678	0.963562	102.2	134.8	81.4	81.6	0		0
High	Q04448	Bifunctional methylenetetrahydrofolate dehydrogenase/cyclohydrolase, mitochondrial	3.575	4	1	3	1	Nmdmc	100	1.313	1e-17	0.0270051		59.4	151	189.6	0		0
High	Q9V8F5	Bomanin Bicipital 1	3.213	9	1	1	1	BomBc1	4.908	2.24	1e-17	5.16671e-11	15.3	80.1	95.6	209	0		0
High	O96553	C-1-tetrahydrofolate synthase, cytoplasmic	181.618	35	29	337	29	pug	0.923	1.048	0.54867	0.70439	137.6	126	62.8	73.6	0		0
High	P05990	CAD protein	28.4	5	6	25	6	r	0.821	0.716	0.0904942	0.00626192	135.5	115.3	80.7	68.5	0		0
High	P41044	Calbindin-32	82.621	53	17	157	17	Cbp53E	0.957	1.059	0.794872	0.646923	89.9	95.1	105.1	109.9	0		0
High	P48451	Calcineurin subunit B type 1	16.081	22	3	31	3	CanB	0.916	0.971	0.504486	0.802793	107.9	97.6	98	96.5	0		0
High	Q95T12	Calcium channel flower	19.876	26	3	49	3	fwe	1.025	0.974	0.765757	0.825678	97.8	81.9	109.5	110.8	0		0
High	Q00168	Calcium/calmodulin-dependent protein kinase type II alpha chain	175.858	49	23	425	23	CaMKII	1.025	0.936	0.707995	0.585794	96.7	99.3	104.5	99.4	0		0
High	Q9NHE5	Calcium-dependent secretion activator	15.929	3	3	27	3	Cadps	1.102	1.072	0.30334	0.577418	82.3	99.6	103.3	114.8	0		0
High	P22700	Calcium-transporting ATPase sarcoplasmic/endoplasmic reticulum type	580.399	53	52	1837	1	SERCA	100	0.921	1e-17	0.497948		66.7	174	159.3	1	Acetyl [N-Term]	0
High	P62152	Calmodulin	190.819	74	15	662	15	Cam	1.183	0.937	0.0872022	0.588991	95.2	102.4	102.9	99.5	0		0
High	Q11002	Calpain-A	54.172	16	9	109	9	CalpA	0.899	1.039	0.398719	0.757321	92.9	80.2	107.7	119.2	0		0
High	Q02910	Calphotin	28.262	3	1	68	1	Cpn	1.102	1.477	0.331233	0.00152989	119	139.6	57.2	84.2	0		0
High	P29413	Calreticulin	138.61	53	18	320	18	Calr	1.026	0.847	0.696176	0.173386	97.2	97.6	111.1	94.1	0		0
High	P12370	cAMP-dependent protein kinase catalytic subunit 1	143.83	53	18	353	18	Pka-C1	0.988	1.076	0.974065	0.555921	96	92.6	104.7	106.7	0		0
High	P16905	cAMP-dependent protein kinase type I regulatory subunit	41.954	21	5	67	5	Pka-R1	0.949	1.117	0.750922	0.369946	81.3	91.2	109.4	118.2	0		0
High	P81900	cAMP-dependent protein kinase type II regulatory subunit	95.086	44	15	230	15	Pka-R2	0.982	1.014	0.982688	0.913842	90.5	93.9	105.5	110.1	0		0
High	Q9W4T4	cAMP-specific 3',5'-cyclic phosphodiesterase, isoform I	16.822	5	3	25	3	dnc	0.8	1.66	0.253012	3.73278e-05	7.5	6.3	137.6	248.6	0		0
Medium	Q8SXX4	Capon-like protein	1.519	2	1	15	1		0.875	1.135	0.444434	0.305445	115.2	98.4	88.1	98.2	0		0
High	Q9I7D3	Caprin homolog	7.566	3	2	3	2	Capr	1.033	1.1	0.753897	0.441158	123.4	135.6	71.6	69.4	0		0
High	P42787	Carboxypeptidase D	11.773	2	3	46	3	svr	1.093	1.048	0.352819	0.708063	74.5	82.8	115.9	126.8	0		0
High	P54367	Casein kinase I isoform alpha	9.082	6	2	33	2	CkIalpha	1.039	1.012	0.725811	0.92541	89.1	96.1	103.9	111	0		0
High	P08181	Casein kinase II subunit alpha	71.855	43	12	117	12	CkIIalpha	0.887	1.001	0.330974	0.998187	85.5	79.3	105.7	129.5	0		0
High	P08182	Casein kinase II subunit beta	14.385	13	3	30	3	CkIIbeta	1.168	1.059	0.122441	0.647473	88	107.2	98	106.8	0		0
Medium	Q8IRY7	Caspase-8	1.587	1	1	12	1	Dredd	0.955	0.737	0.909238	0.012677	83.1	78.6	137.7	100.6	0		0
High	P17336	Catalase	219.735	59	22	440	22	Cat	0.887	0.827	0.334337	0.12089	121.3	103.7	96.2	78.8	0		0
High	P35220	Catenin alpha	25.05	10	5	34	5	alpha-Cat	1.105	1.169	0.431134	0.205492	64.9	78.4	131.3	125.5	0		0
High	Q95029	Cathepsin L	41.833	30	8	71	8	Cp1	0.91	1.394	0.465889	0.00689218	92.3	87	96.3	124.4	0		0
High	Q8T8R1	CCHC-type zinc finger protein CG3800	20.292	39	5	51	5	CNBP	0.95	0.871	0.743135	0.256617	129.8	130.7	75.2	64.3	0		0
High	P40793	Cdc42 homolog	42.261	28	5	98	4	Cdc42	0.945	1.016	0.707497	0.90409	95.1	92.9	105.4	106.6	0		0
High	Q9VAM6	CDGSH iron-sulfur domain-containing protein 2 homolog	61.408	56	6	204	6	Cisd2	0.899	0.945	0.397189	0.640033	111.3	103.1	96.1	89.5	1	Acetyl [N-Term]	0
High	Q8SX37	CDP-diacylglycerol--inositol 3-phosphatidyltransferase	8.782	9	2	36	2	Pis	1.243	0.966	0.033515	0.774714	76.4	94	111.4	118.2	0		0
High	C0HKQ8	Cecropin-A2	14.528	33	1	6	1	CecA2	0.961	100	0.968672	1e-17	36.6	35.2		328.1	0		0
Low	Q9W0M1	Centrosomal protein cep290	1.424	1	1	2	1	cep290	1.055	6.526	0.628272	1e-17	87.1	91.9	26.7	194.4	0		0
High	Q24478	Centrosome-associated zinc finger protein CP190	10.777	3	2	19	2	Cp190	1.146	1.013	0.303825	0.921449	93.8	107	102.2	97	0		0
High	Q03043	cGMP-dependent protein kinase, isozyme 2 forms cD4/T1/T3A/T3B	34.219	7	6	23	6	for	0.757	0.905	0.0145224	0.410014	121.6	90.4	101.2	86.8	0		0
High	Q9VFI9	cGMP-specific 3',5'-cyclic phosphodiesterase	5.963	1	1	3	1	Pde6	1.099	0.01	0.473694	1e-17	131.7	139.1	129.2		0		0
High	P12024	Chaoptin	868.147	55	58	2126	58	chp	0.902	1.018	0.419757	0.888438	108.2	98.7	96.6	96.6	0		0
High	Q9VVI9	Charged multivesicular body protein 5	14.499	17	3	30	3	Vps60	1.148	1.064	0.151205	0.618608	100	106.3	94.6	99.2	0		0
High	Q8MM24	Chitinase-like protein Idgf1	11.488	10	3	5	3	Idgf1	1.089	1.119	0.483902	0.362832	77.2	86.3	115.4	121	0		0
High	Q9V3D4	Chitinase-like protein Idgf2	70.228	32	9	105	9	Idgf2	0.92	1.266	0.527561	0.0551305	76.3	70.4	110.2	143	0		0
High	Q8MLZ7	Chitinase-like protein Idgf3	36.168	12	3	36	3	Idgf3	0.982	2.055	0.981815	4.61182e-09	46.8	54.7	88.7	209.8	0		0
High	Q9W303	Chitinase-like protein Idgf4	170.14	60	19	409	18	Idgf4	1.046	1.027	0.571528	0.83263	85.8	91.7	110.3	112.3	0		0
High	P07668	Choline O=-acetyltransferase	72.787	25	11	135	11	ChAT	1.023	0.999	0.718392	0.990459	100.1	124.3	90.3	85.4	0		0
High	Q9VZE7	Choline transporter-like 1	6.646	2	1	3	1	Ctl1		1.027		0.835595			202.6	197.4	0		0
High	Q24572	Chromatin assembly factor 1 p55 subunit	13.012	11	2	3	2	Caf1-55	1.056	1.151	0.621012	0.254038	117.8	123.4	72.7	86.1	0		0
High	Q24368	Chromatin-remodeling complex ATPase chain Iswi	3.5	2	1	2	1	Iswi	1.419	1.365	0.0492768	0.0113504	89.9	136.9	73.2	100	0		0
Low	Q7KU24	Chromodomain-helicase-DNA-binding protein 1	1.505	0	1	4	1	Chd1	1.209	1.414	0.0976731	0.00485066	86.1	103.6	86.7	123.7	0		0
High	O97159	Chromodomain-helicase-DNA-binding protein Mi-2 homolog	8.094	2	2	3	2	Mi-2	1.091	1.036	0.531783	0.775424	104.7	118.7	86.4	90.2	0		0
High	P22058	Chromosomal protein D1	57.684	27	7	81	7	D1	1.364	1.44	0.00245972	0.00303753	88	135.2	73.4	103.4	0		2	Phospho [S246(100); T321(100)]
High	P29742	Clathrin heavy chain	388.548	37	53	900	53	Chc	0.993	1	0.935033	0.996462	100	97.2	101.9	100.8	0		0
High	Q9VWA1	Clathrin light chain	31.132	32	7	65	7	Clc	1.008	0.984	0.826896	0.891424	98.1	104.6	102.4	94.9	0		0
Medium	Q9VSH4	Cleavage and polyadenylation specificity factor subunit 6	1.666	1	1	12	1	Cpsf6	1.022	0.871	0.788495	0.259511	79.9	79.6	129.4	111.1	0		0
High	Q9VG76	c-Myc-binding protein homolog	8.24	8	1	5	1		1.14	0.879	0.357524	0.288688	84.9	97.5	115.9	101.7	0		0
High	P45437	Coatomer subunit beta	64.188	13	8	94	8	betaCOP	1.026	0.924	0.728749	0.514601	98	99	103.7	99.3	0		0
High	O62621	Coatomer subunit beta'	31.414	10	6	44	6	beta'COP	0.88	1.018	0.298086	0.889094	121.9	92.9	95.1	90.1	0		0
High	Q8I0G5	Coatomer subunit gamma	40.703	9	5	66	5	gammaCOP	0.796	0.997	0.0518704	0.972913	82.9	105.4	107	104.6	0		0
High	P45594	Cofilin/actin-depolymerizing factor homolog	52.991	59	9	218	9	tsr	0.947	0.998	0.721758	0.980947	100.6	101.1	98.9	99.5	0		1	Phospho [S3(100)]
High	Q9VVA0	Cold shock domain-containing protein CG9705	2.76	9	1	2	1		1.2	1.144	0.214361	0.275285	103.9	123.9	78.6	93.7	0		0
High	Q8IPM8	Complexin	58.896	46	7	91	7	cpx	0.984	0.923	0.999948	0.512298	96.5	85.3	138.4	79.7	0		0
High	Q9VQG4	Congested-like trachea protein	39.03	24	5	96	5	colt	1.198	1.032	0.0668718	0.799673	102.2	123.7	88.3	85.9	0		0
High	Q01819	Connectin	2.472	3	1	2	1	Con	0.853	1.282	0.529079	0.0437896	158.3	131.2	48.5	62.1	0		0
High	Q9VN14	Contactin	45.389	10	10	59	10	Cont	1.038	1.019	0.61827	0.884902	77.3	82.2	116.1	124.4	0		0
High	Q8SYG2	COP9 signalosome complex subunit 3	7.942	3	1	9	1	CSN3	0.878	0.97	0.549078	0.801351	131.5	118.1	77.6	72.7	0		0
High	Q9V345	COP9 signalosome complex subunit 4	8.805	4	1	4	1	CSN4		1.09		0.485125			194.7	205.3	0		0
Medium	Q9XZ58	COP9 signalosome complex subunit 5	2	2	1	1	1	CSN5	1.321	1.062	0.107583	0.627814	102.9	131.3	78.5	87.3	0		0
High	Q9V4S8	COP9 signalosome complex subunit 7	10.121	15	2	19	2	CSN7	0.886	0.628	0.643565	0.000149581	134.3	81.8	113.7	70.3	0		0
High	O77059	Cryptochrome-1	31.563	12	3	38	3	cry	0.803	1.059	0.222428	0.644818	74.4	56.6	125.7	143.3	0		0
High	O46036	C-terminal-binding protein	21.842	9	3	39	3	CtBP	0.864	1.005	0.257026	0.970824	113	96.3	97.5	93.2	0		0
Medium	Q9VUL1	CTP synthase	1.716	2	1	1	1	CTPsyn									0		0
High	Q9VKY2	Cullin-associated NEDD8-dissociated protein 1	60.008	13	11	90	11	Cand1	0.899	1.091	0.403381	0.483683	113.9	104.3	90.2	91.7	0		0
High	P23779	Cystatin-like protein	121.289	63	8	303	8	Cys	0.827	0.841	0.106493	0.156858	88.7	76.6	121.3	113.4	0		0
High	Q9VCC0	Cysteine and histidine-rich domain-containing protein	3.523	3	1	6	1	mora	1.228	0.976	0.13994	0.841079	92.8	110.5	99.7	97	0		0
High	Q9VKD3	Cysteine desulfurase, mitochondrial	54.548	27	10	87	10	Nfs1	1.058	1.024	0.500311	0.85025	87.9	84.5	114.3	113.3	0		0
High	Q7KN90	Cysteine--tRNA ligase, cytoplasmic	10.915	3	2	18	2	CysRS	1.072	0.84	0.510113	0.1525	114.1	121.8	90.3	73.8	0		0
High	P18935	Cytochrome b	12.504	9	4	56	4	mt:Cyt-b	0.989	1.145	0.965943	0.271937	74.3	69.4	122.4	133.8	0		0
High	Q9V4N3	Cytochrome b5	32.228	25	2	74	2	Cyt-b5	1.152	0.986	0.143492	0.903212	109.5	126.1	83	81.3	0		0
High	P19967	Cytochrome b5-related protein	83.265	23	10	122	10	Cyt-b5-r	0.824	0.736	0.0972095	0.012418	156.9	132.3	66.7	44.1	0		0
High	Q9XY35	Cytochrome b-c1 complex subunit 9	12.376	42	2	36	2	ox	1.038	1.168	0.622238	0.206919	39	79	129.4	152.6	0		0
High	P0DKM0	Cytochrome c oxidase assembly factor 3, mitochondrial	2.993	10	1	10	1	Ccdc56	1.239	0.933	0.0896811	0.569414	95.9	119.7	93.9	90.6	0		0
High	Q9W5N0	Cytochrome c oxidase assembly factor 7 homolog	7.781	6	1	10	1	Coa7	0.874	0.967	0.343313	0.780204	99	78.2	112	110.8	0		0
High	P00399	Cytochrome c oxidase subunit 1	14.331	10	3	46	3	mt:CoI	1.131	0.927	0.195339	0.534532	66.2	61	141.3	131.6	0		0
High	P00408	Cytochrome c oxidase subunit 2	60.18	26	5	215	5	mt:CoII	1.062	1.067	0.477209	0.601251	97.3	95.8	97.7	109.2	0		0
High	P00417	Cytochrome c oxidase subunit 3	3.387	3	1	7	1	mt:CoIII	1.198	1.077	0.175192	0.550781	66.4	80.3	121.8	131.4	0		0
High	Q94514	Cytochrome c oxidase subunit 5A, mitochondrial	77.684	42	7	312	7	COX5A	0.912	1.078	0.478123	0.543006	110.7	100.9	89.6	98.7	0		0
High	Q9VHS2	Cytochrome c oxidase subunit 7A, mitochondrial	31.381	57	7	116	7	COX7A	0.958	0.996	0.805459	0.970467	92.2	97.6	105.7	104.5	0		0
High	P84029	Cytochrome c-2	125.796	81	10	530	10	Cyt-c-p	1.077	1.153	0.400693	0.250109	92	96.9	98.6	112.4	0		0
High	Q27606	Cytochrome P450 4e2	17.01	9	4	25	4	Cyp4e2	0.398	0.815	4.13128e-10	0.0943171	131	42	140.9	86.1	0		0
High	Q9V558	Cytochrome P450 4p1	3.637	3	1	1	1	Cyp4p1	100	100	1e-17	1e-17		113.4		286.6	0		0
High	Q9V674	Cytochrome P450 6g1	3.154	2	1	1	1	Cyp6g1	1.198	0.629	0.276241	0.000155628	138.4	165.8	54.1	41.6	0		0
High	Q9V4I1	Cytochrome P450 9b2	47.587	19	8	51	8	Cyp9b2	0.692	0.523	0.00106789	1.19436e-07	133.7	77.3	123.8	65.2	0		0
High	Q9W130	Cytochrome P450 9c1	6.262	3	1	6	1	Cyp9c1	0.844	0.51	0.492655	3.96141e-08	132.6	112.9	102.3	52.2	0		0
High	Q9U9P7	Cytoplasmic phosphatidylinositol transfer protein 1	2.854	5	1	1	1	rdgBbeta	0.906	0.973	0.439463	0.818353	89	79	117.8	114.2	0		0
High	Q9VPD2	Cytosolic Fe-S cluster assembly factor NUBP2 homolog	3.478	12	1	4	1		0.46	1.176	6.34514e-05	0.187769	155	48.6	90.2	106.1	0		0
High	Q9V3Y3	Defense protein l(2)34Fc	17.951	26	2	14	2	l(2)34Fc	0.566	0.594	5.05114e-05	2.15223e-05	230.6	103.1	41.7	24.5	0		0
High	Q9Y140	Dehydrogenase/reductase SDR family protein 7-like	16.164	10	2	18	2		0.908	1.115	0.544094	0.376989	70.5	68.2	133.1	128.1	0		0
High	Q9W3D3	DENN domain-containing protein Crag	5.078	1	1	9	1	Crag	0.839	1.13	0.443581	0.324173	99.5	98	94.4	108.1	0		0
High	Q9VX98	Density-regulated protein homolog	14.957	16	2	16	2	DENR	0.955	0.866	0.889287	0.238537	100.9	67.8	124.3	107	0		0
High	Q9VQ57	Derlin-1	4.435	5	1	4	1	Der-1		0.823		0.110858			223.3	176.7	0		0
Medium	Q01583	Diacylglycerol kinase 1	1.796	1	1	3	1	Dgk	0.848	0.947	0.190368	0.651804	113.2	98.3	96.8	91.6	0		0
High	P32748	Dihydroorotate dehydrogenase (quinone), mitochondrial	2.298	5	1	1	1	Dhod									0		0
High	Q9VHR8	Dipeptidyl peptidase 3	111.42	37	24	239	24	DppIII	0.914	0.899	0.488518	0.383731	103.5	95	107.9	93.6	0		0
High	P24492	Diptericin A	2.786	8	1	3	1	DptA	1.173	15.716	0.342316	1e-17	12.7	14.9	22.3	350.2	0		0
High	P31007	Disks large 1 tumor suppressor protein	131.814	26	18	220	7	dlg1	1.042	1.07	0.594464	0.586145	97.6	100.3	98.1	104	0		0
Medium	Q24114	Division abnormally delayed protein	1.785	2	1	1	1	dally	0.307	0.574	2.24406e-09	5.84379e-06	169.5	52	111.6	66.9	0		0
High	Q9XYZ5	DNA damage-binding protein 1	7.676	3	3	5	3	pic	0.866	0.942	0.379098	0.621423	112.8	91.4	85.4	110.5	0		0
Medium	Q9GSR1	DNA polymerase zeta catalytic subunit	1.886	0	1	2	1	PolZ1	1.133	1.005	0.190023	0.970035	79.7	89.7	115	115.6	0		0
High	P15348	DNA topoisomerase 2	24.492	5	6	47	6	Top2	0.941	1.156	0.697544	0.240056	137.9	113.7	67.6	80.8	0		0
High	P13469	DNA-binding protein modulo	86.094	32	12	113	12	mod	1.161	1.101	0.12393	0.436659	85	98.8	104	112.2	0		1	Phospho [S129(100)]
High	Q9VPQ2	DnaJ homolog shv	6.946	6	2	6	2	shv	1.41	0.97	0.000812265	0.799936	89.4	126.6	92	92	0		0
High	Q03751	DnaJ homolog subfamily C member 5 homolog	32.04	17	4	94	4	Csp	0.941	1.051	0.673859	0.692307	92.4	88.3	107	112.3	0		1	Phospho [S12(100)]
High	Q24133	DnaJ protein homolog 1	15.146	19	4	11	4	DnaJ-1	1.123	1.085	0.283714	0.509703	100.7	115.8	77.6	105.9	0		0
Medium	Q9VNX1	DNApol-eta	1.998	1	1	3	1	PolH	0.893	0.849	0.51718	0.18008	90.7	79.8	124.2	105.3	0		0
High	Q9VIU7	Dolichol-phosphate mannosyltransferase subunit 1	7.084	6	1	2	1	Dpm1	1.19	0.913	0.221138	0.452229	99.5	119.2	93.5	87.8	0		0
High	Q24319	Dolichyl-diphosphooligosaccharide--protein glycosyltransferase 48 kDa subunit	43.306	24	8	62	8	Ost48	1.017	0.971	0.762665	0.805944	73.1	113.8	106.7	106.4	0		0
High	Q9VLM5	Dolichyl-diphosphooligosaccharide--protein glycosyltransferase subunit DAD1	5.118	10	1	7	1	Dad1	0.976	0.871	0.963278	0.259012	122.2	116.6	85.3	75.9	0		0
High	Q94521	Dopamine N-acetyltransferase	18.986	17	5	38	5	speck	1.04	0.94	0.610192	0.61046	95.8	111.1	99.8	93.4	0		0
High	Q9VU84	Drebrin-like protein	13.85	6	2	6	2	Abp1	1.041	1.058	0.694947	0.650792	125.5	113.1	76.5	84.9	0		0
High	P61849	Dromyosuppressin	46.344	45	4	80	4	Ms	0.958	1.226	0.799545	0.0984485	73.5	74.6	124	127.8	0		0
High	P41964	Drosomycin	16.334	31	2	37	2	Drs	1.137	1.03	0.180872	0.816774	73	83.2	114.3	129.5	0		0
High	Q7KNA0	Dymeclin	12.415	6	3	19	3		0.756	1.056	0.162605	0.659807	80.9	41.3	128.7	149.2	0		0
High	P13496	Dynactin subunit 1	16.016	4	4	7	4	DCTN1-p150	0.989	1.122	0.974029	0.350371	81.6	78.7	110.8	129	0		0
High	Q7K2D2	Dynactin subunit 2	13.417	8	3	25	3	DCTN2-p50	1.093	0.944	0.327628	0.634169	102.4	111.4	95.8	90.4	0		0
High	P27619	Dynamin	322.098	45	42	892	42	shi	0.989	1.045	0.960749	0.723459	94.8	96.1	102.1	107	1	Acetyl [N-Term]	0
High	P37276	Dynein heavy chain, cytoplasmic	112.115	7	23	157	23	Dhc64C	0.952	1.011	0.759047	0.934425	89.9	96.4	107.8	105.8	0		0
High	Q24117	Dynein light chain 1, cytoplasmic	24.435	33	3	107	3	ctp	1.123	1.076	0.22011	0.552825	94.5	98.4	99.3	107.8	0		0
Low	Q0KI50	Dystrophin, isoform D	1.392	0	1	6	1	Dys	1.085	0.915	0.370249	0.462854	83.7	88.6	119.7	108	0		0
High	A0A0B4K7J2	E3 SUMO=-protein ligase RanBP2	24.658	3	7	37	7	Nup358	1.192	1.04	0.0782361	0.753815	90	114	96.5	99.4	0		0
Low	P51592	E3 ubiquitin-protein ligase hyd	1.457	1	1	1	1	hyd	0.94	100	0.885741	1e-17	148.2	145.7		106	0		0
High	Q95RX5	E3 ubiquitin-protein ligase Kcmf1	3.896	3	1	8	1	Kcmf1	1.059	1.31	0.646075	0.0282048	129.2	128.1	61.8	80.9	0		0
Low	Q9VI55	E3 UFM1-protein ligase 1 homolog	1.479	1	1	10	1	Ufl1	1.511	0.977	0.00504286	0.847646	37.5	53.6	156.1	152.7	0		0
Medium	Q9VJ26	EF-hand domain-containing protein D2 homolog	1.755	3	1	2	1	Swip-1	1.005	1.137	0.845219	0.297171	102.4	92.4	99	106.2	0		0
High	Q9W1C9	Ejaculatory bulb-specific protein 3	40.639	48	8	169	8	EbpIII	0.861	0.92	0.214004	0.494678	90.7	77.3	121.2	110.8	0		0
High	P08736	Elongation factor 1-alpha 1	284.108	63	20	1084	5	eEF1alpha1	0.821	0.923	0.091837	0.507184	137.1	103.2	83	76.7	0		0
High	P05303	Elongation factor 1-alpha 2	220.193	63	20	803	5	eEF1alpha2	0.896	0.955	0.38349	0.705633	113.8	109.8	91.3	85.1	0		0
High	Q9NJH0	Elongation factor 1-gamma	175.993	48	19	404	19	eEF1gamma	0.95	0.915	0.745801	0.46742	119.5	110.4	88.3	81.8	0		0
High	Q9VJC7	Elongation factor Ts, mitochondrial	16.628	16	3	14	3	mEFTs	0.861	1.09	0.365873	0.488277	123.9	95.2	88.7	92.2	0		0
Low	Q9VQZ6	Elongator complex protein 3	1.4	1	1	5	1	Elp3	0.802	0.899	0.189265	0.379783	93.8	76.3	121.9	108	0		0
High	Q8T390	Endophilin-A	69.917	36	12	165	12	EndoA	0.979	1.115	0.964099	0.37904	88.4	92	106.6	113.1	0		0
High	P29844	Endoplasmic reticulum chaperone BiP	250.704	48	30	654	25	Hsc70-3	0.974	1.004	0.92132	0.978745	104.3	106.4	96.1	93.2	0		0
High	P15007	Enolase	337.419	59	25	1079	25	Eno	0.927	1.042	0.580481	0.741903	99.1	95.3	101.3	104.3	0		0
High	Q9V6U9	Enoyl-[acyl-carrier-protein] reductase, mitochondrial	84.721	49	12	99	12		0.988	1.033	0.972634	0.793322	78.8	85	118.5	117.7	0		0
High	Q9W1Y1	ER membrane protein complex subunit 8/9 homolog	9.731	16	2	2	2	EMC8-9	0.857	1.054	0.472229	0.675297	80.8	80.4	112.2	126.7	0		0
High	P08171	Esterase-6	118.526	48	18	206	18	Est-6	0.741	0.519	0.00830785	9.06573e-08	151.7	107.5	90.7	50.1	0		0
High	P54352	Ethanolamine kinase	10.341	4	1	18	1	eas	0.751	0.92	0.160552	0.493661	160.1	117.1	63	59.8	0		0
High	Q02748	Eukaryotic initiation factor 4A	155.486	46	19	375	19	eIF4A	0.925	1.015	0.560459	0.907578	106.9	103.2	94.8	95.1	0		0
High	Q9VPH7	Eukaryotic peptide chain release factor subunit 1	15.163	13	4	13	4	eRF1	0.974	0.938	0.909474	0.596912	86.1	105.3	106.1	102.5	0		0
High	P13060	Eukaryotic translation elongation factor 2	323.464	61	41	789	41	eEF2	0.943	0.88	0.689714	0.296505	120.5	114	87.8	77.7	0		0
High	P41374	Eukaryotic translation initiation factor 2 subunit 1	16.988	15	6	40	6	eIF2alpha	1.106	0.961	0.277216	0.740861	92.7	96.4	108.8	102.1	0		0
Low	P41375	Eukaryotic translation initiation factor 2 subunit 2	1.467	2	1	4	1	eIF2beta	2.465	0.753	3.38486e-09	0.0205298	55.5	136.8	116.7	91	0		0
High	Q24208	Eukaryotic translation initiation factor 2 subunit 3	71.296	35	12	118	12	eIF2gamma	0.952	0.952	0.757435	0.686859	102.1	99.5	111.4	87	0		0
High	Q9VNX8	Eukaryotic translation initiation factor 2A	5.431	2	1	5	1		0.973	0.84	0.992764	0.153477	102.8	102	106.1	89	0		0
High	Q9VN25	Eukaryotic translation initiation factor 3 subunit A	71.135	13	14	124	14	eIF3a	0.981	0.955	0.9768	0.702623	114.3	116.2	85.8	83.7	0		0
High	Q0E940	Eukaryotic translation initiation factor 3 subunit B	29.511	11	4	51	4	eIF3b	0.837	0.983	0.195458	0.885178	78.9	99.6	111.4	110.2	0		0
High	A1ZAX1	Eukaryotic translation initiation factor 3 subunit C	44.626	13	11	51	11	eIF3c	0.898	0.93	0.396314	0.547802	112.1	102.9	93.9	91.2	0		0
High	Q9VCK0	Eukaryotic translation initiation factor 3 subunit D-1	37.468	14	4	47	4	eIF3d1	0.885	0.997	0.35168	0.972335	118	102	90.3	89.7	0		0
High	O77410	Eukaryotic translation initiation factor 3 subunit E	25.59	14	5	54	5	eIF3e	0.875	0.97	0.32439	0.797078	94.9	100.4	111.9	92.9	0		0
High	Q9VN50	Eukaryotic translation initiation factor 3 subunit F-1	12.48	11	3	30	3	eIF3f1	1.115	1.026	0.245378	0.837921	72.7	86.2	117.3	123.8	0		0
High	Q9W4X7	Eukaryotic translation initiation factor 3 subunit G-1	13.994	5	2	3	2	eIF3g1	0.908		0.734272		209.6	190.4			0		0
High	Q9U9Q4	Eukaryotic translation initiation factor 3 subunit H	6.698	4	1	19	1	eIF3h	0.648	0.999	0.0183909	0.988077	152.6	99	74.1	74.3	0		0
High	O02195	Eukaryotic translation initiation factor 3 subunit I	32.574	22	5	29	5	eIF3i	0.959	1	0.80902	0.995473	101.2	126.4	101.3	71	0		0
High	Q7K550	Eukaryotic translation initiation factor 3 subunit J	25.235	26	4	42	4	eIF3j	0.798	0.936	0.071499	0.586438	114.6	92.7	99.5	93.2	0		0
High	Q9W2D9	Eukaryotic translation initiation factor 3 subunit K	34.02	26	4	54	4	eIF3k	1.262	0.935	0.0210685	0.579424	144.2	167.2	44.1	44.5	0		0
High	Q9VTU4	Eukaryotic translation initiation factor 3 subunit L	27.779	13	6	32	6	eIF3l	1.001	1	0.873237	0.994325	83.6	87.6	113.2	115.5	0		0
High	Q7JVI3	Eukaryotic translation initiation factor 3 subunit M	37.8	23	6	62	6	eIF3m	0.871	0.996	0.257267	0.968739	121.6	104.1	86.4	87.9	0		0
High	P48598	Eukaryotic translation initiation factor 4E1	17.921	19	2	19	2	eIF4E1	1.203	0.961	0.0822213	0.7389	118.5	136.5	74.4	70.6	0		0
High	Q9VXK6	Eukaryotic translation initiation factor 5	10.063	6	2	7	2	eIF5	1.016	1.072	0.794016	0.577349	71.6	88.4	117.7	122.3	0		0
High	Q9GU68	Eukaryotic translation initiation factor 5A	55.933	43	9	144	9	eEF5	0.976	0.882	0.941172	0.304394	88.2	91.9	115.8	104.1	0		0
High	P56538	Eukaryotic translation initiation factor 6	5.478	10	1	8	1	eIF6	0.969	1.595	0.999527	0.000144727	114.9	112.1	66.8	106.2	0		0
High	Q9VZS3	Eukaryotic translation initiation factor eIF1	26.55	52	5	25	5	eIF1	1.011	0.932	0.798684	0.562549	107.6	106.9	95.8	89.8	0		0
High	Q9TVM2	Exportin-1	40.227	10	8	38	8	emb	0.981	1.106	0.985762	0.415438	119.7	114.6	88.3	77.4	0		0
High	Q9XZU1	Exportin-2	12.592	7	5	12	5	Cse1	0.992	1.128	0.980789	0.328968	103.9	115.9	84.2	96	0		0
Medium	Q7JR71	Extracellular superoxide dismutase [Cu-Zn]	2.011	4	1	19	1	Sod3	0.968	0.854	0.864493	0.194669	85.7	80.9	126.7	106.7	0		0
High	A1Z8N1	Facilitated trehalose transporter Tret1-1	8.192	3	4	13	4	Tret1-1	1.001	1.229	0.872319	0.0942119	104.9	95	91.8	108.3	0		0
High	Q9W2N0	F-actin-capping protein subunit alpha	25.775	18	3	47	3	cpa	0.908	1.289	0.485935	0.039438	122.6	115.6	54.2	107.6	0		0
High	P48603	F-actin-capping protein subunit beta	7.568	7	2	22	2	cpb	0.977	1.123	0.910579	0.346739	105.1	104.5	89.5	100.9	0		0
High	Q95RI5	Failed axon connections	200.989	60	20	560	20	fax	1.011	1.175	0.803337	0.190341	97.2	102.5	92.3	108.1	0		0
High	Q95RN0	FAM172 family protein homolog CG10038	4.994	5	1	4	1		0.713	1.173	0.107288	0.19482	132.3	91.8	77.5	98.4	0		0
High	P10674	Fasciclin-1	277.247	44	27	744	27	Fas1	0.974	1.095	0.92111	0.465492	94	89.5	103.4	113	0		0
High	P34082	Fasciclin-2	47.375	13	8	62	8	Fas2	1.125	0.962	0.212041	0.748853	105.3	125.9	113.9	54.9	0		0
High	P15278	Fasciclin-3	16.92	11	4	12	4	Fas3	0.858	1.091	0.342487	0.480285	34.5	57.4	141	167	0		0
High	Q9VRJ2	Fat storage-inducing transmembrane protein	8.54	5	1	2	1	Fitm2	1.211	0.922	0.251547	0.503436	106.6	126.8	86.7	79.9	0		0
High	Q9V9S8	Ferrochelatase, mitochondrial	40.743	22	7	74	7	FeCh	0.91	0.98	0.464306	0.862718	100.8	93.9	103.8	101.5	0		0
High	Q9VQN8	Fidgetin-like protein 1	2.865	2	1	1	1		0.819	0.993	0.297297	0.946515	102.2	84.3	107.1	106.4	0		0
High	Q9VEN1	Filamin-A	118.8	13	22	118	22	cher	1.202	1.135	0.0631271	0.30374	65.7	82.6	114.9	136.8	0		0
High	Q9VL78	FK506-binding protein 59	20.963	10	4	33	4	Fkbp59	0.889	0.894	0.366933	0.35909	103.8	92.5	108.5	95.2	0		0
High	O61491	Flotillin-1	40.268	19	7	101	7	Flo1	1.071	1.015	0.431585	0.910912	77.6	82.7	117.1	122.6	0		0
Medium	P10552	FMRFamide-related peptides	1.931	3	1	6	1	FMRFa	100	0.821	1e-17	0.105894		67.5	168.6	163.9	0		0
High	P37236	Frequenin-1	29.912	32	6	117	6	Frq1	1.21	1.085	0.0544108	0.510373	83.3	94.9	106.5	115.3	0		0
High	P07764	Fructose-bisphosphate aldolase	424.057	74	29	1561	1	Ald1	0.972	1.004	0.909131	0.978786	98.9	95.5	101.7	103.8	0		0
High	P16378	G protein alpha o subunit	104.63	55	17	277	16	Galphao	1.036	1.026	0.635479	0.840336	89.3	96	106.3	108.4	0		0
High	P23625	G protein alpha q subunit	138.376	52	17	388	8	Galphaq	1.053	0.955	0.529057	0.700907	94.3	102.6	103.8	99.3	1	Acetyl [N-Term]	0
High	P20354	G protein alpha s subunit	24.784	19	7	77	6	Galphas	1.013	0.953	0.790643	0.6916	99.7	108.6	97.9	93.9	0		0
High	P32865	G protein-coupled receptor kinase 1	12.036	6	3	19	3	Gprk1	1.028	1.138	0.738282	0.296105	52.8	87.3	114	146	0		0
High	Q9V6X7	GDP-fucose protein O-fucosyltransferase 1	3.654	3	1	4	1	O-fut1	1.038	0.544	0.701837	6.78761e-07	97.8	102.6	130.3	69.3	0		0
High	Q07171	Gelsolin	90.143	19	13	158	13	Gel	1.029	0.985	0.678197	0.899033	99.6	93.8	103.3	103.2	0		0
High	P54192	General odorant-binding protein 19d	134.837	69	10	261	10	Obp19d	0.952	0.725	0.755575	0.00865966	101	101	114.7	83.3	0		0
High	Q9V8Y2	General odorant-binding protein 56a	8.347	19	3	22	3	Obp56a	1.011	0.559	0.816292	2.05737e-06	12	57.6	221.4	108.9	0		0
High	Q8SY61	General odorant-binding protein 56d	83.068	68	8	271	8	Obp56d	1.175	1.347	0.099101	0.0154147	78.3	92.1	98.3	131.3	0		0
Medium	Q8MMF9	General odorant-binding protein 57d	1.569	4	1	13	1	Obp57d	1.15	1	0.297656	0.992704	73.3	85.7	119.9	121.1	0		0
High	Q9VAJ4	General odorant-binding protein 99a	22.229	37	6	57	6	Obp99a	1.592	0.747	7.50447e-06	0.0172612	99.3	154.7	83.9	62.2	0		0
High	Q9VAI6	General odorant-binding protein 99b	39.371	46	5	59	5	Obp99b	1.36	1.018	0.00260338	0.886917	163.7	227.6	4.2	4.5	0		0
High	Q95RA9	GILT-like protein 1	66.429	54	9	80	9	GILT1	0.865	1.001	0.231068	1	104	84.4	107	104.7	0		0
High	Q9VMP9	Glucosamine-6-phosphate isomerase	37.126	30	5	38	5	Oscillin	0.994	1.165	0.926948	0.216553	125.3	119.4	59.9	95.4	0		0
Medium	P18173	Glucose dehydrogenase [FAD, quinone]	1.93	1	1	11	1	Gld	1.205	0.961	0.180001	0.738287	99.6	122.4	90	88.1	0		0
High	Q8IRI6	Glucose transporter type 1	6.765	1	1	22	1	Glut1	0.821	0.99	0.370402	0.926404	112.7	88.4	100.8	98.1	0		0
High	P12646	Glucose-6-phosphate 1-dehydrogenase	23.133	10	3	29	3	Zw	0.802	1.033	0.0565009	0.795264	105.3	90.1	92.2	112.3	0		0
High	P52029	Glucose-6-phosphate isomerase	270.807	57	25	531	25	Pgi	0.862	0.943	0.21593	0.6294	110.1	107.1	89.4	93.5	0		0
High	P33438	Glutactin	178.34	36	24	217	24	Glt	1.119	0.414	0.232317	6.13731e-13	77.7	84	170	68.2	0		1	Phospho [S812(100)]
High	P20228	Glutamate decarboxylase	136.214	35	14	419	14	Gad1	0.837	0.966	0.132423	0.773934	102.3	91.8	103.8	102.1	0		0
High	P54385	Glutamate dehydrogenase, mitochondrial	291.47	68	29	806	2	Gdh	1.007	1.078	0.827623	0.546491	90.7	92.4	103.8	113.2	0		0
High	Q94900	Glutamate-gated chloride channel	6.413	4	2	11	2	GluClalpha	1.163	1.059	0.244124	0.643473	82.1	99.7	105.5	112.7	0		0
High	P20477	Glutamine synthetase 1, mitochondrial	176.213	40	14	348	14	Gs1	1.012	1.007	0.794192	0.961464	85.1	85.7	112.4	116.9	0		0
High	P20478	Glutamine synthetase 2 cytoplasmic	158.04	56	15	568	15	Gs2	0.959	0.862	0.812845	0.222376	101.3	97.9	107.6	93.2	0		0
High	P20432	Glutathione S-transferase D1	109.226	55	13	349	13	GstD1	0.954	1.201	0.773095	0.137727	84.6	84.8	103.8	126.7	0		0
Medium	Q7JYX0	Glutathione S-transferase E14	1.899	6	1	3	1	GstE14	0.773	0.951	0.152351	0.678282	85.3	63.6	129.8	121.2	0		0
High	P41043	Glutathione S-transferase S1	60.305	34	9	121	9	GstS1	0.792	0.816	0.0435181	0.0965607	136.2	115.9	76	71.9	0		0
High	P07486	Glyceraldehyde-3-phosphate dehydrogenase 1	289.88	76	20	880	7	Gapdh1	0.94	1.043	0.669587	0.736829	109.1	99.6	92.9	98.5	0		0
High	P07487	Glyceraldehyde-3-phosphate dehydrogenase 2	320.609	77	20	919	7	Gapdh2	0.959	0.984	0.808149	0.8893	114.1	105.4	92.3	88.1	0		0
High	P13706	Glycerol-3-phosphate dehydrogenase [NAD(+)], cytoplasmic	360.684	82	26	1100	26	Gpdh1	0.99	1.169	0.958394	0.205431	98.1	104.6	91.8	105.5	0		0
High	Q9U616	Glycine cleavage system H protein, mitochondrial	20.716	24	3	38	3	ppl	0.896	0.835	0.38482	0.141167	123.7	112.3	89.7	74.3	0		0
High	Q9VFC8	Glycogen [starch] synthase	210.518	44	26	482	26	GlyS	0.836	0.858	0.127525	0.211301	115.6	100.6	98.9	84.9	0		0
High	Q9XTL9	Glycogen phosphorylase	587.027	73	62	1846	62	GlyP	0.89	1.013	0.349074	0.921845	119.7	107.3	85.7	87.2	0		0
Medium	Q9VVY3	Glycogen-binding subunit 76A	1.603	1	1	2	1	Gbs-76A	1.454	8.986	0.0399013	1e-17	50	76.1	27.4	246.4	0		0
High	Q9VQ93	Golgi phosphoprotein 3 homolog sauron	6.98	5	1	3	1	sau	1.083	1.094	0.523967	0.467756	87.5	103.3	98.6	110.6	0		0
High	Q9VZM5	GPI mannosyltransferase 3	10.578	6	2	12	2	PIG-B	1.033	1.106	0.745398	0.414912	106.6	110.9	85.3	97.2	0		0
High	Q08012	Growth factor receptor-bound protein 2	18.755	26	5	41	5	drk	0.884	1.142	0.318624	0.282057	172.8	113.5	55.9	57.7	0		0
High	P48604	GrpE protein homolog, mitochondrial	23.184	27	5	20	5	Roe1	0.851	0.947	0.326742	0.650992	68.3	53	139.2	139.5	0		0
High	P48596	GTP cyclohydrolase 1	3.582	4	1	1	1	Pu	1.517		0.00204791		158.9	241.1			0		0
High	Q9VIH7	GTPase-activating protein skywalker	2.376	2	1	1	1	sky	0.626	0.835	8.31055e-05	0.139143	154.7	91.1	84.8	69.3	0		0
High	Q9VZ23	GTP-binding nuclear protein Ran	58.762	67	11	104	11	Ran	0.971	0.983	0.897622	0.883957	110.5	106.5	93	90	0		0
High	P32234	GTP-binding protein 128up	9.918	8	2	15	2	128up	0.804	0.912	0.166588	0.447487	117.6	96.7	97.2	88.5	0		0
High	Q9VND8	GTP-binding protein Rheb homolog	5.166	10	2	11	2	Rheb	0.626	0.933	0.00123442	0.569873	213.7	134.6	24.7	27	0		0
High	Q9VMY9	Guanine deaminase	67.871	29	8	45	8	DhpD	1.127	1.032	0.208474	0.804685	116.5	126.6	77.7	79.2	0		0
High	P26308	Guanine nucleotide-binding protein subunit beta-1	134.431	51	13	262	13	Gbeta13F	0.976	1.028	0.935574	0.828869	95.6	93.6	102.4	108.3	1	Acetyl [N-Term]	0
High	P29829	Guanine nucleotide-binding protein subunit beta-2	141.095	47	17	586	17	Gbeta76C	1.157	1.041	0.131237	0.746333	90.6	104.6	100.2	104.6	0		0
High	O18640	Guanine nucleotide-binding protein subunit beta-like protein	138.718	68	17	337	17	Rack1	0.947	0.872	0.720988	0.261545	115.9	114.3	91.7	78.1	0		0
High	P38040	Guanine nucleotide-binding protein subunit gamma-1	27.37	50	3	56	3	Ggamma1	0.951	0.971	0.750989	0.804804	91.8	89.5	110.1	108.6	0		0
High	Q9NFZ3	Guanine nucleotide-binding protein subunit gamma-e	73.372	54	8	257	8	Ggamma30A	1.239	0.946	0.0321144	0.646122	81.5	97.5	110.4	110.6	0		0
High	O44081	H/ACA ribonucleoprotein complex subunit 4	2.328	3	1	1	1	Nop60B	1.124	1.375	0.212777	0.00956783	97.6	107.9	82	112.5	0		0
High	Q07093	Head-specific guanylate cyclase	24.121	8	4	39	4	Gycalpha99B	0.857	1	0.408899	0.996209	41.5	67.4	146.5	144.6	0		0
High	P11146	Heat shock 70 kDa protein cognate 2	31.524	6	3	77	1	Hsc70-2	0.94	1.06	0.757018	0.641626	94.8	90.3	105.1	109.8	0		0
High	P11147	Heat shock 70 kDa protein cognate 4	400.828	55	32	1182	25	Hsc70-4	1.059	1.103	0.493448	0.428025	96.3	102	95.8	105.9	0		0
High	P29845	Heat shock 70 kDa protein cognate 5	175.05	45	28	449	27	Hsc70-5	0.949	0.905	0.732316	0.410256	105.3	98.9	102.4	93.4	0		0
High	P02515	Heat shock protein 22	31.968	36	5	30	5	Hsp22	1.346	4.69	0.0801212	1e-17	11.5	12.9	56.3	319.3	0		0
High	P02516	Heat shock protein 23	90.201	58	8	178	8	Hsp23	1.055	0.987	0.518826	0.907525	128.1	133.5	69.5	68.9	0		0
High	P02517	Heat shock protein 26	13.913	20	3	20	3	Hsp26	1.133	1.307	0.291382	0.0296797	117.2	126.4	36.4	120	0		0
High	P02518	Heat shock protein 27	27.461	36	5	28	5	Hsp27	0.894	1.167	0.372895	0.211792	154.8	135.4	51.3	58.5	0		0
High	O02649	Heat shock protein 60A	198.719	50	24	414	24	Hsp60A	1.017	0.866	0.761879	0.237308	99.5	96.2	109.8	94.4	0		0
High	P22979	Heat shock protein 67B3	10.546	28	3	6	3	Hsp67Bc	1.793	2.223	7.08866e-05	7.90048e-11	148.8	125.4	52.3	73.5	0		0
High	O97125	Heat shock protein 68	65.215	13	6	141	3	Hsp68	0.992	1.323	0.955194	0.023076	58.6	57.4	87.2	196.8	0		0
High	P02828	Heat shock protein 83	323.942	52	40	858	40	Hsp83	1.018	1.083	0.75471	0.520069	97.6	101.1	100	101.4	0		1	Phospho [S219(100)]
High	P05205	Heterochromatin protein 1	16.329	20	3	18	3	Su(var)205	1.049	1.011	0.672783	0.932129	123.9	75.2	64.7	136.2	0		0
High	P48809	Heterogeneous nuclear ribonucleoprotein 27C	64.787	28	7	92	7	Hrb27C	0.951	1.066	0.748175	0.605118	132.1	128.8	87.4	51.7	0		0
High	P48810	Heterogeneous nuclear ribonucleoprotein 87F	28.558	21	6	20	5	Hrb87F	1.275	1.289	0.0158251	0.0394204	106	128.5	78.3	87.2	0		0
High	P07909	Heterogeneous nuclear ribonucleoprotein A1	9.711	6	2	7	1	Hrb98DE	1.633	1.243	0.00085971	0.0770486	98	156.6	65.1	80.2	0		0
High	Q6NNF2	High affinity cAMP-specific and IBMX-insensitive 3',5'-cyclic phosphodiesterase 8	3.279	3	1	4	1	Pde8	0.99	1.071	0.912373	0.581447	97.9	91.1	101.9	109.1	0		0
High	Q05783	High mobility group protein D	5.339	20	3	32	2	HmgD	1.092	1.025	0.335485	0.848341	104.8	112.1	83.8	99.2	0		0
High	Q06943	High mobility group protein Z	16.643	32	5	83	4	HmgZ	1.048	1.056	0.559553	0.663722	132.1	140.2	60.8	66.9	0		0
High	Q9VE46	High-affinity choline transporter 1	17.365	5	3	29	3	ChT	0.752	0.855	0.0597505	0.197964	131.8	57.5	103.6	107.1	0		0
High	Q94517	Histone deacetylase HDAC1	3.687	7	2	4	2	HDAC1	1.155	1.015	0.375165	0.910071	77.3	101	110.1	111.7	0		0
High	P02255	Histone H1	75.042	36	10	204	10	His1; His1:CG31617; His1:CG33804; His1:CG33810; His1:CG33813; His1:CG33816; His1:CG33819; His1:CG33822; His1:CG33825; His1:CG33828; His1:CG33831; His1:CG33837; His1:CG33840; His1:CG33843; His1:CG33846; His1:CG33849; His1:CG33852; His1:CG33864	1.116	1.178	0.240443	0.183601	72.3	97.1	100.4	130.3	0		1	Phospho [S2(99.5)]
High	P84051	Histone H2A	66.25	66	6	316	4	His2A; His2A:CG31618; His2A:CG33808; His2A:CG33814; His2A:CG33817; His2A:CG33820; His2A:CG33823; His2A:CG33826; His2A:CG33829; His2A:CG33832; His2A:CG33835; His2A:CG33838; His2A:CG33841; His2A:CG33844; His2A:CG33847; His2A:CG33850; His2A:CG33862; His2A:CG33865	0.973	1.158	0.913216	0.233753	102.7	86.1	96.9	114.4	0		0
High	P08985	Histone H2A.v	36.496	36	7	186	5	His2Av	1.097	1.05	0.312267	0.695105	90.6	102.2	101.2	106	0		0
High	P02283	Histone H2B	70.294	72	12	356	12	His2B; His2B:CG17949; His2B:CG33868; His2B:CG33870; His2B:CG33872; His2B:CG33874; His2B:CG33876; His2B:CG33878; His2B:CG33880; His2B:CG33882; His2B:CG33884; His2B:CG33886; His2B:CG33888; His2B:CG33890; His2B:CG33892; His2B:CG33894; His2B:CG33896; His2B:CG33898; His2B:CG33900; His2B:CG33902; His2B:CG33904; His2B:CG33906; His2B:CG33908; His2B:CG33910	1.003	1.098	0.862745	0.449529	80.1	83.5	113.3	123.1	0		0
High	P02299	Histone H3	39.279	65	10	292	2	His3; His3:CG31613; His3:CG33803; His3:CG33806; His3:CG33809; His3:CG33812; His3:CG33815; His3:CG33818; His3:CG33821; His3:CG33824; His3:CG33827; His3:CG33830; His3:CG33833; His3:CG33836; His3:CG33839; His3:CG33842; His3:CG33845; His3:CG33848; His3:CG33851; His3:CG33854; His3:CG33857; His3:CG33860; His3:CG33863; His3:CG33866	1.105	1.068	0.282023	0.594152	91.1	103.2	98.6	107	0		0
High	C0HL66	Histone H3.3A	52.134	58	9	307	1	His3.3A	1.092	4.778	0.466662	1e-17	172.9	197.3	6.4	23.4	0		0
High	P84040	Histone H4	69.186	60	8	351	8	His4; His4:CG31611; His4:CG33869; His4:CG33871; His4:CG33873; His4:CG33875; His4:CG33877; His4:CG33879; His4:CG33881; His4:CG33883; His4:CG33885; His4:CG33887; His4:CG33889; His4:CG33891; His4:CG33893; His4:CG33895; His4:CG33897; His4:CG33899; His4:CG33901; His4:CG33903; His4:CG33905; His4:CG33907; His4:CG33909; His4r	0.977	1.083	0.944716	0.521525	95.6	97.4	98.9	108.1	0		0
High	Q8INR6	Histone-lysine N-methyltransferase, H3 lysine-79 specific	2.146	1	1	1	1	gpp	1.727	1.043	0.00487636	0.737905	38.4	74.6	129.5	157.5	0		0
High	P13709	Homeotic protein female sterile	5.807	1	1	2	1	fs(1)h	0.953	0.539	0.944547	4.72967e-07	118.3	112.7	109.8	59.2	0		0
High	C4NYP8	Hsc70-interacting protein 1	54.625	24	8	108	8	HIP	1.059	0.964	0.496067	0.76048	88.4	97.2	110.3	104.1	0		0
High	Q24276	Hsp90 co-chaperone Cdc37	9.975	8	2	8	2	Cdc37	0.55	1.239	0.000287423	0.0823498	137.7	72.3	86.5	103.6	0		0
High	Q23997	Imaginal disk growth factor 6	133.47	44	18	273	17	Idgf6	1.205	0.97	0.0591378	0.797891	83.4	97.8	110.4	108.4	0		0
High	Q8ML70	Immune-induced peptides	97.934	49	10	166	10	BaraA1	1.008	1.05	0.824479	0.693892	69.1	73.1	124.6	133.2	0		0
High	O18388	Importin subunit beta	15.35	5	3	40	3	Fs(2)Ket	0.817	0.992	0.305532	0.941176	107.9	88.9	103.2	100	0		0
High	Q24008	Inactivation-no-after-potential D protein	165.112	42	26	328	26	inaD	1.075	1.035	0.413465	0.785479	103.4	112.5	89.6	94.6	0		0
High	Q9VG97	Inactive glutathione S-transferase D3	17.023	34	5	25	5	GstD3	0.807	0.832	0.077389	0.132845	123.9	84.7	102.9	88.5	0		0
High	O18373	Inactive selenide, water dikinase-like protein	49.962	24	6	98	6	Sps1	0.945	0.945	0.704369	0.6411	108	104.9	98.1	88.9	0		0
High	P27716	Innexin inx1	41.464	25	10	167	10	ogre	0.975	0.922	0.930925	0.505673	96.1	93.3	105.2	105.4	0		0
High	Q9V427	Innexin inx2	86.456	35	12	292	12	Inx2	1.013	0.896	0.790436	0.368325	93.4	93.7	110.8	102.2	0		0
High	Q9VAS7	Innexin inx3	8.125	5	1	1	1	Inx3	1.063	0.931	0.597289	0.555887	70	74.3	132.7	123	0		0
High	P33085	Innexin shaking-B	3.724	3	1	2	1	shakB	1.218	1.055	0.246138	0.666775	113.9	122.3	76.5	87.3	0		0
High	O77460	Inorganic pyrophosphatase	176.977	64	15	359	15	Nurf-38	0.824	0.972	0.0971066	0.810724	117.2	98.8	93.9	90.1	0		0
High	Q9VMW7	Inosine triphosphate pyrophosphatase	9.832	16	2	11	2		0.925	1.155	0.672033	0.242198	75.5	84.3	113.2	127.1	0		0
High	Q07152	Inosine-5'-monophosphate dehydrogenase	13.611	7	2	8	2	ras	0.893	0.922	0.404601	0.50149	132.4	106.7	82.8	78	0		0
Medium	P29993	Inositol 1,4,5-trisphosphate receptor	1.885	0	1	2	1	Itpr	0.01	1.156	1e-17	0.240806	39.7		167.8	192.5	0		0
High	Q9VR59	Inositol hexakisphosphate and diphosphoinositol-pentakisphosphate kinase	6.767	1	1	9	1	l(1)G0196	0.932	0.953	0.854787	0.692155	110	102.1	94.7	93.2	0		0
High	O97477	Inositol-3-phosphate synthase	89.596	29	12	154	12	Inos	1.143	0.932	0.162851	0.560101	92.7	114.1	101.1	92.2	0		0
High	P22817	Insulin-degrading enzyme	22.321	7	6	38	6	Ide	0.955	0.998	0.792018	0.97975	103.8	92.6	102.1	101.5	0		0
High	P11584	Integrin beta-PS	2.88	1	1	3	1	mys	1.141	1.313	0.393454	0.0268696	87.7	107.8	86.5	118	0		0
High	Q8T3X9	Iron-sulfur cluster assembly 1 homolog, mitochondrial	8.087	16	3	20	3	MagR	0.968	0.882	0.933639	0.301515	57.4	72.7	143.6	126.3	0		0
High	Q94519-2	Isoform 1 of Acyl carrier protein, mitochondrial	8.303	18	3	73	3	ND-ACP	1.043	0.944	0.591361	0.63219	96.6	104.3	102.2	96.9	0		0
High	P19351-12	Isoform 12 of Troponin T, skeletal muscle	213.546	48	32	837	3	up	1.072	1.14	0.426626	0.289617	89.5	93.3	101	116.2	0		1	Phospho [T323(100)]
High	Q9VA73-2	Isoform 2 of Calcium-binding mitochondrial carrier protein Aralar1	200.013	52	25	449	25	aralar1	0.813	0.959	0.0762072	0.727906	117	96.7	94.6	91.7	0		0
High	X2JAU8-2	Isoform 2 of Protein nervous wreck	143.117	24	23	264	23	nwk	1.106	1.004	0.279023	0.977463	94.6	99.2	102.7	103.6	0		1	Phospho [S1047(100)]
High	P36188-3	Isoform 2 of Troponin I	55.002	42	15	264	6	wupA	1.161	1.183	0.123257	0.172988	88.7	83.9	108.2	119.2	0		0
High	Q24048-2	Isoform 2.1 of Sodium/potassium-transporting ATPase subunit beta-2	112.129	60	14	393	14	nrv2	0.943	0.982	0.692251	0.878529	113.9	105.8	91.8	88.4	0		0
High	Q99323-4	Isoform 4 of Myosin heavy chain, non-muscle	127.219	14	20	144	20	zip	1.044	1.15	0.581339	0.256426	121.8	116	76.5	85.7	0		0
High	P36188-5	Isoform 4 of Troponin I	91.026	44	14	348	5	wupA	1.133	1.166	0.191268	0.21209	87.7	99.8	98.5	113.9	0		0
High	P19351-4	Isoform 4 of Troponin T, skeletal muscle	210.924	48	30	819	0	up	2.66	0.896	6.65563e-11	0.367651	34.2	91	145	129.8	0		1	Phospho [T331(100)]
High	P13607-5	Isoform 5 of Sodium/potassium-transporting ATPase subunit alpha	736.036	58	57	2543	1	Atpalpha	1.455	1.103	0.000276774	0.428745	84	120.3	93.2	102.5	0		0
High	P19351-5	Isoform 5 of Troponin T, skeletal muscle	261.869	48	31	930	2	up	1.274	1.161	0.0163884	0.226998	91	116.7	89.6	102.7	0		1	Phospho [T331(100)]
High	P13607-7	Isoform 7 of Sodium/potassium-transporting ATPase subunit alpha	722.375	58	55	2498	1	Atpalpha	1.273	1.077	0.0165254	0.551911	79.9	100.9	104.7	114.5	0		0
High	P36188-9	Isoform 8 of Troponin I	63.902	44	12	325	3	wupA	1.053	1.106	0.529119	0.414523	85.5	91.3	108.7	114.4	0		0
High	P25455-1	Isoform A of 1-phosphatidylinositol 4,5-bisphosphate phosphodiesterase classes I and II	50.668	12	11	66	11	Plc21C	0.911	1.021	0.47375	0.871987	62.3	80.7	146.5	110.4	0		0
High	Q26365-2	Isoform A of ADP,ATP carrier protein	239.721	76	25	1525	25	sesB	1.072	1.091	0.428535	0.480498	90.3	93.3	103.9	112.6	0		0
High	P22465-2	Isoform A of Annexin B10	135.02	61	15	298	1	AnxB10	0.849	1.132	0.222409	0.316233	127.9	113.6	74.2	84.2	0		0
High	P48610-2	Isoform A of Arginine kinase	473.731	45	30	1672	2	Argk1	1.014	1.115	0.78283	0.379373	92.8	92.6	101.8	112.7	0		0
High	Q9VZA4-2	Isoform A of Band 7 protein CG42540	31.207	21	7	76	1	CG42540									0		0
High	P22700-2	Isoform A of Calcium-transporting ATPase sarcoplasmic/endoplasmic reticulum type	599.67	55	54	1899	3	SERCA	1.017	1.122	0.757243	0.352843	89.3	88.7	105.3	116.8	1	Acetyl [N-Term]	0
High	P23625-2	Isoform A of G protein alpha q subunit	114.054	39	13	258	4	Galphaq	0.964	0.971	0.847773	0.804205	96.1	89.4	108.3	106.1	1	Acetyl [N-Term]	0
High	P10676-2	Isoform A of Neither inactivation nor afterpotential protein C	738.449	65	70	2122	3	ninaC	1.029	0.932	0.679463	0.562472	166.2	155.6	40.9	37.3	0		0
High	P17971-1	Isoform A of Potassium voltage-gated channel protein Shal	4.793	2	1	10	1	Shal	0.549	4.195	0.00398524	1e-17	165.5	90.8	27.7	116	0		0
High	Q04499-2	Isoform A of Proline dehydrogenase 1, mitochondrial	229.533	48	33	602	33	slgA	0.968	0.914	0.879814	0.461555	88.2	86.2	118.1	107.5	0		0
High	Q9VMM6-2	Isoform A of Protein obstructor-E	36.047	36	5	37	5	obst-E	0.968	0.884	0.881027	0.311347	88.7	104.6	107.1	99.5	0		0
High	Q9VQ79-1	Isoform A of Putative apoptosis-inducing factor 1, mitochondrial	28.392	14	6	24	6	AIF	0.934	0.966	0.687031	0.773602	96.5	82.1	114.2	107.1	0		0
High	Q02427-1	Isoform A of RNA-binding protein 1	19.573	26	3	47	3	Rbp1	1.033	1.105	0.649731	0.420606	124.4	121.5	73.9	80.3	0		0
High	Q08473-2	Isoform A of RNA-binding protein squid	50.121	33	7	82	7	sqd	0.897	0.92	0.390162	0.491578	111.3	110	92.3	86.4	0		0
High	P20348-2	Isoform A of Sex-regulated protein janus-A	18.345	18	1	27	1	janA	0.741	1.084	0.0461501	0.516215	115.9	85.8	95.7	102.6	0		0
High	P91938-2	Isoform A of Thioredoxin reductase 1, mitochondrial	222.499	68	23	383	22	Trxr1	0.796	1.08	0.0488332	0.53349	109.1	88.2	98.4	104.3	0		0
High	P29613-1	Isoform A of Triosephosphate isomerase	145.895	54	15	463	15	Tpi	0.826	0.863	0.102855	0.226439	111.9	92.2	104.9	90.9	0		0
High	P06754-2	Isoform A of Tropomyosin-1, isoforms 9A/A/B	147.042	73	23	497	1	Tm1	0.952	0.99	0.754605	0.930599	94.7	87.8	108.8	108.7	0		0
High	Q09103-3	Isoform B of Eye-specific diacylglycerol kinase	290.143	39	27	587	27	rdgA	0.977	0.948	0.94624	0.655835	103.8	102.7	98.2	95.3	0		1	Phospho [S18(100)]
High	O61492-2	Isoform B of Flotillin-2	91.802	40	14	193	14	Flo2	0.891	0.999	0.355992	0.987777	83.7	81.4	119.8	115	0		0
High	Q02645-2	Isoform B of Protein hu-li tai shao	308.691	54	28	613	28	hts	0.949	1.035	0.734162	0.781345	101.2	92	102.5	104.3	0		0
High	O62619-2	Isoform B of Pyruvate kinase	409.697	75	31	981	31	PyK	0.854	0.97	0.186581	0.796723	113.4	97.2	95.9	93.5	0		0
High	Q9I7U4-3	Isoform B of Titin	48.142	1	12	36	12	sls	1.255	1.029	0.0237137	0.818571	118.9	132.3	72.4	76.4	0		0
High	Q9V3J1-2	Isoform B of V-type proton ATPase subunit H	176.991	47	20	461	1	VhaSFD	1.01	0.995	0.809866	0.961657	78.2	80.6	121.8	119.4	0		0
High	P05661-2	Isoform BDBBA of Myosin heavy chain, muscle	2186.7	66	173	6870	5	Mhc	0.928	1.242	0.587533	0.0788223	110.9	104.6	81.6	102.9	0		0
High	P07764-3	Isoform Beta of Fructose-bisphosphate aldolase	415.718	77	29	1514	1	Ald1	0.96	1.063	0.815823	0.620736	128.4	126.6	71.1	73.9	0		0
High	P29310-3	Isoform C of 14-3-3 protein zeta	121.885	63	14	611	3	14-3-3zeta	1.061	1.011	0.485079	0.933174	95.9	103.5	100	100.6	0		0
High	P22464-3	Isoform c of Annexin B9	133.468	62	20	461	20	AnxB9	1.17	1.124	0.10777	0.344943	79.3	87.3	110.4	123	0		0
High	P54385-2	Isoform C of Glutamate dehydrogenase, mitochondrial	284.2	68	28	785	1	Gdh	0.664	1.041	0.000249882	0.749929	118.7	74.5	101.3	105.5	0		0
High	Q9VCI3-3	Isoform C of Lipid storage droplets surface-binding protein 1	139.623	50	17	325	1	Lsd-1	1.083	0.717	0.511612	0.00657689	85.5	92.4	130.7	91.4	0		0
High	Q9NFU0-2	Isoform C of Synaptic functional regulator FMR1	10.989	5	2	2	2	Fmr1	1.03	1.235	0.737882	0.0872448	137.5	135.5	57.1	69.9	0		0
High	P92177-1	Isoform D of 14-3-3 protein epsilon	159.439	60	17	624	15	14-3-3epsilon	0.982	1.04	0.981307	0.755964	99.3	98.8	99.1	102.8	0		0
High	P05661-17	Isoform D of Myosin heavy chain, muscle	2153.61	66	173	6783	2	Mhc	1.175	1.301	0.098318	0.0323061	101.7	117.8	78.6	101.9	0		0
High	C0HK92-2	Isoform E of Uncharacterized protein CG45076	73.862	37	11	183	4	CG45076	0.646	1.04	0.000308906	0.755153	83.8	62.4	126.8	127	0		0
High	P09491-2	Isoform Embryonic of Tropomyosin-2	338.204	69	30	868	4	Tm2	0.994	1.198	0.928725	0.143682	98.8	106.4	89.3	105.5	0		0
High	P31007-4	Isoform F of Disks large 1 tumor suppressor protein	97.913	19	12	180	1	dlg1	0.994	1.086	0.882813	0.506682	107.8	105.2	97	90	0		0
High	P05661-19	Isoform F of Myosin heavy chain, muscle	2143.59	65	172	6758	1	Mhc	100	0.913	1e-17	0.455416		184.3	113.3	102.4	0		0
High	Q960T2-4	Isoform F of Synapse-associated protein of 47 kDa	261.629	49	15	428	15	Sap47	1.137	0.982	0.177784	0.874579	88.7	93.8	109.9	107.6	1	Acetyl [N-Term]	3	Phospho [S155(100); S166(100); T170(100)]
High	A1ZA47-5	Isoform G of PDZ and LIM domain protein Zasp	124.928	31	20	184	3	Zasp52	1.377	1.071	0.00177779	0.58072	85.7	125.7	89.4	99.2	0		0
High	Q01989-2	Isoform H of Myosin heavy chain 95F	24.11	4	6	25	6	jar	1.011	1.031	0.800612	0.809733	136.6	134.7	65	63.8	0		0
High	P53624-2	Isoform K of Mannosyl-oligosaccharide alpha-1,2-mannosidase IA	7.206	3	2	5	2	alpha-Man-Ia	1.072	0.919	0.549886	0.487946	101.4	110	105.2	83.4	0		0
High	Q7KRY7-10	Isoform K of Protein lap4	21.21	3	5	20	5	scrib	0.946	0.941	0.716232	0.612793	102.3	95	112.6	90.1	0		0
High	P06754-5	Isoform L of Tropomyosin-1, isoforms 9A/A/B	210.517	74	25	641	2	Tm1	0.88	0.994	0.297016	0.957738	93.8	105.7	97.4	103.1	0		0
High	P19339-5	Isoform MS16 of Protein sex-lethal	3.377	4	1	5	1	Sxl	0.86	1.062	0.536253	0.629351	121.6	110.9	81.3	86.2	0		0
High	P05130-2	Isoform Short of Protein kinase C, brain isozyme	22.135	11	7	85	3	Pkc53E	0.93	0.901	0.662721	0.393268	131.6	61.9	109.2	97.3	0		1	Phospho [T641(100)]
High	P29310-2	Isoform VI' of 14-3-3 protein zeta	121.523	61	13	603	2	14-3-3zeta	1.082	0.98	0.378111	0.863996	78.4	81.7	121.3	118.7	0		0
High	Q9TVP3	J domain-containing protein	70.155	51	8	179	8	jdp	0.921	0.923	0.539042	0.508315	93.4	91	111.6	104	0		0
High	P17210	Kinesin heavy chain	85.903	19	13	113	13	Khc	1.064	0.982	0.465255	0.875255	81.4	86.9	112.3	119.4	0		0
High	P46824	Kinesin light chain	17.611	9	4	53	4	Klc	0.886	1.1	0.359096	0.441211	77.6	80.5	119.8	122	0		0
Medium	P46867	Kinesin-like protein Klp68D	1.744	2	1	14	1	Klp68D	0.884	0.763	0.317793	0.0272428	113	98.8	107.2	81	0		0
Medium	Q9VB25	Kinesin-like protein Klp98A	1.575	1	1	11	1	Klp98A	1.086	1.26	0.561878	0.0604326	66.9	70.5	116.5	146.1	0		0
High	Q9V447	Krueppel homolog 2	42.555	35	8	91	8	Kr-h2	1.017	1.041	0.757691	0.745429	85.8	92.3	106.2	115.7	0		0
High	Q9VMC9	Kynurenine formamidase	2.487	2	1	6	1	KFase	0.747	0.862	0.104178	0.224098	120.4	84.1	105.4	90.1	0		0
High	P40796	La protein homolog	54.186	29	7	65	7	La	1.308	1.113	0.0121176	0.386065	63	86.2	120.6	130.2	0		0
High	Q24372	Lachesin	39.97	29	7	65	7	Lac	0.906	1.11	0.438814	0.400019	102	99.7	95.5	102.8	0		0
High	P08928	Lamin Dm0	242.893	55	35	535	34	Lam	1.106	1.048	0.277435	0.707559	102.2	111.6	88.2	97.9	0		1	Phospho [S595(99.3)]
High	Q8MLV1	Lamin-B receptor	7.015	2	1	18	1	LBR	1.199	1.332	0.259505	0.0199182	95.5	112.7	82.2	109.5	0		0
High	Q03427	Lamin-C	137.251	42	22	340	22	LamC	1.222	1.182	0.0437972	0.174552	98.7	110	90.7	100.6	0		0
High	Q00174	Laminin subunit alpha	17.244	2	3	22	3	LanA	0.831	1.069	0.246277	0.59197	89.3	54.2	129.6	126.9	0		1	Phospho [S3466(100)]
High	P11046	Laminin subunit beta-1	24.033	4	5	13	5	LanB1	1.074	1.111	0.417724	0.393015	113.9	104.3	90.6	91.2	0		0
High	P15215	Laminin subunit gamma-1	13.534	4	5	12	5	LanB2	1.19	1.046	0.0774954	0.720811	131.3	158.7	55	55	0		0
High	Q9VAW5	La-related protein 1	14.172	4	3	25	3	larp	1.079	0.903	0.531138	0.404619	124.9	137.2	72.4	65.6	0		0
High	Q9I7T7	La-related protein Larp4B	4.537	2	2	2	2	Larp4B	1.077	1.13	0.599815	0.323377	83.1	132.9	90.8	93.2	0		0
High	Q24388	Larval serum protein 2	26.122	9	5	9	5	Lsp2	0.378	0.598	1.33227e-14	2.795e-05	301.6	73.3	13.2	11.9	0		0
Medium	Q8T9B6	LDLR chaperone boca	1.901	4	1	2	1	boca	1.594	1.079	0.0050678	0.540604	47.2	79.9	130	142.9	0		0
High	Q9VG09	L-dopachrome tautomerase yellow-f	2.535	2	1	23	1	yellow-f	1.128	0.922	0.341947	0.503915	82.3	90.3	118.6	108.8	0		0
High	Q9VG08	L-dopachrome tautomerase yellow-f2	11.255	6	2	25	2	yellow-f2	0.845	0.786	0.327381	0.0493533	98.6	91.7	115.2	94.4	0		0
High	Q8I7C3	LIM and SH3 domain protein Lasp	17.311	6	3	21	3	Lasp	1.353	1.066	0.0173301	0.6061	97.4	128.4	81.7	92.5	0		0
High	Q9W0H3	Lipid droplet-associated hydrolase	16.178	13	3	24	3	sturkopf	0.688	0.773	0.00575232	0.0349845	116.6	78.4	115.5	89.5	0		0
High	Q9VCI3	Lipid storage droplets surface-binding protein 1	134.718	44	17	312	1	Lsd-1	1.056	0.751	0.509634	0.019093	74.4	79	141	105.6	0		0
High	Q9VXY7	Lipid storage droplets surface-binding protein 2	112.814	45	12	272	12	Lsd-2	1.075	0.761	0.40975	0.0259749	80	89.7	130.7	99.6	0		0
High	Q95028	L-lactate dehydrogenase	17.273	11	3	31	3	Ldh	1.212	1.438	0.0612871	0.00312249	105	136.6	65.3	93.1	0		0
High	Q09101	Locomotion-related protein Hikaru genki	5.497	2	1	2	1	hig	0.959	1.098	0.938162	0.450376	124	115	79.2	81.9	0		0
High	Q7KUT2	Lon protease homolog, mitochondrial	10.493	7	4	8	4	Lon	0.958	1.029	0.818549	0.818414	108.2	111.2	89.5	91.2	0		0
High	P82890	Low molecular weight phosphotyrosine protein phosphatase 1	5.322	10	2	8	2	primo-1	0.889	0.861	0.373067	0.219722	99.5	102.7	107.6	90.3	0		0
Low	Q9VMJ7	Lysine-specific demethylase lid	1.51	2	1	1	1	Kdm5	0.517	100	0.00118285	1e-17	272.6	102.3		25.1	0		0
Low	Q9VKH6	Lysosomal thioesterase PPT2 homolog	1.38	2	1	6	1	Ppt2	0.369	0.521	2.05225e-06	1.01653e-07	57	21.7	202.8	118.4	0		0
High	Q9W060	Lysosomal-trafficking regulator	2.45	0	1	3	1	mv	0.897	1.065	0.699728	0.611156	151.1	127	59.5	62.3	0		0
High	Q9W445	Malignant T-cell-amplified sequence 1 homolog	9.151	10	1	3	1	MCTS1	0.816		0.349761		217.2	182.8			0		0
High	Q9VXY2	MAP kinase-activating death domain protein	2.983	0	1	3	1	Rab3-GEF	0.811	1.001	0.363545	0.995501	81.5	65	126.7	126.7	0		0
Medium	Q8MPP3	Matrix metalloproteinase-2	1.856	1	1	5	1	Mmp2	0.858	1.457	0.514657	0.00219735	48	38.6	125.6	187.7	0		0
Medium	P55162	Membrane-associated protein Hem	1.576	1	1	2	1	Hem	0.963	1.343	0.960449	0.0164564	124.4	111.3	69.8	94.5	0		0
High	Q9XZ63	Mesencephalic astrocyte-derived neurotrophic factor homolog	10.943	13	2	10	2	Manf	0.848	0.864	0.468201	0.23015	65.5	37.1	158.2	139.2	0		0
High	P91685	Metabotropic glutamate receptor	3.585	2	1	1	1	mGluR	1.016		0.822203		201.9	198.1			0		0
High	Q8INK9	Methionine-R-sulfoxide reductase B1	7.069	13	2	5	2	SelR	1.008	1.044	0.823514	0.731868	116.4	112.9	80.6	90.1	0		0
High	Q9V9X4	Methylthioribose-1-phosphate isomerase	10.177	10	2	26	2		0.944	1.159	0.829666	0.231459	121.1	117.3	72.7	89	0		0
High	Q9VVH3	MICOS complex subunit MIC13 homolog QIL1	53.153	68	8	117	8	QIL1	0.867	1	0.238985	0.996019	106.2	80.9	106.8	106.1	0		0
High	P91928	MICOS complex subunit Mic60	224.742	51	36	582	36	Mitofilin	1.027	1	0.688991	0.994538	77.8	84.8	118.6	118.7	0		0
High	Q9W596	Microtubule-associated protein futsch	1024.74	45	153	1817	153	futsch	1.091	1.022	0.336558	0.866278	92.4	102.8	102.8	102	0		53	Phospho [S427(100); S1070(100); T1296(100); S1695(100); S2062(100); S2070(100); S2074(100); S2099(100); S2107(100); S2111(100); S2136(100); S2144(100); S2148(100); S2173(100); S2181(100); S2185(100); S2210(100); S2218(100); S2222(100); S2247(100); S2255(100); S2259(100); S2284(100); S2292(100); S2296(100); S2321(100); S2329(100); S2333(100); S2734(100); S2875(100); S3027(100); S3035(100); S3194(1…
High	Q9I7K0	Microtubule-associated protein Jupiter	10.037	12	2	13	2	Jupiter	1.367	1.11	0.0111993	0.399374	78.3	105.3	100.6	115.9	0		0
Medium	B7YZT2	Mitochondrial fission 1 protein	1.935	10	1	1	1	Fis1	1.136		0.407532		188.3	211.7			1	Acetyl [N-Term]	0
High	Q9W2D6	Mitochondrial import inner membrane translocase subunit Tim10	2.685	9	1	10	1	Tim10	1.265	0.984	0.100053	0.891295	77.9	99.8	112.7	109.6	0		0
High	Q9VTJ8	Mitochondrial import inner membrane translocase subunit TIM14	11.618	17	1	22	1	Tim14	2.61	1.986	3.54205e-07	2.37071e-08	75.6	193	44.3	87.1	0		0
High	Q9VF08	Mitochondrial import inner membrane translocase subunit Tim16	21.24	30	3	35	3	blp	0.919	0.916	0.56324	0.468596	110.6	102.9	95.4	91.1	0		0
High	Q9W4V8	Mitochondrial import inner membrane translocase subunit TIM50-C	13.354	9	3	20	3	ttm50	1.032	1.026	0.754522	0.839083	118.1	126.6	77.8	77.5	0		0
High	Q9Y1A3	Mitochondrial import inner membrane translocase subunit Tim8	24.833	55	3	40	3	Tim8	0.797	0.945	0.0496217	0.640177	135.4	100.7	83.1	80.8	0		0
High	Q9VYD7	Mitochondrial import inner membrane translocase subunit Tim9	15.498	28	2	16	2	Tim9a	1.062	0.794	0.500319	0.0591378	98.4	96.5	117	88.1	0		0
High	Q9U4L6	Mitochondrial import receptor subunit TOM40 homolog 1	30.981	27	6	39	6	Tom40	1.029	0.943	0.678353	0.628765	107.2	115.7	90.8	86.3	0		0
High	P91927	Mitochondrial proton/calcium exchanger protein	45.543	9	7	73	7	Letm1	0.919	0.837	0.553068	0.146046	91.5	88.8	110.9	108.8	0		0
High	Q7KSC4	Mitochondrial pyruvate carrier 1	19.74	28	2	38	2	Mpc1	1.051	0.93	0.538816	0.551506	104.1	108	96.6	91.2	0		0
High	Q9VAY3	Mitoferrin	6.896	10	2	4	2	mfrn	0.81	1.064	0.329048	0.619396	115.2	89.6	98.2	97.1	0		0
High	P40417	Mitogen-activated protein kinase ERK-A	24.858	19	5	36	5	rl	0.93	1.04	0.620434	0.752635	93.7	97.5	99.6	109.2	0		0
High	O62618	Mitogen-activated protein kinase p38a	3.481	3	1	1	1	p38a	0.957	0.939	0.93377	0.60219	82.2	75	125.6	117.2	0		0
High	Q86B87	Modifier of mdg4	2.928	2	1	1	1	mod(mdg4)	0.724	1.052	0.0316374	0.683403	136.6	93.6	81.5	88.3	0		0
High	P46150	Moesin/ezrin/radixin homolog 1	81.35	22	17	206	17	Moe	0.964	1.034	0.846255	0.788404	97	102.7	100.4	99.9	0		0
High	Q9VN91	MORN repeat-containing protein 4 homolog	106.85	69	9	250	9	rtp	1.013	0.951	0.789183	0.678417	111.4	114.4	91.7	82.5	0		0
High	Q00748	Multidrug resistance protein homolog 65	71.227	12	9	108	9	Mdr65	1.003	0.936	0.859232	0.583945	92.4	94.4	113.4	99.8	0		0
High	Q9I7S8	Multifunctional protein ADE2	215.066	58	23	581	23	Paics	0.885	1.302	0.32305	0.0320569	130.1	119	66.1	84.9	0		0
High	Q9VV72	Multiple inositol polyphosphate phosphatase 1	58.316	27	11	95	11	Mipp1	1.005	1.027	0.848249	0.834239	108.7	105	93.5	92.8	0		0
High	P53777	Muscle LIM protein 1	76.785	62	6	157	5	Mlp60A	1.149	1.105	0.149539	0.420161	86	85.5	111.5	117	0		0
High	Q24400	Muscle LIM protein Mlp84B	102.971	37	13	241	12	Mlp84B	1.154	1.093	0.138013	0.47284	89	98.3	102.4	110.3	0		0
High	P14318	Muscle-specific protein 20	73.514	66	11	174	11	Mp20	0.848	0.984	0.166138	0.887097	83.1	69.7	122.6	124.6	0		0
High	Q9W5E4	Myb-binding protein 1A	2.777	1	1	4	1	Mybbp1A	1.298	0.964	0.162142	0.759345	43.4	54.3	153.9	148.4	0		0
High	P06742	Myosin light chain alkali	71.347	30	6	258	6	Mlc1	0.875	1.133	0.274326	0.310767	98.2	82.7	105.7	113.4	0		0
High	P18432	Myosin regulatory light chain 2	337.212	86	17	827	17	Mlc2	1.095	1.094	0.320545	0.466753	95.2	96.1	99.8	109	0		2	Phospho [S48(99.6); S66(100)]
High	P40423	Myosin regulatory light chain sqh	8.532	13	2	29	2	sqh	0.938	0.972	0.69057	0.810977	111.3	116.1	87.1	85.5	0		0
High	P54357	Myosin-2 essential light chain	52.382	65	8	88	8	Mlc-c	1.052	1.098	0.53298	0.448177	95.5	101.4	97.7	105.3	0		0
High	Q9I7I7	NAD-dependent protein deacetylase Sirt2	15.095	8	2	18	2	Sirt2	1.136	1.209	0.360027	0.123046	106.5	114	77.6	101.9	0		0
Medium	Q9VAQ1	NAD-dependent protein deacetylase Sirt7	1.899	3	1	7	1	Sirt7	0.551	1.882	6.79012e-08	2.63435e-07	189.2	110.9	35.9	64	0		1	Phospho [T358(99)]
High	Q9VF27	NADH dehydrogenase (ubiquinone) 23 kDa subunit	78.763	51	10	151	10	ND-23	0.801	0.989	0.0552127	0.924468	114.4	103.1	90	92.4	0		0
High	P91929	NADH dehydrogenase [ubiquinone] 1 alpha subcomplex subunit 10, mitochondrial	114.68	38	13	264	13	ND-42	0.868	1.014	0.240484	0.91444	103.8	90.6	101.9	103.7	0		0
High	Q9VZU4	NADH dehydrogenase [ubiquinone] iron-sulfur protein 3, mitochondrial	162.042	66	17	386	17	ND-30	0.903	0.972	0.425095	0.813768	103.1	100.1	100.5	96.3	0		0
High	Q9VWI0	NADH dehydrogenase [ubiquinone] iron-sulfur protein 4, mitochondrial	45.916	29	4	113	4	ND-18	0.983	0.963	0.989819	0.751663	115.3	102.7	92.4	89.6	0		0
High	Q94511	NADH-ubiquinone oxidoreductase 75 kDa subunit, mitochondrial	313.297	55	30	629	30	ND-75	0.922	0.989	0.542915	0.923885	100.4	93.5	103.6	102.6	0		0
High	P18929	NADH-ubiquinone oxidoreductase chain 1	6.094	7	2	30	2	mt:ND1	1.052	1.026	0.589927	0.839734	90.3	88.9	110.2	110.6	0		0
High	P18930	NADH-ubiquinone oxidoreductase chain 3	4.371	9	1	24	1	mt:ND3	1.023	0.935	0.718567	0.582025	102.2	105.7	99.2	92.8	0		0
High	P18932	NADH-ubiquinone oxidoreductase chain 5	17.917	3	1	26	1	mt:ND5	0.782	1.052	0.0399673	0.682015	123.5	96.8	87.9	91.8	0		0
High	Q27597	NADPH--cytochrome P450 reductase	82.418	28	15	145	15	Cpr	0.948	0.841	0.729518	0.157582	92.7	90.8	118.7	97.8	0		0
High	Q94518	Nascent polypeptide-associated complex subunit alpha	73.246	54	7	131	7	Nacalpha	1.175	0.898	0.0982	0.375354	87.9	109.3	105.6	97.2	0		0
High	Q9VXB0	NECAP-like protein CG9132	28.71	33	5	85	5		1.057	1.037	0.503634	0.774018	116.9	103.6	87.6	91.9	0		0
High	Q9VJ33	NEDD8	13.208	33	2	31	2	Nedd8	0.854	0.917	0.282403	0.475859	112.4	92.3	103.1	92.3	0		0
Low	Q9VSF3	Nedd8-conjugating enzyme UbcE2M	1.384	6	1	1	1	UbcE2M	1.089	1.343	0.488569	0.0165631	109.6	121.6	69.2	99.5	0		0
High	P10676	Neither inactivation nor afterpotential protein C	885.125	63	88	2543	21	ninaC	0.997	0.982	0.906919	0.875955	101.1	103.3	99	96.6	0		1	Phospho [S1410(99.2)]
High	O15943	Neural-cadherin	2.877	1	1	4	1	CadN	1.032	0.778	0.726757	0.0400906	100.2	103.5	110.3	86	0		0
High	Q94887	Neurexin-4	38.08	8	9	74	9	Nrx-IV	1.006	1.022	0.839036	0.862347	113.8	96.8	98.4	90.9	0		0
High	P42325	Neurocalcin homolog	36.373	42	7	80	7	Nca	1.022	0.969	0.724004	0.790095	68.8	70.8	131.2	129.3	0		0
High	Q9VI25	Neurochondrin homolog	11.613	3	2	30	2	Neurochondrin	1.076	1.193	0.501529	0.152434	87.2	99.6	101.7	111.5	0		0
High	P20241	Neuroglian	173.865	28	27	319	27	Nrg	1.034	0.985	0.648157	0.896228	100.9	105.9	97.4	95.9	0		0
High	Q9W0W6	Neuropeptide-like 1	6.637	5	1	2	1	Nplp1	0.841	1.017	0.325476	0.892868	104.1	83.9	104.9	107.1	0		0
High	Q9VU58	Neuropeptide-like 2	40.458	51	5	296	5	Nplp2	1.352	0.891	0.00311741	0.341966	74.1	97	120.8	108.1	0		0
Medium	Q8ITC7	Neuropeptides capa receptor	1.758	1	1	3	1	CapaR	0.749	0.95	0.194971	0.672316	45.5	31	169.6	153.9	0		0
High	P23654	Neurotactin	9.463	6	3	45	3	Nrt	0.818	1.11	0.0851325	0.399529	114	93.1	88.2	104.6	0		0
High	Q9VA70	Neutral ceramidase	2.721	2	1	1	1	CDase	1.421	1.081	0.0510681	0.532286	63.6	91.1	115.6	129.7	0		0
High	Q03017	NF-kappa-B inhibitor cactus	3.733	3	1	1	1	cact									0		0
High	Q8SY96	NFU1 iron-sulfur cluster scaffold homolog, mitochondrial	8.473	8	2	18	2		0.766	1.014	0.0516017	0.91746	89.9	70.2	120.5	119.5	0		0
High	Q9U3Z7	NHP2-like protein 1 homolog	22.115	43	4	33	4	hoip	1.101	1.12	0.294897	0.361069	123.7	107.7	78.1	90.4	0		0
High	Q9VQX4	Nicotinate phosphoribosyltransferase	18.155	12	4	28	4	Naprt	0.73	0.895	0.0741832	0.363855	81.2	58.3	140	120.5	0		0
High	A1Z877	Nidogen	17.094	3	4	35	4	Ndg	1.268	0.897	0.0255949	0.370578	82.8	89.9	119.4	107.9	0		0
High	Q9NK57	NIF3-like protein 1	2.166	4	1	5	1	anon-35F/36A	0.965	0.893	0.918699	0.354483	86.5	83.5	121.5	108.5	0		0
High	Q7PLI2	Nipped-B protein	3.581	1	1	6	1	Nipped-B	1.027	1.006	0.773436	0.964986	89.4	87.3	115.4	108	0		0
High	O76464	Nitrilase and fragile histidine triad fusion protein NitFhit	3.789	2	1	2	1	NitFhit	0.817	0.96	0.349145	0.734755	104	79.7	110.4	105.9	0		0
High	Q7KT91	Non-lysosomal glucosylceramidase	2.35	2	1	1	1		1.389	0.822	0.0660078	0.108816	58.3	81.6	144.7	115.5	0		0
High	Q9VQ62	NPC intracellular cholesterol transporter 2 homolog a	19.21	41	4	37	4	Npc2a	1.041	1.461	0.598421	0.00205108	120.1	124.3	64.2	91.5	0		0
Medium	Q9V3H8	NTF2-related export protein	1.889	10	1	9	1	Nxt1	1.401	1.082	0.01223	0.523806	75.9	104.5	105.4	114.1	0		1	Phospho [T115(100)]
High	Q9VCW3	Nuclear pore complex protein Nup133	7.092	1	1	8	1	Nup133	0.545	1.534	0.00204992	0.000498037	177.7	102.4	48.2	71.7	0		0
High	Q9V463	Nuclear pore complex protein Nup154	13.883	5	4	8	4	Nup154	0.791	1.143	0.0977614	0.278751	161.5	105.1	58.4	75	0		0
High	Q8IQV9	Nuclear pore complex protein Nup205	15.156	3	4	22	4	Nup205	1.228	1.145	0.0390686	0.272821	85.2	127.2	95.1	92.5	0		0
High	Q9GYU8	Nuclear pore complex protein Nup88	12.363	5	2	16	2	mbo	0.678	1.094	0.052773	0.469674	131	92.7	87.9	88.3	0		0
High	Q9VCH5	Nuclear pore complex protein Nup98-Nup96	10.976	2	3	14	2	Nup98-96	1.011	0.985	0.8336	0.899638	95	102.7	102.1	100.3	0		0
High	Q7JXF5	Nuclear pore glycoprotein p62	5.581	4	1	7	1	Nup62	1.096	0.96	0.502438	0.73666	75.6	82.8	122.5	119.1	0		0
High	A1Z6H7	Nuclear pore membrane glycoprotein 210	11.074	1	2	3	2	Gp210	1.141	1.022	0.347812	0.866991	97.3	106.3	98.4	98	0		0
High	Q9VBP9	Nuclear protein localization protein 4 homolog	17.625	5	2	28	2	Npl4	0.767	1.119	0.122363	0.364087	112.6	85.8	98.3	103.3	0		0
High	Q27415	Nucleoplasmin-like protein	23.62	30	5	76	5	Nlp	0.881	0.934	0.304453	0.573978	100.2	89.9	107.6	102.3	0		0
Medium	Q7K2X8	Nucleoporin seh1	1.603	4	1	3	1	Nup44A	0.535	1.246	4.16045e-05	0.0736653	125.4	67.5	92.5	114.6	0		0
High	A1Z8P9	Nucleoprotein TPR	6.181	3	3	10	3	Mtor	1.081	0.979	0.500402	0.856645	94.1	109.6	98.7	97.7	0		0
High	P08879	Nucleoside diphosphate kinase	112.148	46	7	262	7	awd	0.982	0.923	0.983078	0.509813	111.7	114.9	89	84.3	0		0
High	Q9VBV5	Nucleotide exchange factor Sil1	4.341	3	1	2	1	Sil1	1.346	1.409	0.117384	0.00526698	87.9	113.7	82.3	116	0		0
High	Q9VEG9	Nurim homolog	4.035	5	1	4	1	nrm	0.835	1.143	0.425157	0.279855	68.3	57	131.7	143.1	0		0
High	Q8SWU7	Obg-like ATPase 1	37.113	29	6	27	6		0.915	0.928	0.499168	0.536746	84.2	85.8	122.9	107.1	0		0
High	A8DYP0	Obscurin	194.155	13	36	197	36	Unc-89	1.015	1.079	0.776871	0.53788	103	90.4	100.4	106.1	0		0
High	Q9W1X9	OCIA domain-containing protein 1	10.298	14	2	3	2	asrij	1.006	1.053	0.846613	0.678116	77.1	76.4	120	126.5	0		0
High	Q94526	Open rectifier potassium channel protein 1	2.433	1	1	1	1	Ork1	0.01	0.01	1e-17	1e-17	205.8		194.2		0		0
High	P06002	Opsin Rh1	139.653	28	8	500	8	ninaE	1.015	0.835	0.775561	0.140573	97.5	98.4	111	93.1	0		1	Phospho [S362(100)]
High	P04950	Opsin Rh3	18.804	12	3	35	3	Rh3	0.964	0.89	0.848632	0.341371	109.8	101.1	101.2	88	0		0
High	P08255	Opsin Rh4	18.456	10	2	33	2	Rh4	1.018	0.882	0.804621	0.301663	105.9	96.2	102.8	95.1	0		0
Low	O01668	Opsin Rh6	1.5	2	1	2	1	Rh6	1.722	0.507	0.00323648	2.89276e-08	44.2	68.1	191.6	96	0		0
Low	Q24432	Optomotor-blind protein	1.373	1	1	6	1	bi	1.359	0.782	0.00334262	0.0449327	85.8	116.2	110.2	87.8	0		0
High	Q9VW26	Ornithine aminotransferase, mitochondrial	35.372	19	7	49	7	Oat	0.721	0.652	0.00371056	0.000484941	136.2	83.2	110.6	70	0		0
Medium	P20240	Otefin	2.036	3	1	2	1	Ote	1.221	1.424	0.129615	0.00404459	100.1	121.7	73.2	105	0		0
High	Q9V3D2	Oxygen-dependent coproporphyrinogen-III oxidase	8.797	9	3	13	3	Coprox	0.839	0.955	0.188622	0.704022	116.3	94.3	94.8	94.6	0		0
High	Q868Z9	Papilin	106.108	8	18	166	18	Ppn	1.239	1.053	0.0323708	0.680188	72.9	106.2	107.8	113	0		0
High	P35415	Paramyosin, long form	744.024	73	79	1931	50	Prm	1.068	1.21	0.449232	0.122253	89.6	97	96.4	117	0		0
High	P35416	Paramyosin, short form	336.417	50	35	848	6	Prm	1.151	1.266	0.14567	0.0551732	96.4	93.6	93.7	116.3	0		0
High	Q9NB04	Patj homolog	6.326	3	2	14	2	Patj	1.608	0.954	0.000256065	0.694104	51.9	17.5	195.4	135.2	0		0
High	A1ZA47	PDZ and LIM domain protein Zasp	112.313	11	19	156	2	Zasp52	1.394	1.134	0.0051586	0.308843	97.4	100.8	93.7	108	0		0
High	P08761	Peptide methionine sulfoxide reductase	7.401	7	1	3	1	MsrA	1.516	0.867	0.0159204	0.24199	104.9	161.8	69.7	63.6	0		0
High	Q70PY2	Peptidoglycan-recognition protein SB1	28.574	38	6	29	6	PGRP-SB1	1.553	6.669	0.00481427	1e-17	21.8	27.6	37.2	313.5	0		0
High	P48375	Peptidyl-prolyl cis-trans isomerase Fkbp12	67.977	74	6	200	6	Fkbp12	0.997	0.989	0.907436	0.921981	121.4	120.1	80.2	78.3	0		0
High	P25007	Peptidyl-prolyl cis-trans isomerase	127.099	61	15	469	15	Cyp1	0.955	0.934	0.777699	0.573728	105.2	99.7	100.3	94.8	0		0
High	P15425	Peptidyl-prolyl cis-trans isomerase, rhodopsin-specific isozyme	3.658	3	1	24	1	ninaA	0.907	1.089	0.623006	0.493418	74.5	69.4	122.8	133.2	0		0
High	Q24210	Peripheral plasma membrane protein CASK	50.096	14	9	92	9	CASK	1.071	1.17	0.433142	0.202121	77	86.1	114	122.9	0		0
High	Q9V3P0	Peroxiredoxin 1	102.116	60	11	235	11	Jafrac1	0.867	1.043	0.237805	0.734638	103.5	94.7	98.8	103	0		0
High	Q9VXJ0	Peroxisomal multifunctional enzyme type 2	85.023	28	11	82	11	Mfe2	0.815	0.955	0.0791313	0.705752	129.5	96.2	85.3	89	0		0
High	Q9V521	Phenoloxidase 2	151.065	44	23	383	23	PPO2	1.223	0.991	0.0432482	0.934136	106.3	130.1	83.1	80.4	0		0
High	Q9W3J5	Phenylalanine--tRNA ligase alpha subunit	8.959	5	2	11	2	alpha-PheRS	1.175	1.068	0.251922	0.59771	108.8	127.1	81.7	82.4	0		0
High	Q9VCA5	Phenylalanine--tRNA ligase beta subunit	27.576	14	6	29	6	beta-PheRS	0.86	1.063	0.262974	0.622285	101.5	90	88.1	120.3	0		0
High	M9PFN0	Phosphatase Herzog	6.02	11	2	3	2	hzg	0.819	1.012	0.142425	0.925488	133.1	114.9	78.1	74	0		0
High	P56079	Phosphatidate cytidylyltransferase, photoreceptor-specific	59.968	20	8	76	8	Cds	1.214	0.905	0.0510259	0.411802	72.3	91.7	123.3	112.7	0		1	Phospho [S40(100)]
High	Q9W0I6	Phosphatidylinositol-3-phosphatase SAC1	15.724	9	4	20	4	Sac1	1.013	1.002	0.873968	0.989069	77.5	88.9	116.9	116.7	0		0
High	Q9VI75	Phosphatidylinositol-binding clathrin assembly protein LAP	111.669	40	14	144	14	lap	1.05	0.979	0.545378	0.860406	105.9	104	93.4	96.8	0		0
High	P20007	Phosphoenolpyruvate carboxykinase [GTP]	21.971	10	6	34	6	Pepck1	0.966	1.287	0.863262	0.040168	121.2	118.3	68.3	92.2	0		0
High	Q9VUY9	Phosphoglucomutase	197.912	58	21	360	21	Pgm1	0.884	0.853	0.31852	0.191904	127.3	109.9	88.4	74.4	0		1	Phospho [S116(100)]
High	Q01604	Phosphoglycerate kinase	203.412	73	23	509	23	Pgk	0.901	0.955	0.413514	0.70539	100.9	91.8	105.3	102	0		0
High	Q9VTZ6	Phosphomannomutase	14.257	13	3	19	3	Pmm2	1.075	1.1	0.417351	0.441758	94.6	104.9	94.7	105.9	0		0
High	P35421	Phosphoribosylformylglycinamidine synthase	139.298	27	25	144	25	Pfas	0.994	0.969	0.924026	0.794675	129.7	120.8	81.7	67.8	0		0
High	P19107	Phosrestin-1	325.461	71	32	990	32	Arr2	1.07	0.946	0.438425	0.649459	99.1	105.7	100.2	95	0		1	Phospho [S366(100)]
High	P15372	Phosrestin-2	191.906	68	22	463	22	Arr1	0.949	0.719	0.732902	0.00694394	115.2	110.1	102.4	72.4	0		0
High	M9MSG8	Piezo-type mechanosensitive ion channel component	15.313	2	3	12	3	Piezo	1.116	0.902	0.394979	0.395503	112.3	122.4	73.3	92	0		0
High	Q9VXP4	Platelet-activating factor acetylhydrolase IB subunit beta homolog	6.401	11	1	5	1	Paf-AHalpha	0.622	100	0.0212889	1e-17	228.9	141.6		29.4	0		0
High	O76902	Pleckstrin homology domain-containing family F member 1 homolog	17.386	7	1	25	1	rush	2.836	1.155	2.22045e-16	0.24182	51.3	161.4	86.4	100.9	0		0
Medium	Q9VD44	Poly(A) RNA polymerase gld-2 homolog A	1.638	3	1	3	1	Gld2	0.933	2.268	0.811612	2.6084e-11	165.8	142	28.2	64	0		1	Phospho [T401(96)]
Medium	O46043	Poly(ADP-ribose) glycohydrolase	1.546	1	1	1	1	Parg	1.027	0.806	0.782356	0.0785031	80.4	84.1	128.5	107.1	0		0
High	Q9VZ49	Poly(U)-specific endoribonuclease homolog	30.078	11	5	35	5		1.024	0.97	0.708743	0.79744	101.6	103.3	98.1	97	0		0
High	P21187	Polyadenylate-binding protein	106.191	31	16	188	16	pAbp	1.028	0.995	0.687013	0.96379	108.5	115.8	90.6	85.1	0		0
High	Q9V9E3	Presequence protease, mitochondrial	29.912	10	7	27	7		0.822	0.826	0.10208	0.117013	120.5	104.4	94.1	80.9	0		0
High	Q9VM46	Probable 26S proteasome complex subunit sem1	10.964	28	1	10	1	Sem1	1.225	1.162	0.217228	0.223041	99.1	118.3	85.1	97.5	0		0
High	P25161	Probable 26S proteasome non-ATPase regulatory subunit 3	49.118	25	13	87	13	Rpn3	1.144	1.084	0.160099	0.516935	93.1	129.3	76.7	100.9	0		0
High	Q9V6Y3	Probable 28S ribosomal protein S16, mitochondrial	8.963	18	1	3	1	mRpS16	0.784		0.25394		227.1	172.9			0		0
High	Q9VY28	Probable 28S ribosomal protein S25, mitochondrial	3.372	8	1	1	1	mRpS25	1.026	100	0.766613	1e-17	174.8	174.2		50.9	0		0
High	Q9VA02	Probable 2-oxoglutarate dehydrogenase E1 component DHKTD1 homolog, mitochondrial	10.848	7	4	6	4		0.948	0.806	0.72265	0.077048	165.9	148.5	49.7	35.9	0		0
High	Q9V8M5	Probable 3-hydroxyisobutyrate dehydrogenase, mitochondrial	55.963	40	7	60	7		0.63	0.492	3.21868e-05	7.42952e-09	131.3	82.9	110.3	75.5	0		0
High	Q9VXX8	Probable 60S ribosomal protein L37-A	13.971	39	4	49	4	RpL37a	0.958	0.853	0.803498	0.192906	112.1	112	92.6	83.3	0		0
High	Q9VZ64	Probable 6-phosphogluconolactonase	57.038	50	9	157	9		0.799	0.96	0.0527812	0.73497	134	99.7	79.3	87.1	0		0
High	Q9VYH3	Probable alpha-aspartyl dipeptidase	22.084	19	3	37	3		0.83	1.186	0.251746	0.165844	72.8	65.8	87	174.4	0		0
High	Q9VXN4	Probable arginine--tRNA ligase, cytoplasmic	3.086	3	2	2	2	ArgRS	0.709	1.009	0.0547135	0.948309	91.7	57.5	121.8	129	0		0
High	Q9VD51	Probable ATP-dependent RNA helicase pitchoune	2.663	2	1	3	1	pit	1.007	1.383	0.836791	0.00844762	107.4	109.9	76.4	106.3	0		0
High	Q9W401	Probable citrate synthase, mitochondrial	225.682	54	20	969	20	kdn	0.997	1.077	0.902012	0.548361	85.9	86.3	110.1	117.7	0		0
High	Q9VE00	Probable cytochrome P450 12a4, mitochondrial	53.26	19	6	76	5	Cyp12a4	0.923	0.985	0.550653	0.896459	124.4	129.4	72.2	74	0		0
High	Q9VE01	Probable cytochrome P450 12a5, mitochondrial	10.039	5	2	9	1	Cyp12a5	100		1e-17			400			0		0
High	Q9V8M2	Probable cytochrome P450 12b2, mitochondrial	6.997	5	2	10	2	Cyp12b2	0.98	0.82	0.963355	0.104087	126.3	111.5	90.1	72	0		0
High	Q9V419	Probable cytochrome P450 28a5	27.377	10	4	70	4	Cyp28a5	0.872	1.106	0.277447	0.41347	113.9	95.4	91.4	99.3	0		0
High	Q9VMT5	Probable cytochrome P450 28d1	96.506	38	16	162	16	Cyp28d1	0.69	0.667	0.000942872	0.000964929	125.4	95.6	103.3	75.7	0		0
High	Q9VW43	Probable cytochrome P450 305a1	9.518	6	2	14	2	Cyp305a1	0.832	0.896	0.232974	0.369677	125.4	86.4	101.6	86.6	0		0
High	Q9VFJ0	Probable cytochrome P450 313a1	3.913	3	1	2	1	Cyp313a1		1.418		0.00453796			165.2	234.8	0		0
High	Q9W011	Probable cytochrome P450 4d20	4.152	5	2	5	2	Cyp4d20	0.976	0.736	0.988587	0.0124136	109.4	110.7	105.1	74.8	0		0
High	Q9V4U9	Probable cytochrome P450 6a13	17.432	6	2	19	2	Cyp6a13	0.77	0.802	0.170447	0.0718494	124.6	100.7	117.1	57.6	0		0
High	Q9V770	Probable cytochrome P450 6a17	4.412	6	2	7	1	Cyp6a17	0.808	1.848	0.354044	5.86953e-07	170.9	107.5	45.1	76.4	0		0
High	Q9V773	Probable cytochrome P450 6a20	7.202	4	2	9	1	Cyp6a20	0.621	0.577	0.0223127	7.15443e-06	145.5	90.3	104.1	60.1	0		0
High	Q9V771	Probable cytochrome P450 6a23	25.972	8	3	35	2	Cyp6a23	0.758	0.935	0.0150006	0.577532	148.4	109.3	78.5	63.8	0		0
High	Q9VFP1	Probable cytochrome P450 6d5	49.133	22	10	94	10	Cyp6d5	0.558	0.556	1.2777e-07	1.67143e-06	153.1	89.6	106.3	50.9	0		0
High	Q9VG82	Probable cytochrome P450 9f2	40.329	14	6	52	6	Cyp9f2	0.867	0.865	0.239464	0.235568	136.8	120.1	76.7	66.4	0		0
High	Q7K1Y4	Probable cytosolic iron-sulfur protein assembly protein Ciao1	4.234	4	1	2	1	Ciao1	0.992	0.91	0.911084	0.439273	93.7	100.9	107.3	98	0		0
Low	Q9VUM0	Probable DNA mismatch repair protein Msh6	1.49	1	1	15	1	Msh6	0.966	1.125	0.89799	0.339446	93.7	91.5	100.4	114.4	0		0
Medium	Q9VR91	Probable E3 ubiquitin-protein ligase HERC2	1.795	0	1	15	1	HERC2	0.893	0.849	0.51718	0.18008	90.7	79.8	124.2	105.3	0		0
High	O96827	Probable elongation factor 1-beta	77.502	42	8	187	8	eEF1beta	0.949	0.896	0.735422	0.367752	118.9	115.7	86.8	78.6	0		0
High	Q9VL18	Probable elongation factor 1-delta	63.592	37	8	126	8	eEF1delta	0.96	0.866	0.815154	0.239556	101.5	93.6	108.9	96	0		0
High	Q9VMA2	Probable galactose-1-phosphate uridylyltransferase	30.514	15	6	93	6	Galt	0.953	0.976	0.767461	0.837631	133.5	144.4	62.2	59.9	0		0
High	Q9W1X8	Probable GDP-L-fucose synthase	3.5	11	2	3	2	Gmer	0.496	0.512	2.12601e-08	4.79291e-08	148.3	68.4	122.1	61.1	0		0
High	Q9VAI0	Probable glucosamine 6-phosphate N-acetyltransferase	7.032	8	1	11	1	Gnpnat	0.72	0.864	0.119691	0.231986	167.6	119.7	63.4	49.2	0		0
High	Q9Y105	Probable glutamine--tRNA ligase	3.742	2	2	2	2	GlnRS	0.724	1.026	0.0738198	0.841463	154.6	122.4	59.2	63.8	0		0
High	Q9VKA4	Probable G-protein coupled receptor CG31760	6.941	1	1	2	1		1.298	1.167	0.149219	0.21044	68.5	87.2	110	134.4	0		0
High	Q7KVQ0	Probable H/ACA ribonucleoprotein complex subunit 1	6.183	8	1	7	1		0.726	1.33	0.0846765	0.0203792	150.3	116.3	62.8	70.7	0		0
High	Q9W265	Probable hydroxyacid-oxoacid transhydrogenase, mitochondrial	3.889	3	1	1	1	T3dh									0		0
High	Q9VT51	Probable insulin-like peptide 2	9.384	15	1	44	1	Ilp2	0.665	1.187	0.0207102	0.163817	175.5	111.2	53.5	59.8	0		0
High	Q9VWH4	Probable isocitrate dehydrogenase [NAD] subunit alpha, mitochondrial	169.379	53	19	609	19	Idh3a	0.929	1.034	0.593278	0.792787	97.7	90.4	104.7	107.2	0		0
High	Q9VHD3	Probable maleylacetoacetate isomerase 1	5.124	5	1	2	1	GstZ1	0.432	0.01	4.50956e-06	1e-17	144.4	62.4	193.2		0		0
High	Q9VHD2	Probable maleylacetoacetate isomerase 2	10.122	11	2	30	2	GstZ2	0.749	0.918	0.0977626	0.479714	110.2	90.3	102.6	96.9	0		0
High	Q9VSA3	Probable medium-chain specific acyl-CoA dehydrogenase, mitochondrial	146.458	45	18	487	18	Mcad	0.975	0.898	0.928588	0.378063	93.1	90.7	115.5	100.7	0		0
High	Q9V9A7	Probable methylcrotonoyl-CoA carboxylase beta chain, mitochondrial	5.972	3	1	8	1	Mccc2	0.934	1.048	0.806434	0.705406	108.3	100.9	93.1	97.6	0		0
High	Q7KW39	Probable methylmalonate-semialdehyde dehydrogenase [acylating], mitochondrial	117.491	37	13	263	13		0.925	0.832	0.562123	0.132997	99.7	102	103.1	95.2	0		0
High	Q9VY93	Probable methylthioribulose-1-phosphate dehydratase	7.638	7	1	8	1		1.055	1.104	0.652727	0.422708	85	88.4	109.3	117.3	0		0
High	Q9NHD5	Probable N-acetyltransferase san	9.878	17	2	17	2	san	1.114	0.901	0.424966	0.393964	106.4	121.1	91.9	80.6	0		0
High	Q9VCI0	Probable oligoribonuclease	7.501	9	1	18	1		0.624	1.303	0.025355	0.0316625	133.7	83.5	79	103.8	0		0
High	Q7KML2	Probable peroxisomal acyl-coenzyme A oxidase 1	44.814	13	5	46	5		0.802	1.178	0.0941434	0.184899	92.3	96.4	101.9	109.4	0		0
High	Q9W391	Probable phosphorylase b kinase regulatory subunit alpha	10.514	5	2	8	2		0.547	100	0.00130042	1e-17	286.6	73.1		40.3	0		0
High	Q9VAN0	Probable phosphoserine aminotransferase	70.993	37	11	126	11		1.001	1.424	0.875264	0.00408217	101.1	98.4	88.2	112.3	0		0
High	Q9VCZ8	Probable prefoldin subunit 5	2.735	7	1	4	1	Pfdn5	0.962	1.088	0.968312	0.497826	126.3	122.1	71.2	80.4	0		0
High	Q9VW56	Probable prefoldin subunit 6	5.052	9	1	18	1	Pfdn6	1.045	0.948	0.679647	0.661099	103.8	107.8	96.1	92.3	0		0
High	Q7K4Q5	Probable protein phosphatase CG10417	16.452	4	2	29	2		0.935	1.04	0.804433	0.755814	129.9	124.5	71.7	73.9	0		0
High	Q94529	Probable pseudouridine-5'-phosphatase	10.753	14	2	22	2	Gs1l	0.416	0.966	1.08802e-14	0.771137	197.5	80.6	60.9	61	0		0
Low	Q9VLV5	Probable small nuclear ribonucleoprotein E	1.435	16	1	1	1	SmE	1.201	1.24	0.216315	0.0804906	113.9	133.8	63.3	89	0		0
High	Q9VU02	Probable small nuclear ribonucleoprotein Sm D1	6.237	16	1	32	1	SmD1	0.922	2.43	0.784262	4.91607e-13	152.2	142.4	31.1	74.3	0		0
High	Q9VI10	Probable small nuclear ribonucleoprotein Sm D2	2.734	8	1	3	1	SmD2	1.136	1.331	0.339353	0.0200199	101.1	116.8	77.5	104.6	0		0
High	Q9VN12	Probable sodium/potassium/calcium exchanger CG1090	37.871	10	5	82	5		1.096	0.936	0.317327	0.583496	52.2	77.6	146.4	123.8	0		0
High	Q9W1G0	Probable transaldolase	99.369	49	14	215	14	Taldo	0.812	0.751	0.0734952	0.0191313	126.7	101.5	98.7	73.2	0		0
High	Q26377	Pro-corazonin	3.907	12	2	3	2	Crz	0.949	0.992	0.893235	0.940517	21.6	20.8	180.4	177.2	0		0
High	P25843	Profilin	84.334	68	6	139	6	chic	0.867	0.963	0.238268	0.752484	103.6	100.4	98.8	97.2	0		0
High	Q7K2G1	Proteasomal ubiquitin receptor ADRM1 homolog	74.053	40	8	63	8	Rpn13	1.034	0.952	0.648034	0.685447	112.1	110.6	90	87.3	0		0
High	P12881	Proteasome subunit alpha type-1	65.942	48	10	96	10	Prosalpha6	0.971	1.046	0.896423	0.721435	94.4	106.3	86.3	112.9	0		0
High	P40301	Proteasome subunit alpha type-2	32.427	27	5	40	5	Prosalpha2	0.706	1.125	0.00275571	0.341025	67.7	66.4	128.5	137.5	0		0
High	Q9V5C6	Proteasome subunit alpha type-3	62.178	57	10	92	10	Prosalpha7	0.876	1.019	0.278163	0.885555	120	97.7	92.9	89.3	0		1	Phospho [S248(100)]
High	P18053	Proteasome subunit alpha type-4	32.162	30	7	87	7	Prosalpha3	1.033	1.029	0.653391	0.821698	108.4	116.5	84.6	90.5	0		0
High	Q95083	Proteasome subunit alpha type-5	19.19	20	4	39	4	Prosalpha5	0.945	1.078	0.703641	0.545324	123.4	111.5	80.7	84.4	0		0
High	Q9XZJ4	Proteasome subunit alpha type-6	45.042	38	9	126	9	Prosalpha1	0.983	1.039	0.994854	0.758612	95.2	92.8	103.8	108.2	0		0
High	P22769	Proteasome subunit alpha type-7-1	60.029	44	8	97	8	Prosalpha4	0.944	1.028	0.701585	0.82913	112.3	103	90.4	94.3	0		0
High	P40304	Proteasome subunit beta type-1	41.301	35	5	49	5	Prosbeta6	0.787	1.11	0.037503	0.398872	139.2	105.6	74.6	80.7	0		0
High	Q9XYN7	Proteasome subunit beta type-3	15.895	14	2	19	2	Prosbeta3	1.029	1.172	0.769005	0.198842	134.6	126	64.2	75.2	0		0
High	Q9VNA5	Proteasome subunit beta type-4	22.717	17	4	68	4	Prosbeta7	0.952	1.096	0.755339	0.458407	88.7	55.8	120.5	135.1	0		0
High	Q9V8R9	Protein 4.1 homolog	326.92	33	39	520	39	cora	1.056	1.055	0.514566	0.668218	89.6	104.2	99.7	106.4	0		0
High	C0HK95	Protein anoxia up-regulated	34.011	63	6	59	5	fau	1.466	1.466	0.00020766	0.00188407	100.1	123.8	83.6	92.5	0		0
High	Q9VUQ5	Protein argonaute-2	4.828	2	1	1	1	AGO2		100		1e-17				400	0		0
Low	Q9VEX5	Protein asunder	1.492	1	1	8	1	Asun	1.229	0.944	0.0384581	0.63364	91.7	111.1	101.8	95.4	0		0
High	P29746	Protein bangles and beads	337.899	69	28	929	28	bnb	1.097	1.051	0.313658	0.688061	87.6	96.5	106.6	109.3	0		1	Phospho [S192(100)]
Low	P16568	Protein bicaudal D	1.492	2	1	2	1	BicD	1.064	0.906	0.557054	0.418039	80.6	95.3	117.5	106.7	0		0
High	Q9U4G1	Protein borderless	133.016	36	16	308	16	bdl	0.9	1.143	0.404088	0.279378	112.6	93.3	95.1	99	0		0
High	P22815	Protein bride of sevenless	37.383	11	8	45	8	boss	1.033	0.856	0.654883	0.203665	85.3	89.4	122.7	102.6	0		1	Phospho [S875(100)]
High	Q8MMC4	Protein CDV3 homolog	23.856	21	4	50	4		1.047	0.983	0.566737	0.886533	129.4	131.9	69.6	69.1	0		0
High	A1ZAB5	Protein clueless	3.623	1	1	4	1	clu	0.673	0.812	0.0567509	0.0884671	130.4	87	101.4	81.3	0		0
High	P10040	Protein crumbs	15.705	2	4	19	4	crb	1.159	1.17	0.22792	0.203435	118.3	127.6	73.9	80.1	0		0
High	P98081	Protein disabled	4.288	1	1	3	1	Dab	1.571		0.00900624		155.6	244.4			0		0
High	Q9V438	Protein disulfide-isomerase A6 homolog	17.817	13	5	16	5	CaBP1	0.823	0.628	0.10445	0.000145558	118.8	87.4	125.9	67.9	0		0
High	P54399	Protein disulfide-isomerase	302.024	75	33	703	33	Pdi	0.842	0.843	0.145554	0.163404	98.6	89	114.9	97.6	0		0
High	Q9VA37	Protein dj-1beta	46.342	42	6	80	6	dj-1beta	1.16	1.098	0.125595	0.44969	69.2	87.2	113.2	130.4	0		0
High	Q9VKQ9	Protein dpy-30 homolog	9.583	12	1	32	1	Dpy-30L1	0.7	0.971	0.0758188	0.806325	123.4	85.6	96.2	94.9	0		0
Medium	Q9W0A0	Protein draper	1.766	1	1	2	1	drpr	1.162	0.01	0.361076	1e-17	94.4	109.2	196.4		0		0
High	Q8IGJ0	Protein EFR3 homolog cmp44E	5.933	2	2	16	2	stmA	1.086	1.011	0.500082	0.935749	100.3	106.3	96.7	96.7	0		0
High	P16914	Protein elav	21.599	13	4	66	4	elav	0.946	1.044	0.728829	0.727871	114.1	115.1	83.3	87.5	0		0
High	A0A1F4	Protein eyes shut	75.513	7	12	186	12	eys	1.174	1.202	0.100242	0.136175	117	124	70	88.9	0		0
High	Q9XZ14	Protein gone early	21.63	8	4	15	4	goe	0.852	0.929	0.324596	0.543471	108.3	55.3	118.6	117.8	0		0
High	P17276	Protein henna	130.823	50	17	247	17	Hn	0.874	1.043	0.270511	0.738422	131.4	117.1	74.6	76.8	0		0
High	Q9VG55	Protein hugin	12.564	9	1	12	1	Hug	0.738	0.675	0.109426	0.00130737	144.7	91.5	98.9	64.8	0		0
High	Q9VVT2	Protein I'm not dead yet	16.518	7	4	22	4	Indy	0.91	1.011	0.601776	0.932074	54.4	70.6	139.3	135.7	0		0
High	P13678	Protein kinase C	17.368	9	5	11	5	Pkc98E	1.136	1.053	0.182766	0.679764	93	113.6	92.5	101	0		0
High	P13677	Protein kinase C, eye isozyme	120.338	30	21	328	17	inaC	1.037	0.962	0.627255	0.749618	96.7	97.8	104.3	101.2	0		1	Phospho [T671(100)]
High	P18431	Protein kinase shaggy	79.363	27	11	136	11	sgg	1.086	0.994	0.358637	0.956073	95.8	103.2	100.4	100.6	0		0
High	Q9VNE2	Protein krasavietz	27.063	17	6	33	6	kra	0.934	0.975	0.625755	0.831901	127.1	117.2	80.2	75.5	0		0
High	P24156	Protein l(2)37Cc	131.472	83	17	322	17	l(2)37Cc	0.896	1.065	0.382107	0.61305	100.5	92.7	103.1	103.6	0		0
High	P82147	Protein lethal(2)essential for life	36.434	37	6	38	6	l(2)efl	0.848	0.837	0.18417	0.145111	90.5	65.8	139.6	104.1	0		0
Medium	A1Z9E2	Protein lin-54 homolog	1.734	1	1	3	1	mip120									0		0
High	Q9V4Z9	Protein lines	3.122	1	1	27	1	lin	1.135	1.371	0.185492	0.0103145	105.9	119.1	73.8	101.2	0		0
High	Q86S05	Protein lingerer	22.761	4	3	15	3	lig	1.23	1.085	0.0886994	0.510439	97.2	115.8	93	94	0		0
High	P91891	Protein Mo25	51.52	30	10	74	10	Mo25	1.012	0.935	0.796746	0.578255	91.2	94.5	112.8	101.5	0		0
High	Q9VXK0	Protein NipSnap	30.816	28	7	58	7	Nipsnap	0.89	0.907	0.347366	0.423971	136.8	78.1	90.9	94.2	0		0
High	Q04047	Protein no-on-transient A	40.289	15	7	42	7	nonA	1.136	1.114	0.23002	0.384314	93	109.7	92.7	104.6	0		0
High	Q9VTX8	Protein odr-4 homolog	3.355	3	1	2	1										0		0
High	Q9W0C7	Protein	6.324	6	1	21	1		1.123	1.279	0.449166	0.0455476	66.8	74.2	113.3	145.8	0		0
High	P36872	Protein phosphatase PP2A 55 kDa regulatory subunit OPI10 homolog	9.635	5	2	24	2	tws	0.854	1.152	0.29717	0.251305	117.5	102.1	90.6	89.8	0		0
High	Q9W3E2	Protein PIP82	53.161	11	9	60	9	PIP82	1.109	0.996	0.267139	0.970574	89.8	107.9	101.5	100.7	0		0
High	A1Z9A8	Protein PTCD3 homolog, mitochondrial	14.859	4	2	18	2		0.91	0.85	0.46587	0.182702	188.5	192.3	10.4	8.9	0		0
High	Q9VLT5	Protein purity of essence	14.578	1	4	61	4	poe	0.802	0.96	0.0572134	0.734872	111.5	79.9	104.6	104	0		0
High	Q9VMU5	Protein quick-to-court	3.932	3	1	2	1	qtc	1.056	1.258	0.67413	0.0625838	148	139	48.4	64.6	0		0
High	Q9W2E7	Protein Rae1	4.808	3	1	8	1	Rae1	1.137	1.054	0.178138	0.671351	142.1	160.2	47.6	50.1	0		0
High	P14199	Protein ref(2)P	13.958	5	2	5	2	ref(2)P	1.839	3.014	0.000764357	1e-17	22	40.2	90.1	247.7	0		0
High	P43125	Protein retinal degeneration B	53.348	9	9	101	9	rdgB	0.856	0.987	0.19292	0.912255	106.3	87.3	104.9	101.4	0		0
High	Q9VVE2	Protein rogdi	6.2	7	1	14	1	rogdi	0.815	1.599	0.368559	0.000133521	117	95.8	80.9	106.3	0		0
High	Q07327	Protein ROP	175.245	42	19	438	19	Rop	1.03	1.041	0.668764	0.747967	102.4	93.3	96.1	108.1	0		0
High	Q9V3J4	Protein SEC13 homolog	18.782	10	3	46	3	Sec13	0.962	1.022	0.84054	0.866295	110.7	110.7	87.6	91	0		0
High	Q7JXF7	Protein seele	5.196	6	1	15	1	sel	1.228	0.918	0.136409	0.479565	61.3	81.7	134	123	0		0
High	Q24524	Protein singed	47.004	21	8	55	8	sn	0.894	0.852	0.369052	0.188321	109.2	103.3	102	85.5	0		0
High	Q24179	Protein sly1 homolog	7.607	5	2	10	2	Slh	0.855	1.193	0.47243	0.151475	127.1	101.8	79.9	91.2	0		0
Medium	P26675	Protein son of sevenless	1.843	1	1	3	1	Sos	0.762	4.696	0.179198	1e-17	229.7	152.1	3.2	15	0		1	Phospho [S366(98.5)]
High	Q9GQQ0	Protein spinster	12.709	4	2	15	2	spin	0.913	1.306	0.612141	0.0299402	97.2	89.8	90.1	122.9	0		0
High	P91621	Protein still life, isoform SIF type 1	42.218	4	7	42	7	sif	1.137	1.068	0.215054	0.594391	81.6	96.9	97.7	123.7	0		0
High	Q24211	Protein stoned-A	48.345	17	8	55	8	stnA	0.921	1.078	0.539774	0.542662	106	79.6	107.7	106.7	0		0
High	Q24212	Protein stoned-B	159.522	27	19	301	19	stnB	0.984	1.071	0.999948	0.581734	90.5	98.7	107.6	103.3	0		0
Medium	Q9W2E1	Protein stum	1.704	0	1	14	1	stum	0.995	0.788	0.951457	0.0512935	86	85.1	128	100.9	0		0
High	Q9VXN2	Protein stunted	9.917	25	1	40	1	sun	0.882	1.057	0.305518	0.657742	125.8	105.9	81.4	86.9	0		0
Medium	E1JH25	Protein telomere ends associated	1.699	1	1	2	1	tea									0		0
High	Q27237	Protein tumorous imaginal discs, mitochondrial	3.232	4	1	1	1	l(2)tid	1.062	0.994	0.64027	0.954849	131.2	117.3	70.8	80.7	0		0
High	Q8IN44	Protein Turandot A	42.977	48	5	68	5	TotA	2.127	0.218	8.38662e-13	1e-17	11.4	28.5	296.3	63.9	0		0
High	Q8IN43	Protein Turandot C	65.018	58	7	111	7	TotC	1.782	0.195	3.26323e-08	1e-17	20.9	41.2	284.2	53.7	0		0
Medium	Q967D7	Protein turtle	1.954	1	1	2	1	tutl	1.117	1.141	0.479862	0.284238	56.9	61.2	130.7	151.2	0		0
High	Q9W5A5	Protein tweety-2	4.075	2	1	8	1		0.704	0.845	0.0850356	0.168068	92.1	66.6	130.4	110.9	0		0
High	Q9VBY8	Protein unc-13 homolog 4B	4.306	1	1	6	1	stac	1.201	1.318	0.265437	0.0247209	74.3	89.5	106	130.2	0		0
Medium	Q9VB11	Protein unc-80 homolog	1.794	0	1	13	1	unc80	0.822	1.116	0.167567	0.372972	67.2	54.2	133.1	145.5	0		0
High	P10379	Protein unzipped	27.783	18	6	25	6	uzip	0.896	0.958	0.384018	0.720965	94.1	87.7	115.6	102.6	0		0
High	Q9NHV9	Protein vav	2.673	2	1	1	1	Vav	0.971		0.996271		201.9	198.1			0		0
High	P10090	Protein white	4.917	1	1	9	1	w	1.123	1.228	0.443832	0.0958442	83.1	92.5	102.9	121.4	0		0
High	Q9W266	Protein windpipe	7.78	3	2	11	2	wdp	0.743	0.884	0.0479242	0.312556	113.3	87.4	105.3	94	0		0
High	B7Z0W9	Proton channel OtopLc	12.199	2	2	13	2	OtopLc	2.382	1.069	1.71741e-06	0.589464	13.1	144.1	158.1	84.7	0		0
High	Q9VT04	Proton-coupled amino acid transporter-like protein pathetic	7.265	4	1	4	1	path	0.963	1.195	0.884471	0.149191	125.6	124.7	69.7	80.1	0		0
High	Q7JUY7	PTB domain-containing adapter protein ced-6	16.96	7	3	19	3	ced-6	1.109	1.049	0.362908	0.700983	107.1	129.3	82.2	81.4	0		0
High	O76454	Pterin-4-alpha-carbinolamine dehydratase	33.352	27	3	50	3	Pcd	0.911	0.757	0.469386	0.0226896	125.6	114.2	92.1	68.2	0		0
High	P27779	Pupal cuticle protein Edg-78E	4.01	7	1	19	1	Edg78E	2.113	2.192	1.00215e-08	1.65944e-10	60.6	127.6	65.5	146.3	0		0
High	Q9W141	Putative ATP synthase subunit f, mitochondrial	36.836	50	6	213	6	ATPsynF	0.943	1.028	0.692735	0.828626	97.4	92.2	104.2	106.1	0		0
High	Q9VN93	Putative cysteine proteinase CG12163	41.669	14	7	65	7		1.029	1.318	0.676546	0.0250057	89.1	92	94.5	124.4	0		0
High	P83102	Putative dual specificity tyrosine-phosphorylation-regulated kinase 3 homolog	2.425	1	1	42	1	Dyrk3	1.043	1.068	0.591969	0.595169	78.1	75.6	117.9	128.4	0		0
High	Q9VGK7	Putative elongator complex protein 1	6.328	2	1	1	1	Elp1									0		0
High	A1ZAI5	Putative fatty acyl-CoA reductase CG5065	18.47	6	3	34	3		0.762	1.093	0.0250855	0.47389	104.9	74.9	106.1	114.2	0		0
High	Q960W6	Putative fatty acyl-CoA reductase CG8306	20.095	14	5	19	5		1.013	0.909	0.864607	0.433516	99.7	79.2	115.6	105.5	0		0
High	Q8MSU3	Putative ferric-chelate reductase 1 homolog	11.304	4	2	7	2		1.056	0.89	0.509342	0.339694	57.7	63.2	148.9	130.2	0		0
Medium	Q8INM9	Putative gustatory receptor 85a	1.749	2	1	24	1	Gr85a	0.861	0.843	0.267381	0.160731	101.7	74.1	122.5	101.7	0		0
High	P36951	Putative hydroxypyruvate isomerase	104.812	69	13	253	13	Gip	0.873	0.829	0.264718	0.125221	128.5	110.8	88.6	72.2	0		0
Low	Q9VJB6	Putative neural-cadherin 2	1.456	0	1	1	1	CadN2	0.746	0.929	0.0522101	0.542894	157.7	102.5	72.5	67.4	0		0
High	Q9VCG3	Putative OPA3-like protein CG13603	9.777	9	2	4	2		0.814	1.075	0.342989	0.557598	118	95.2	88.4	98.5	0		0
High	Q8T079	Putative oxidoreductase GLYR1 homolog	48.875	24	11	81	11	Ndf	1.08	1.038	0.385977	0.768321	99.7	107.2	89.3	103.8	0		0
High	P54353	Putative peptidyl-prolyl cis-trans isomerase dodo	10.641	23	3	6	3	dod	1.142	0.946	0.165121	0.648947	111.3	119.5	86.2	83	0		0
High	O76206	Putative riboflavin kinase	18.569	28	3	59	3	anon-84Ea	0.841	0.937	0.162534	0.593692	121.9	107.7	88	82.5	1	Acetyl [N-Term]	0
High	P83097	Putative tyrosine-protein kinase Wsck	3.599	1	1	3	1	Wsck	0.953	1.041	0.82317	0.747276	73.5	71.8	125.2	129.5	0		0
High	Q9VUV9	Putative U5 small nuclear ribonucleoprotein 200 kDa helicase	9.302	2	2	8	2	Brr2	0.924	1.371	0.823427	0.0102601	34.4	20.5	153.3	191.8	0		0
High	Q9VSL3	Pyrimidodiazepine synthase	58.373	54	10	153	10	se	0.793	0.666	0.0443394	0.000923612	143.7	117.3	80.9	58.1	0		0
Medium	Q8INB9	RAC serine/threonine-protein kinase	1.901	1	1	4	1	Akt1	0.775	0.905	0.247892	0.412467	76.9	57.1	141.5	124.5	0		0
High	Q9VIW3	Ran GTPase-activating protein	13.866	5	2	37	2	RanGAP	0.78	1.064	0.142943	0.618493	121	89.1	90.5	99.3	0		0
High	Q4Z8K6	Ran-binding proteins 9/10 homolog	7.634	2	1	5	1	RanBPM	0.697		0.0526259		236.6	163.4			0		0
High	P48148	Ras-like GTP-binding protein Rho1	67.542	63	11	164	11	Rho1	1.014	1.013	0.779169	0.919906	89.2	89.2	111.6	110	0		0
High	Q24192	Ras-like GTP-binding protein RhoL	5.439	6	1	9	1	RhoL	1.038	1.007	0.701821	0.959026	76.9	86.5	116.4	120.2	0		0
High	P08646	Ras-like protein 1	27.104	31	4	44	4	Ras85D	1.071	1.078	0.430361	0.546625	94.4	103.3	95.1	107.2	0		0
High	P04388	Ras-like protein 2	25.272	14	2	18	2	Ras64B	1.056	1.108	0.637491	0.408482	86.6	85.6	112.4	115.3	0		0
High	P25228	Ras-related protein Rab-3	67.451	53	10	166	9	Rab3	1.142	1.071	0.166928	0.579907	80.7	90.6	110.1	118.6	0		0
High	O18334	Ras-related protein Rab6	10.737	11	2	20	1	Rab6	0.99	1.102	0.967545	0.434091	84.7	87.6	109.2	118.4	0		0
High	P40792	Ras-related protein Rac1	21.514	28	5	57	2	Rac1	1.014	1.023	0.781538	0.860693	93.6	96.4	104.6	105.4	0		0
High	P48554	Ras-related protein Rac2	15.681	18	4	48	1	Rac2	1.219	1.16	0.194264	0.229126	84	104.7	98.9	112.4	0		0
High	P48555	Ras-related protein Ral-a	7.911	11	2	5	2	Rala	1.062	1.085	0.636157	0.509445	64.1	70.1	126.7	139.2	0		0
High	P08645	Ras-related protein Rap1	26.435	30	5	69	5	Rap1	1.003	1.041	0.859127	0.748616	98.9	97	101.7	102.4	0		0
High	P25171	Regulator of chromosome condensation	9.807	5	3	6	3	Rcc1	0.899	1.098	0.478424	0.449685	141.2	129.2	60.1	69.4	0		0
High	Q9VJE5	Restin homolog	47.288	7	9	73	9	CLIP-190	1.089	1.128	0.344837	0.327919	92.6	88.8	106.2	112.4	0		0
High	Q9VV36	Retinin	115.652	46	8	398	8	retinin	0.885	0.849	0.323304	0.179251	128.8	100.1	94.4	76.7	0		0
High	Q9V9S7	Rho GTPase-activating protein 100F	2.162	1	1	2	1	RhoGAP100F	0.91	1.169	0.487005	0.205878	86.5	78.7	108.3	126.5	0		0
High	Q9VX32	Rho GTPase-activating protein 190	6.557	2	3	3	3	RhoGAPp190	0.814	1.062	0.294088	0.62653	106.4	116.1	76.4	101.1	0		0
High	Q9VTU3	Rho GTPase-activating protein 68F	2.611	5	1	1	1	RhoGAP68F	0.995	0.958	0.887977	0.718879	150.7	146.2	52.7	50.3	0		0
High	Q94915	Rhythmically expressed gene 2 protein	25.497	27	4	26	4	Reg-2	0.931	1.207	0.621617	0.12695	186.4	126.5	32.1	55	0		0
High	O76878	RILP-like protein homolog	8.671	3	1	10	1	Rilpl	0.902	1.182	0.713561	0.17543	91.2	81.7	103.8	123.4	0		0
High	Q9VLR5	RNA polymerase II transcriptional coactivator	7.083	18	2	11	2	Ssb-c31a	2.245	0.922	6.70245e-09	0.50584	20.3	114.7	136.4	128.6	0		0
High	Q9V535	RNA-binding protein 8A	3.301	9	1	3	1	tsu	0.8	1.084	0.307381	0.516041	150.2	118.7	66.5	64.6	0		0
High	Q27294	RNA-binding protein cabeza	4.333	5	1	4	1	caz	1.367		0.0868189		172.7	227.3			0		0
Medium	Q9BJZ5	RNA-binding protein fusilli	1.828	1	1	4	1	fus	1.222	0.815	0.182494	0.095162	142.2	176.3	44.9	36.6	0		0
High	Q94901	RNA-binding protein lark	6.187	8	2	3	2	lark	1.068	0.917	0.572473	0.474906	116.4	121.1	82.5	80	0		0
High	Q9VVE5	RNA-binding protein Musashi homolog Rbp6	11.79	12	3	8	3	Rbp6	0.823	0.751	0.22806	0.01951	79.8	113.6	118	88.7	0		0
High	Q24491	RNA-binding protein Rsf1	2.157	7	1	2	1	Rsf1	0.808	1.119	0.280936	0.362403	142.2	114.8	65.9	77.1	0		0
Medium	Q7KMJ6	RNA-binding protein spenito	1.925	1	1	4	1	nito	1.155	0.512	0.136682	4.60077e-08	135.3	147.2	78.1	39.4	0		0
High	Q9W1V3	rRNA 2'-O=-methyltransferase fibrillarin	39.647	24	7	54	7	Fib	1.157	1.244	0.132662	0.0761006	95.4	109.1	87.8	107.7	0		0
High	Q9V3W0	RutC family protein UK114	50.802	70	7	110	7	UK114	0.678	0.663	0.000530664	0.000795881	150.4	105.6	87	57	0		0
High	Q9VH07	RuvB-like helicase 1	7.487	5	1	4	1	pont	0.725	0.736	0.112025	0.012282	135.9	97.7	95.8	70.5	0		0
High	Q24498	Ryanodine receptor	60.005	4	13	70	13	RyR	0.857	1.222	0.197787	0.103187	148	125.8	55.9	70.3	0		0
High	P40320	S-adenosylmethionine synthase	17.107	13	4	24	4	Sam-S	0.941	0.994	0.678388	0.953609	84.9	78.8	116.7	119.6	0		0
High	P07701	Salivary glue protein Sgs-5	12.18	13	2	5	2	Sgs5	2.843		1.99252e-09		52	348			0		0
High	Q9V784	SAM50-like protein CG7639	2.17	2	1	1	1		1.202	1.204	0.22381	0.131802	77.9	93.6	104	124.5	0		0
Medium	Q9VYB0	Selenoprotein BthD	1.733	4	1	5	1	BthD	2.462	1.17	2.25579e-08	0.203252	63.7	141	89.3	105.9	0		0
High	P54359	Septin-2	6.476	5	1	3	1	Septin2	1.043	100	0.721309	1e-17	180.5	196.6		23	0		0
High	Q9V3Z2	Serine protease 7	16.916	13	3	9	3	Sp7	0.818	1.167	0.217964	0.209639	71.2	58.6	127.3	143	0		0
High	Q9V3N1	Serine protease inhibitor 27A	6.607	5	2	4	2	Spn27A	1.129	0.957	0.356681	0.71794	56.3	52.1	150.9	140.8	0		0
High	Q7YTY6	Serine protease inhibitor 42Dd	7.866	6	2	4	2	Spn42Dd	1.082	0.959	0.517875	0.724962	78	85.5	121.5	115	0		0
High	Q0E8C8	Serine protease inhibitor 77Ba	21.077	10	3	7	3	Spn77Ba	0.836	0.918	0.276924	0.484085	102.1	51.7	129.4	116.8	0		0
High	Q9VFC2	Serine protease inhibitor 88Ea	12.597	7	3	10	3	Spn88Ea	0.814	1.031	0.0769267	0.8101	144.7	92.7	87.7	74.9	0		0
Medium	A1Z7T0	Serine/threonine-protein kinase N	1.958	1	1	2	1	Pkn	0.988	0.01	0.91347	1e-17	122.4	121.1	156.5		0		0
High	Q9VWQ2	Serine/threonine-protein kinase S6KL	2.146	2	1	22	1	S6KL	1.748	0.952	9.03428e-08	0.685985	58.9	106.6	119.9	114.7	0		0
High	Q9VK45	Serine/threonine-protein kinase Tor	3.387	0	1	8	1	Tor	1.218	1.092	0.105452	0.479147	115.1	142.9	69.6	72.4	0		0
High	Q9NBK5	Serine/threonine-protein kinase tricornered	8.396	9	2	3	2	trc	1.036	2.059	0.70326	4.15071e-09	104	106	65.4	124.7	0		0
High	Q27889	Serine/threonine-protein phosphatase 2B catalytic subunit 2	93.678	38	17	208	5	Pp2B-14D	1.17	0.995	0.107259	0.963534	85.7	97.6	103.2	113.5	0		0
High	Q9VXF1	Serine/threonine-protein phosphatase 2B catalytic subunit 3	87.349	41	18	198	6	CanA-14F	1.051	1.003	0.538493	0.986926	104.9	114.9	89.9	90.2	0		0
High	Q9W2U4	Serine/threonine-protein phosphatase 4 regulatory subunit 2	10.622	4	2	15	2	PPP4R2r	1.093	1.097	0.491248	0.456201	111.4	120.5	62.3	105.8	0		0
High	P48461	Serine/threonine-protein phosphatase alpha-1 isoform	91.234	41	11	180	3	Pp1alpha-96A	0.937	0.991	0.646951	0.93626	107.8	102	94.1	96.2	0		0
High	P12982	Serine/threonine-protein phosphatase alpha-2 isoform	84.217	40	10	162	2	Pp1-87B	1.101	1.034	0.297194	0.788532	90.1	98.7	103.8	107.3	0		0
High	P48462	Serine/threonine-protein phosphatase beta isoform	68.009	36	10	125	7	flw	0.973	1.031	0.912112	0.806372	73	103.2	112.2	111.6	0		0
High	O46084	Serine/threonine-protein phosphatase Pgam5, mitochondrial	2.805	6	2	3	2	Pgam5	1.081	0.958	0.526944	0.723066	102.3	112.2	86.9	98.6	0		0
High	P36179	Serine/threonine-protein phosphatase PP2A 65 kDa regulatory subunit	154.443	38	19	416	19	Pp2A-29B	1.012	1.023	0.797895	0.858864	89.8	94.4	107.2	108.6	0		0
High	P23696	Serine/threonine-protein phosphatase PP2A	55.933	33	7	103	7	mts	0.844	1.056	0.153266	0.659744	109.4	88.7	98.3	103.5	0		0
High	P40421	Serine/threonine-protein phosphatase rdgC	40.389	11	7	93	7	rdgC	0.93	0.963	0.599103	0.752559	83.1	78.3	122.9	115.7	0		0
High	P26686	Serine-arginine protein 55	27.87	19	8	109	8	B52	1.108	0.925	0.270962	0.522263	96.1	103.5	104.2	96.3	0		0
Medium	Q9V9K7	Serrate RNA effector molecule homolog	1.821	1	1	1	1	Ars2	1.342	1.064	0.0128465	0.620305	97.1	131.8	84.6	86.6	0		0
High	Q9NFP5	SH3 domain-binding glutamic acid-rich protein homolog	55.873	47	6	104	6	Sh3beta	1.436	0.965	0.000440493	0.765311	79.7	101.6	117	101.7	0		0
High	Q9VIQ0	Short neuropeptide F	9.464	6	1	10	1	sNPF	1.187	1.101	0.204043	0.43481	99.5	116.7	87.2	96.6	0		0
High	Q9VN13	Sideroflexin-1-3	72.96	35	8	173	8	Sfxn1-3	0.934	0.979	0.626934	0.860296	110.9	101.9	95.3	91.9	0		0
High	Q9VVW3	Sideroflexin-2	47.309	34	7	95	7	Sfxn2	0.922	1.04	0.540842	0.752243	80.3	114.1	87.1	118.5	0		0
High	Q9VYY2	Signal peptidase complex subunit 2	27.831	39	7	38	7	Spase25	0.978	0.925	0.950078	0.518953	102.3	88.4	100.5	108.8	0		0
High	Q9VCA9	Signal peptidase complex subunit 3	5.934	10	2	6	2	Spase22-23	1.255	0.959	0.0394052	0.725444	95.2	115.5	96.1	93.2	0		0
High	Q9U5L1	Signal recognition particle receptor subunit alpha homolog	5.007	2	1	3	1	SrpRalpha	0.79	1.248	0.298096	0.0725439	111.7	89.7	87.4	111.1	0		0
High	Q9VSS2	Signal recognition particle subunit SRP68	21.631	7	4	36	4	Srp68	0.964	0.844	0.886724	0.164926	71.5	70.7	138.8	119	0		0
High	Q24151	Signal transducer and transcription activator	14.239	5	3	14	3	Stat92E	0.824	0.715	0.19703	0.00610961	140.9	99.2	85.7	74.2	0		0
High	P54622	Single-stranded DNA-binding protein, mitochondrial	6.586	10	1	1	1	mtSSB	0.812	0.937	0.322105	0.592333	115.4	94.2	97.8	92.6	0		0
High	O44437	Small nuclear ribonucleoprotein Sm D3	9.525	13	2	12	2	SmD3	0.956	0.984	0.7815	0.892627	105.8	122.1	88.7	83.5	0		0
High	Q05856	Small nuclear ribonucleoprotein-associated protein B	5.034	7	1	16	1	SmB	1.326	1.091	0.0445423	0.48005	96.2	127.6	84.3	91.9	0		0
High	Q9V813	S-methyl-5'-thioadenosine phosphorylase	25.826	25	6	29	6	Mtap	1.074	0.886	0.418151	0.319225	98.5	108.2	104.1	89.2	0		0
High	Q9U6A0	Sodium/potassium/calcium exchanger Nckx30C	8.129	3	3	13	3	Nckx30C	1.091	1.084	0.471373	0.513492	108.6	123.4	81.3	86.8	0		0
High	P13607	Sodium/potassium-transporting ATPase subunit alpha	735.273	58	58	2557	2	Atpalpha	1.026	1.044	0.698747	0.727711	96	96.5	100.7	106.8	0		0
High	Q24046	Sodium/potassium-transporting ATPase subunit beta-1	35.95	29	6	72	6	nrv1	0.971	1.098	0.896876	0.449216	95.9	92.7	88	123.4	0		0
High	Q7K4Y6	Sodium-dependent dopamine transporter	2.203	1	1	14	1	DAT	1.059	1.018	0.519103	0.889757	59.5	62.4	138.3	139.8	0		0
High	Q9VCJ8	Spaetzle-processing enzyme	22.62	15	5	25	5	SPE	0.974	0.923	0.895972	0.50955	87.5	58.6	132.5	121.4	0		0
High	P13395	Spectrin alpha chain	1171.45	60	128	2389	128	alpha-Spec	1.029	1.028	0.680837	0.824744	96.5	97.4	102.2	103.9	0		1	Phospho [S1034(99.4)]
High	Q00963	Spectrin beta chain	886.958	53	110	1755	110	beta-Spec	1.058	1.056	0.499271	0.659245	93.7	100.8	98.8	106.7	0		1	Phospho [T2143(100)]
High	Q9V7Y2	Sphingosine-1-phosphate lyase	26.609	14	6	32	6	Sply	0.772	0.872	0.0238991	0.262807	84.5	62.8	151.3	101.3	0		0
High	Q94535	Splicing factor U2af 38 kDa subunit	7.278	5	1	22	1	U2af38	0.924	0.935	0.784275	0.578498	99.9	89.9	108.9	101.3	0		0
High	Q9W0S7	Staphylococcal nuclease domain-containing protein 1	232.641	47	33	503	33	Tudor-SN	0.92	0.813	0.529395	0.0897797	117.6	116.7	91	74.7	0		0
High	P92208	Stress-activated protein kinase JNK	19.359	12	3	19	3	bsk	0.903	0.939	0.483029	0.602036	110.7	87.1	112.1	90.1	0		0
High	P83094	Stromal interaction molecule homolog	4.409	3	1	1	1	Stim									0		0
High	Q94523	Succinate dehydrogenase [ubiquinone] flavoprotein subunit, mitochondrial	307.105	52	25	670	25	SdhA	0.958	1.023	0.798193	0.859272	83.4	80.5	121.2	115	0		0
High	P21914	Succinate dehydrogenase [ubiquinone] iron-sulfur subunit, mitochondrial	85.018	56	15	227	15	SdhB	0.983	1.014	0.989175	0.913527	88.5	90	109.6	111.9	0		0
High	Q9VLU6	Succinate dehydrogenase assembly factor 4, mitochondrial	7.157	23	1	1	1	Sirup									0		0
High	Q94522	Succinate--CoA ligase [ADP/GDP-forming] subunit alpha, mitochondrial	140.378	45	13	428	13	Scsalpha1	0.912	0.943	0.478005	0.625661	103.9	95.2	102.4	98.4	0		0
High	Q9W058	Succinyl-CoA:3-ketoacid-coenzyme A transferase, mitochondrial	33.708	20	5	25	5	SCOT	1.071	1.025	0.545854	0.845657	89.2	77.9	115.8	117.2	0		0
High	P61851	Superoxide dismutase [Cu-Zn]	116.886	92	10	328	10	Sod1	0.944	0.986	0.695216	0.902825	98.7	92.2	105.1	104	0		0
High	Q00637	Superoxide dismutase [Mn], mitochondrial	98.092	54	12	272	12	Sod2	0.96	0.992	0.81428	0.944417	93.4	87.7	109.3	109.6	0		0
Medium	Q9VDS6	Surfeit locus protein 6 homolog	1.517	2	1	2	1	Surf6	1.08	1.122	0.535709	0.353276	94.2	103.4	95.9	106.4	0		0
High	Q24546	Synapsin	179.179	29	21	385	21	Syn	1.055	1.076	0.520087	0.556185	87.9	82.2	110.4	119.5	0		1	Phospho [S533(100)]
High	P18489	Synaptobrevin	18.016	21	3	40	3	Syb	1.077	0.864	0.403245	0.230517	80.9	87.9	123.4	107.9	0		0
High	P36975	Synaptosomal-associated protein 25	55.481	41	8	105	8	Snap25	0.998	0.937	0.894048	0.5902	68.9	73.7	136.1	121.3	0		0
High	P21521	Synaptotagmin 1	154.009	38	19	350	19	Syt1	1.089	1.073	0.348059	0.571418	95.1	99.4	101.7	103.8	0		0
High	Q9W358	Synembryn	3.767	2	1	3	1	ric8a	0.71	1.134	0.115774	0.309662	129.3	88	85.5	97.2	0		0
High	Q24547	Syntaxin-1A	61.562	24	8	183	8	Syx1A	1.092	1.057	0.333727	0.65411	94.9	104	97.7	103.4	0		0
High	Q9VGE8	Tachykinins	4.152	3	1	10	1	Tk	0.985	1.09	0.917682	0.488434	71	74.9	121.7	132.4	0		0
Low	Q9V6G5	Tafazzin homolog	1.371	2	1	2	1	Taz	1.298	1.005	0.0263263	0.971917	79.1	104	108.3	108.6	0		0
High	P12613	T-complex protein 1 subunit alpha	50.426	21	10	63	10	CCT1	1.011	1.102	0.804279	0.433895	94.2	97.6	99.5	108.7	0		0
High	P48605	T-complex protein 1 subunit gamma	59.048	25	12	99	12	CCT3	0.989	1.078	0.966508	0.545233	100.5	105	95.7	98.7	1	Acetyl [N-Term]	0
High	Q9VYV3	Thioredoxin domain-containing protein 5 homolog	43.355	31	11	59	11	prtp	0.97	0.897	0.893519	0.372145	102.6	120.8	94.1	82.4	0		0
High	Q9VNT5	Thioredoxin reductase 2, mitochondrial	9.818	5	2	23	1	Trxr2	1.521	0.843	0.00203335	0.162065	58	85.4	138.5	118.1	0		0
High	Q9V429	Thioredoxin-2	28.934	35	4	81	4	Trx-2	1.01	0.973	0.808195	0.815514	109.8	108.3	91.6	90.3	0		0
High	Q9VMD9	Tiggrin	4.6	1	2	3	2	Tig	0.662	1.118	0.000749885	0.368738	136.8	86.7	92	84.5	0		0
High	Q7KIN0	Toll-like receptor 7	2.095	1	1	4	1	Toll-7	100	0.899	1e-17	0.381999		281.7	62.4	55.9	0		0
High	P21525	Transcription factor kayak, isoforms A/B/F	2.54	3	1	9	1	kay	0.834	1.148	0.198153	0.262611	65.2	56.1	130	148.7	0		0
Low	P49846	Transcription initiation factor TFIID subunit 5	1.432	1	1	5	1	Taf5	1.139	1.082	0.298119	0.526694	95.9	109.6	93.9	100.7	0		0
High	Q27272	Transcription initiation factor TFIID subunit 9	3.033	6	1	6	1	e(y)1	1.178	0.753	0.31195	0.020561	109.3	133.6	89.5	67.7	0		0
High	Q9W0Y6	Transient receptor potential cation channel protein painless	63.519	13	11	91	11	pain	0.893	1.058	0.364188	0.650601	111.4	91	98.8	98.8	0		0
High	P19334	Transient receptor potential protein	215.01	32	32	476	32	trp	0.957	0.877	0.795851	0.281459	102.4	101.2	104.7	91.7	0		0
Medium	P48994	Transient-receptor-potential-like protein	1.694	2	1	4	1	trpl	0.541	0.605	0.00354576	4.17636e-05	227.6	125.5	29.2	17.7	0		0
High	Q7KN62	Transitional endoplasmic reticulum ATPase TER94	280.626	53	34	686	34	TER94	0.892	0.982	0.358903	0.876171	108.2	99	95.3	97.4	0		0
High	Q9VGS2	Translationally-controlled tumor protein homolog	62.633	44	6	111	6	Tctp	0.908	0.881	0.456309	0.300084	115.2	109.1	93	82.7	0		0
High	Q8SXY6	Transmembrane emp24 domain-containing protein bai	14.099	20	4	29	4	bai	1.188	1.038	0.081681	0.769122	102.8	123	79.7	94.4	0		0
High	Q9I7K5	Transmembrane emp24 domain-containing protein eca	5.284	11	2	14	2	eca	1.273	0.996	0.0680578	0.966052	93.2	87.2	108	111.6	0		0
High	Q7YU24	Transmembrane GTPase Marf	13.291	4	3	23	3	Marf	1.006	0.934	0.882639	0.573648	113.9	112.6	95.4	78.1	0		0
High	Q8IQ56	Transmembrane protein 11 homolog, mitochondrial	25.096	30	5	37	5	Pmi	0.946	0.892	0.711366	0.346323	62.6	71.7	142.7	123	0		0
High	Q9W2M2	Trehalase	83.377	31	15	150	15	Treh	1.144	1.149	0.162062	0.260549	92.8	101.7	94.8	110.7	0		0
High	P00967	Trifunctional purine biosynthetic protein adenosine-3	104.306	19	15	117	15	Gart	0.776	0.937	0.0269577	0.591995	128.1	95	89.5	87.4	0		0
High	Q9V6K1	Tripeptidyl-peptidase 2	84.343	17	19	151	19	TppII	0.984	1.047	0.998872	0.712542	91.6	97.9	104.1	106.4	0		0
High	Q4V645	Trissin	4.925	9	1	1	1	Trissin	1.188	1.235	0.299428	0.0861775	89	103.4	96.2	111.4	0		0
High	Q9W415	tRNA (guanine-N(7)-)-methyltransferase non-catalytic subunit wuho	34.559	19	4	28	4	wuho	0.855	1.017	0.262404	0.895028	78.6	69.3	120.7	131.3	0		0
High	P06754	Tropomyosin-1, isoforms 9A/A/B	277.704	67	35	938	18	Tm1	1.08	1.153	0.384977	0.249402	91.4	99.8	96.8	112	0		0
High	P09491	Tropomyosin-2	301.277	64	27	767	1	Tm2	0.765	1.868	0.0894354	3.67536e-07	149.5	113.3	46.9	90.3	0		0
High	P47947	Troponin C, isoform 1	4.971	11	2	21	2	TpnC41C	0.703	1.303	0.015819	0.0314932	21.2	13.8	160.6	204.4	0		0
High	P47949	Troponin C, isoform 3	7.729	12	1	9	1	TpnC73F	0.92	1.627	0.744802	7.48445e-05	69.5	63.4	102.9	164.2	0		0
Low	Q9W0Y1	Troponin C-akin-1 protein	1.4	8	1	2	1	Tina-1	1.572	0.96	0.00379871	0.732332	86	121.2	97.8	94.9	0		0
High	P36188	Troponin I	113.029	37	15	386	6	wupA	1.019	1.106	0.748339	0.414082	83.9	85.5	109.7	120.8	0		0
High	P19351	Troponin T, skeletal muscle	213.372	48	30	832	1	up	1.103	1.369	0.290007	0.0106401	144.3	133.5	48.8	73.4	0		1	Phospho [T332(100)]
High	Q7K556	TRPL translocation defect protein 14	10.649	8	3	12	3	Ttd14	0.893	1.037	0.403494	0.772926	134.5	127.5	67.9	70.1	0		0
High	P06605	Tubulin alpha-3 chain	319.548	66	24	1343	24	alphaTub84D	0.984	1.071	0.998753	0.582999	88.6	85.4	109.4	116.5	0		0
High	Q24560	Tubulin beta-1 chain	415.654	79	25	1484	12	betaTub56D	0.968	1.056	0.873931	0.659409	111.5	105.1	88.8	94.6	0		0
High	P61857	Tubulin beta-2 chain	179.366	45	15	926	2	betaTub85D	0.925	1.027	0.583235	0.835826	112.9	147.8	68.9	70.3	0		0
High	Q9VV43	Tubulin polymerization-promoting protein homolog	57.561	56	8	124	8	ringer	1.04	0.971	0.606467	0.807923	125.1	115.4	81.3	78.2	0		0
High	Q9VFM9	Twinfilin	2.198	2	1	1	1	twf	1.066	1.08	0.590263	0.533014	79.1	84.3	113.7	122.9	0		0
High	P18459	Tyrosine 3-monooxygenase	13.502	8	3	20	3	ple	0.816	1.084	0.080929	0.515865	69.1	61.8	140.9	128.3	0		0
High	Q9W0G1	Tyrosine-protein phosphatase non-receptor type 61F	3.556	2	1	3	1	Ptp61F	1.075	1.061	0.594895	0.633629	97.4	108.6	91.5	102.5	0		0
High	Q9W107	Tyrosine--tRNA ligase, mitochondrial	9.912	6	2	3	2	TyrRS-m	0.961	1.202	0.91733	0.136363	101.4	101.3	87.1	110.2	0		0
High	Q9VMQ5	Ubiquinone biosynthesis monooxygenase COQ6, mitochondrial	7.291	6	2	5	2	Coq6	0.766	0.879	0.20531	0.292439	147.3	30	120.7	102.1	0		0
High	Q8MKN0	Ubiquinone biosynthesis protein COQ9, mitochondrial	12.981	6	2	14	2	Coq9	100	1.026	1e-17	0.838553		43	174.4	182.5	0		0
High	Q9VYQ8	Ubiquitin carboxyl-terminal hydrolase 7	19.067	4	4	23	4	Usp7	0.877	1.048	0.425355	0.706148	83.1	79.5	116.3	121.1	0		0
High	Q9VWN5	Ubiquitin carboxyl-terminal hydrolase MINDY-3 homolog	16.444	7	3	22	3	mindy3	1.03	0.926	0.73631	0.528405	36.9	96.9	138.4	127.8	0		0
High	P35122	Ubiquitin carboxyl-terminal hydrolase	57.536	38	7	73	7	Uch	0.867	0.979	0.236629	0.855359	112.2	108.4	91.5	87.8	0		0
High	Q9VRJ9	Ubiquitin thioesterase OTU1	7.39	6	1	1	1		1.005	1.896	0.862744	1.90907e-07	69	66.3	88.5	176.2	0		0
High	P15357	Ubiquitin-40S ribosomal protein S27a	74.31	54	11	213	1	RpS27A	1.06	1.258	0.490671	0.0622362	88.8	93.1	96.9	121.2	0		0
High	P18101	Ubiquitin-60S ribosomal protein L40	76.359	64	11	225	1	RpL40	0.886	0.976	0.445672	0.837423	120.9	109.5	86.2	83.4	0		0
High	P35128	Ubiquitin-conjugating enzyme E2 N	21.855	41	5	63	5	ben	1.019	1.014	0.746145	0.916465	74.2	94.9	114.5	116.4	0		0
High	P25867	Ubiquitin-conjugating enzyme E2-17 kDa	17.734	29	3	69	3	eff	1.082	1.047	0.378795	0.711792	93.1	100.8	100.7	105.5	0		0
High	Q7K738	Ubiquitin-conjugating enzyme E2-18 kDa	27.536	41	5	38	5	Ubc10	0.947	0.999	0.742074	0.987464	79.2	69.8	127.6	123.5	0		0
High	A8DYH2	Ubiquitin-fold modifier 1	9.205	57	2	18	2	Ufm1	0.765	0.96	0.0569528	0.737717	125	93.3	92.4	89.3	0		0
High	Q9VYY3	Ubiquitin-like modifier-activating enzyme 5	19.916	9	2	31	2	Uba5	0.802	1.087	0.247401	0.500925	71.4	56.1	124.2	148.3	0		0
High	Q9W0P5	UDP-glucose 4-epimerase	89.344	45	14	158	14	Gale	0.872	0.825	0.259655	0.116402	111.6	105	99.1	84.4	0		0
High	Q09332	UDP-glucose:glycoprotein glucosyltransferase	58.992	11	11	69	11	Uggt	0.894	0.946	0.380946	0.645799	103.7	97.7	102.7	95.9	0		0
High	Q9VZI3	Unc-112-related protein	16.17	8	4	26	4	Fit1	1.28	1.019	0.0144253	0.884376	83.3	119	101.7	96.1	0		0
High	Q9Y115	UNC93-like protein	5.327	4	1	2	1		0.01	1.548	1e-17	0.000379304	83.2		124.3	192.5	0		0
High	Q9VH95	Uncharacterized protein CG16817	48.9	42	7	110	7		1.117	0.925	0.239377	0.521671	103.9	122.9	96.8	76.3	0		1	Phospho [S116(100)]
Medium	Q9W5D0	Uncharacterized protein CG43867	1.908	0	1	5	1		0.677	1.312	0.000810474	0.0275069	158.2	108.8	57.5	75.5	0		0
High	C0HK92	Uncharacterized protein CG45076	137.312	36	19	346	12		0.888	0.959	0.335828	0.729721	107.3	91.7	102.8	98.2	0		0
High	Q23978	Unconventional myosin ID	2.324	2	1	1	1	Myo31DF	0.977	1.095	0.961764	0.462078	99.8	95.1	98.4	106.6	0		0
High	Q9VW12	UPF0389 protein CG9231	13.631	20	2	32	2		1.029	1.016	0.684244	0.900325	102.5	107.8	95.1	94.7	0		0
Medium	Q9VL63	UPF0430 protein CG31712	1.588	2	1	3	1		0.697	1.483	0.00456616	0.00135363	135.2	94.3	68.7	101.9	0		0
High	Q9V595	Uroporphyrinogen decarboxylase	3.183	3	1	13	1	Urod	0.842	0.995	0.298145	0.961235	105.4	90	102	102.5	0		0
High	A1Z713	Vacuolar protein sorting-associated protein 13	57	5	12	68	12	Vps13	0.824	1.008	0.11904	0.955537	83	71.4	124.1	121.5	0		0
Low	Q9Y1I2	Vacuolar protein sorting-associated protein 33A	1.378	2	1	3	1	car	0.9	1.378	0.677514	0.0090829	97.2	91.1	89	122.7	0		0
High	Q9V3S9	Very long-chain-fatty-acid--CoA ligase bubblegum	19.416	10	4	21	4	bgm	0.959	1.108	0.813166	0.406142	119	111	71	98.9	0		0
High	P46461	Vesicle-fusing ATPase 1	287.919	58	40	652	25	comt	1.047	1.006	0.566542	0.964408	91.3	91.1	107.8	109.9	0		0
High	P54351	Vesicle-fusing ATPase 2	100.825	22	18	238	3	Nsf2	1.013	0.955	0.783936	0.702054	98.2	104.6	100.1	97.1	0		0
High	O17444	Vesicular acetylcholine transporter	30.532	11	5	76	5	VAChT	1.138	1.154	0.177119	0.246146	85.2	91.6	103.3	120	0		0
High	O46037	Vinculin	108.569	23	19	130	19	Vinc	1.153	1.068	0.140888	0.598223	93	107.4	95.8	103.7	0		0
High	P02843	Vitellogenin-1	311.218	71	25	702	24	Yp1	1.433	0.628	0.000473358	0.000146325	102.9	155.2	88.8	53.2	0		3	Phospho [Y171(100); S175(100); S421(99)]
High	P02844	Vitellogenin-2	260.335	58	19	809	18	Yp2	1.124	0.538	0.215122	4.15138e-07	113.5	122.3	106	58.1	0		0
High	P06607	Vitellogenin-3	319.063	77	28	1108	28	Yp3	1.466	0.592	0.000209118	1.93721e-05	104.2	155.5	88.1	52.1	0		0
High	Q94920	Voltage-dependent anion-selective channel	275.975	87	22	970	22	porin	0.984	1.075	0.998989	0.561386	103.8	99.3	95.4	101.5	0		0
High	P48602	V-type proton ATPase catalytic subunit A isoform 1	371.325	67	36	854	22	Vha68-1	0.888	1.012	0.340388	0.927555	100.6	93.1	104.3	102	0		0
High	Q27331	V-type proton ATPase catalytic subunit A isoform 2	322.11	63	35	834	21	Vha68-2	0.888	0.875	0.337124	0.275472	102.5	88.7	113.4	95.4	0		0
High	P31409	V-type proton ATPase subunit B	266.77	65	25	832	25	Vha55	0.927	0.974	0.579806	0.82778	90.7	84.3	113.6	111.5	0		0
High	Q9V7N5	V-type proton ATPase subunit C	107.656	24	18	299	18	Vha44	0.999	0.961	0.890746	0.738621	84.5	85	118.1	112.5	0		0
High	Q9V7D2	V-type proton ATPase subunit D 1	69.349	52	12	140	12	Vha36-1	0.992	1.023	0.938599	0.857958	110.6	106.6	90.1	92.6	0		0
High	Q9W4P5	V-type proton ATPase subunit d 1	99.781	37	10	221	10	VhaAC39-1	0.883	1.057	0.310162	0.653997	95.1	88.7	106.4	109.8	0		0
High	P54611	V-type proton ATPase subunit E	126.076	73	19	356	19	Vha26	1.088	0.962	0.350161	0.744415	86.7	90.8	115.9	106.6	0		0
High	Q24583	V-type proton ATPase subunit F 1	70.153	61	8	91	8	Vha14-1	0.933	0.979	0.617596	0.858568	93.6	88.6	108.7	109.1	0		0
High	Q9XZH6	V-type proton ATPase subunit G	41.331	47	5	111	5	Vha13	0.991	0.955	0.951043	0.704672	89.1	87.4	114.2	109.3	0		0
High	Q9V3J1	V-type proton ATPase subunit H	185.243	55	20	482	1	VhaSFD	1.182	0.969	0.173362	0.79068	81.4	90.9	114.3	113.4	0		0
High	Q7JR49	V-type proton ATPase subunit S1	6.599	3	1	12	1	VhaAC45	0.966	0.943	0.892859	0.629181	63.8	65.8	138.9	131.5	0		0
High	Q9VJG0	Xaa-Pro aminopeptidase ApepP	5.252	3	1	1	1	ApepP	100	0.954	1e-17	0.695583		51.9	189.3	158.8	0		0
High	P10351	Xanthine dehydrogenase	25.863	7	6	36	6	ry	0.836	0.854	0.176338	0.196115	124.2	114.7	94.8	66.3	0		0
High	Q7JWR9	Zinc finger CCCH domain-containing protein 15 homolog	8.876	8	3	8	3		0.849	0.846	0.390046	0.170773	207.2	70.2	79.5	43.1	0		0
High	A1Z9R4	Zinc finger protein 423 homolog	2.262	1	1	18	1	Oaz	0.931	0.801	0.752077	0.0696105	110.9	101.7	101.6	85.7	0		0
High	P41073	Zinc finger protein on ecdysone puffs	53.984	19	12	82	12	Pep	1.115	1.073	0.24502	0.569229	99.1	126.4	83.2	91.3	0		0
High	Q9VD26	Zinc finger protein-like 1 homolog	5.156	3	1	20	1		0.9	0.837	0.716363	0.144594	131.1	118.2	81.3	69.4	0		0
