# Supplementary material for: Axonal distribution of mitochondria maintains neuronal autophagy during aging via eIF2β
Source: eLife. 2026 Jan 26;13:RP95576. doi: 10.7554/eLife.95576 (PMC12834499; doi:10.7554/eLife.95576)
Supplement: Supplementary file 2. [file elife-95576-supp2.xlsx]

## Sheet: S2
Fly genotypes
Figure 1B, C	control RNAi	elav-Gal4/+;UAS-luciferase RNAi/+;+/+
	milton RNAi	elav-Gal4/UAS-milton RNAi v41508;+/+;+/+
	Miro RNAi	elav-Gal4/+;+/+;UAS-Miro RNAi/+
Figure 1E-H	control RNAi	elav-Gal4/+;gmr-Gal4/UAS-luciferase RNAi;+/+
	milton RNAi	elav-Gal4/UAS-milton RNAi v41508;gmr-Gal4/+;+/+
Figure 2	control RNAi	elav-Gal4/+;UAS-luciferase RNAi/+;+/+
	milton RNAi	elav-Gal4/UAS-milton RNAi v41508;+/+;+/+
Figure 3	control RNAi	elav-Gal4/+;UAS-luciferase RNAi/+;+/+
	milton RNAi	elav-Gal4/UAS-milton RNAi v41508;+/+;+/+
	control RNAi	elav-Gal4/+;+/+;UAS-luciferase B31603/+
	Pfk RNAi	elav-Gal4/+; UAS-Pfk RNAi B36782/+;+/+
Figure 4B-F	control RNAi	elav-Gal4/+;UAS-luciferase RNAi/+;+/+
	milton RNAi	elav-Gal4/UAS-milton RNAi v41508;+/+;+/+
Figure 4G	7, 21, 35, 49, 63 day-old	elav-Gal4/+; +/+;+/+
Figure 5A, B	control RNAi	elav-Gal4/+;UAS-luciferase RNAi/+;+/+
	milton RNAi	elav-Gal4/UAS-milton RNAi v41508;+/+;+/+
Figure 5D, 5E	control RNAi	elav-Gal4/+;UAS-luciferase RNAi/mito-GFP;+/+
	milton RNAi	elav-Gal4/UAS-milton RNAi v41508;+/mito-GFP;+/+
Figure 6	control RNAi	elav-Gal4/+;UAS-luciferase RNAi/mito-GFP;+/+
	milton RNAi	elav-Gal4/UAS-milton RNAi v41508;+/mito-GFP;+/+
Figure 7	control OE	elav-Gal4/Y;UAS-GFP/+;+/+
	eIF2β OE	elav-Gal4/Y;UAS-eIF2β/+;+/+
Figure 8A	control	w[1118]/Y:+/+;+/+
	eIF2β-/+	+/Y;+/+;eIF2βSAstopDsRed/TM6Tb
Figure 8B-D	milton RNAi	elav-Gal4/UAS-milton RNAi v41508
	milton RNAi in eIF2β-/+	elav-Gal4/UAS-milton RNAi v41508;;eIF2βSAstopDsRed/+
Figure S1	control RNAi	elav-Gal4/+;UAS-luciferase RNAi/+;+/+
	milton RNAi	elav-Gal4/UAS-milton RNAi v41508;+/+;+/+
Figure S2	control OE	+/+;gmr-Gal4/UAS-GFP;+/+
	eIF2β OE	+/+;gmr-Gal4/UAS-eIF2β;+/+
Figure S3A, B	control	w[1118]/Y:+/+;+/+
	eIF2β-/+	+/Y;+/+;eIF2βSAstopDsRed/TM6Tb
Figure S3C	milton RNAi	elav-Gal4/UAS-milton RNAi v41508
	milton RNAi in eIF2β-/+	elav-Gal4/UAS-milton RNAi v41508;;eIF2βSAstopDsRed/+
