# Supplementary figures and images for: Axonal distribution of mitochondria maintains neuronal autophagy during aging via eIF2β
Source: eLife journal article supplement (doi:10.7554/elife.95576), 2024-03-25

**Figure 2** Fig. 2A

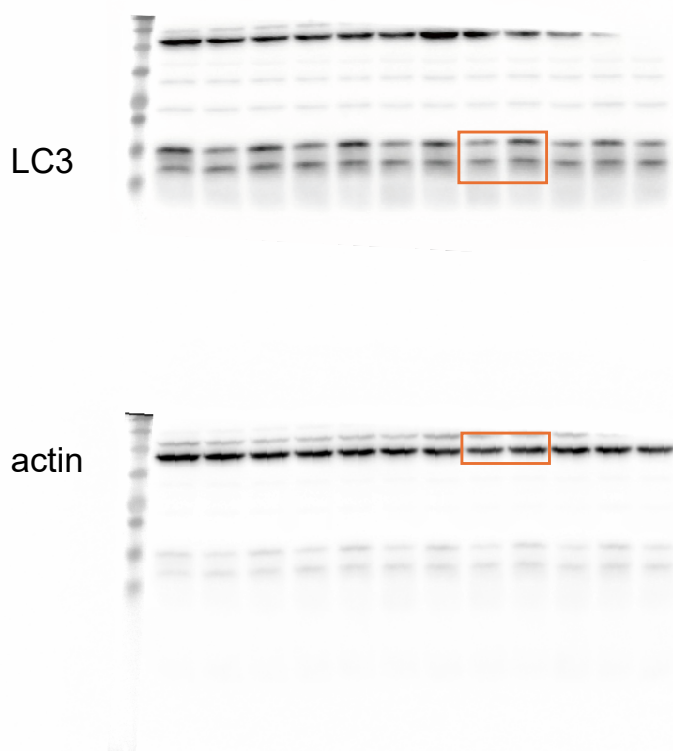

Fig. 2B

p62

actin

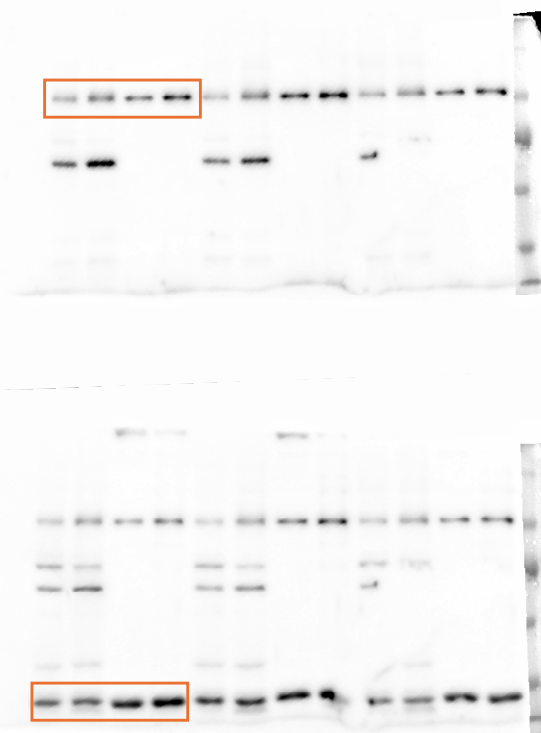

Fig. 2D

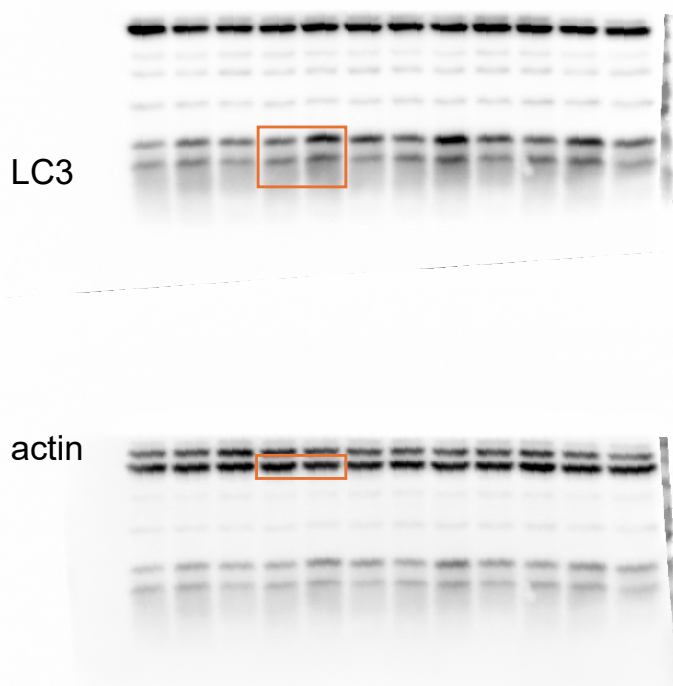

Fig. 2E

p62

actin

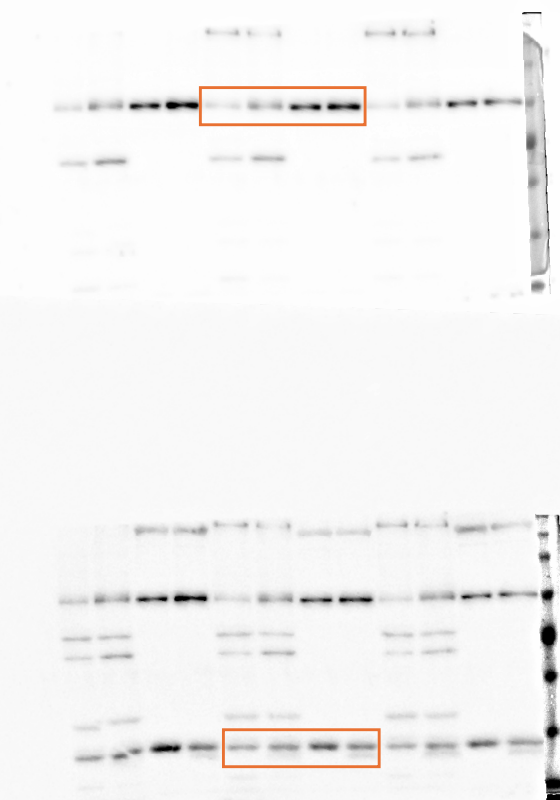

Supplement: fig2-data1 [file Figure 2_Source data 1.pdf › Figure 2_Source data 1.pdf]

**Figure 3** Fig. 3D

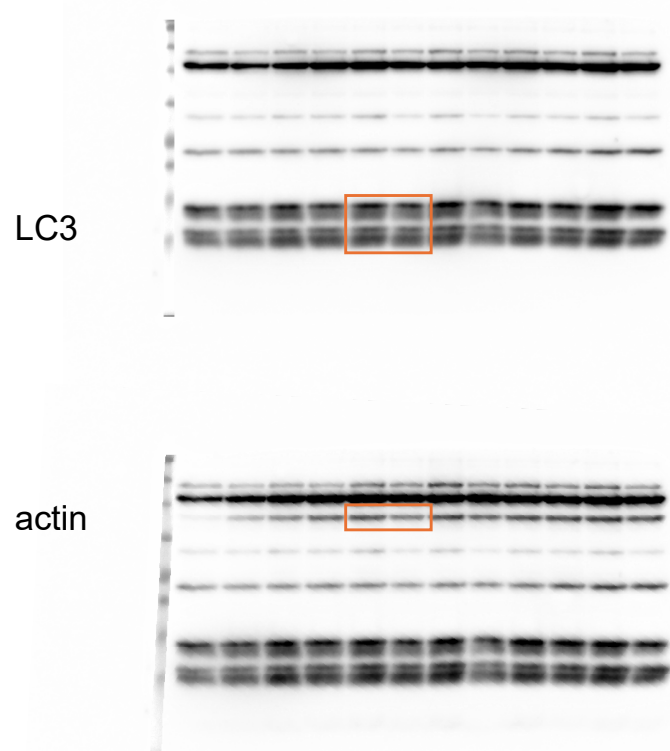

Fig. 3E

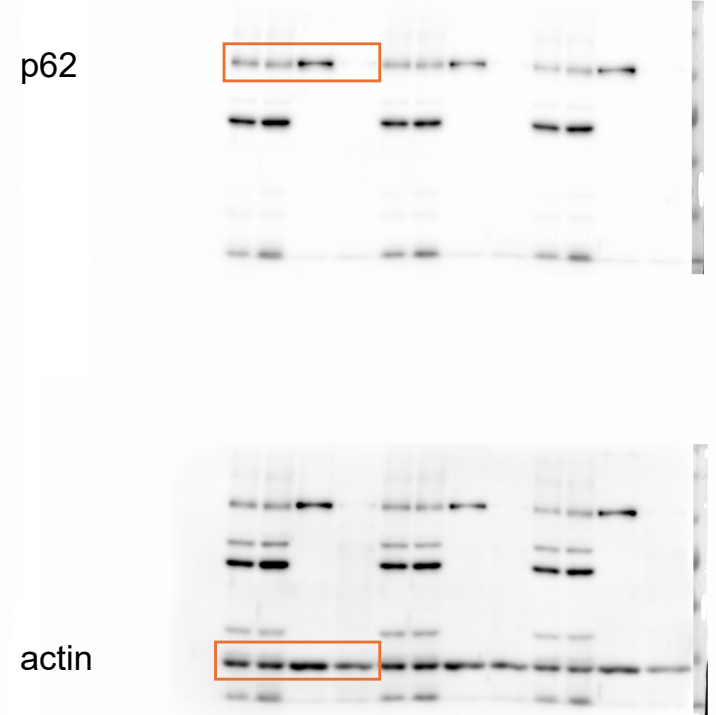

Supplement: fig3-data1 [file Figure 3_Source data 1.pdf › Figure 3_Source data 1.pdf]

**Figure 4** Fig. 4E

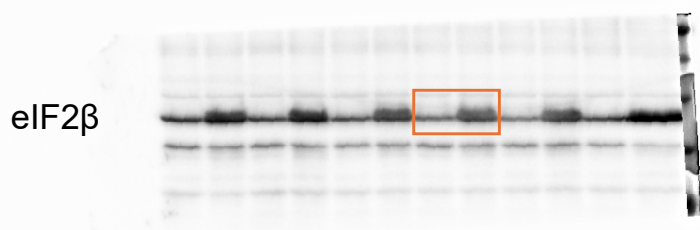

Fig. 4G

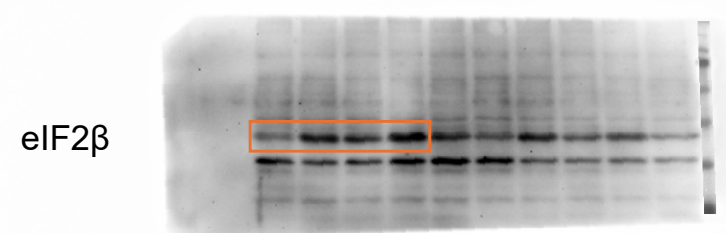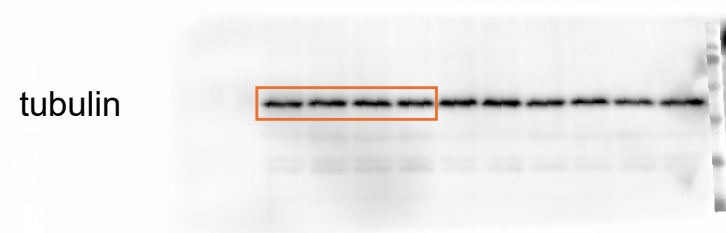

Supplement: fig4-data1 [file Figure 4_Source data 1.pdf › Figure 4_Source data 1.pdf]

**Figure 5** Fig. 5A

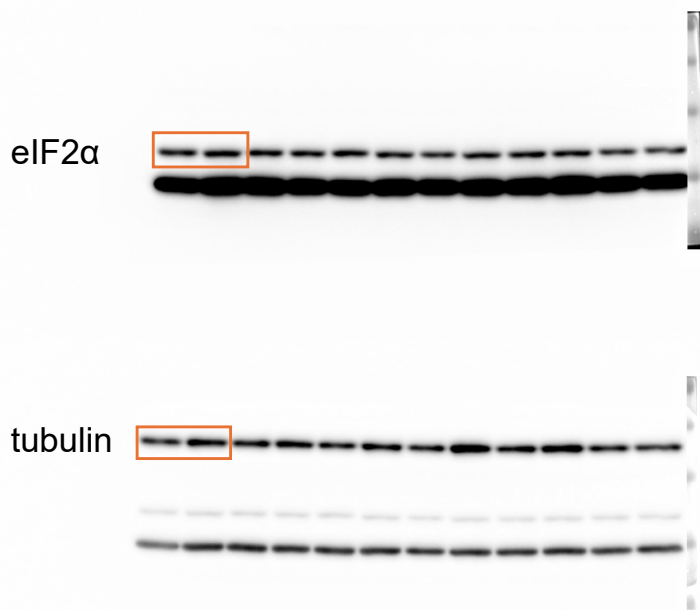

Fig. 5B

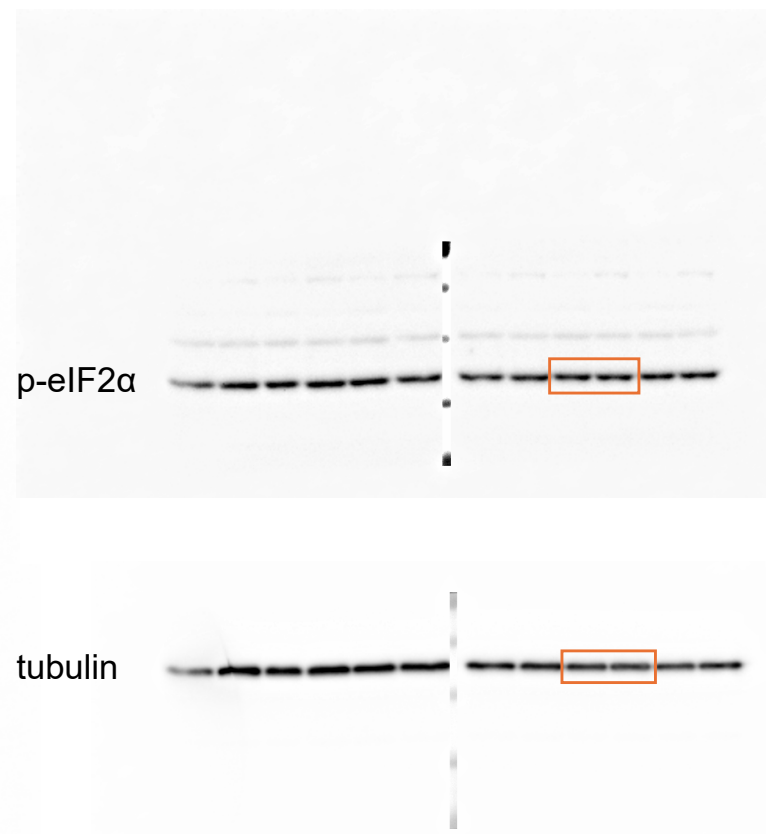

Supplement: fig5-data1 [file Figure 5_Source data 1.pdf › Figure 5_Source data 1.pdf]

# Figure 6

Fig. 6C

puromycin

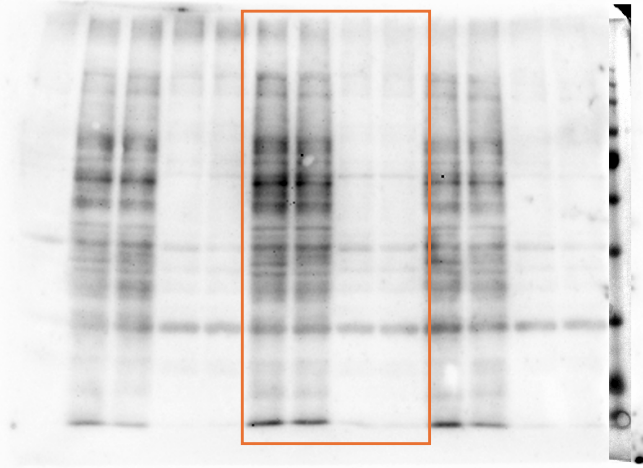

actin

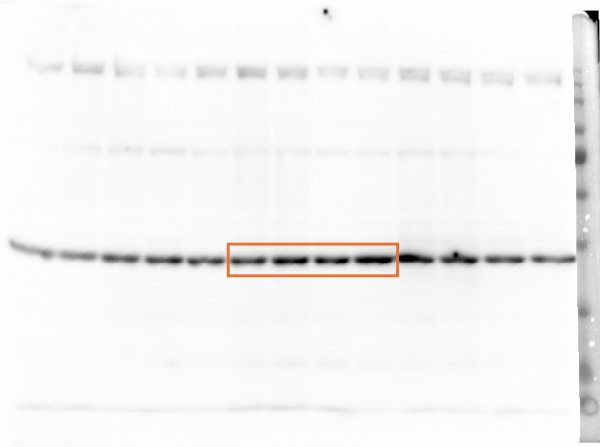

Supplement: fig6-data1 [file Figure 6_Source data 1.pdf › Figure 6_Source data 1.pdf]

**Figure 7** Fig. 7B

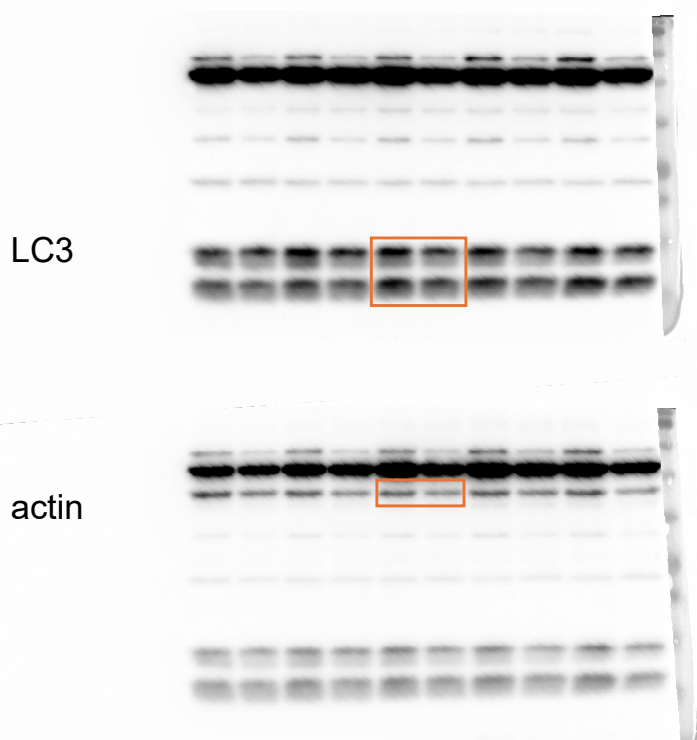

Fig. 7C

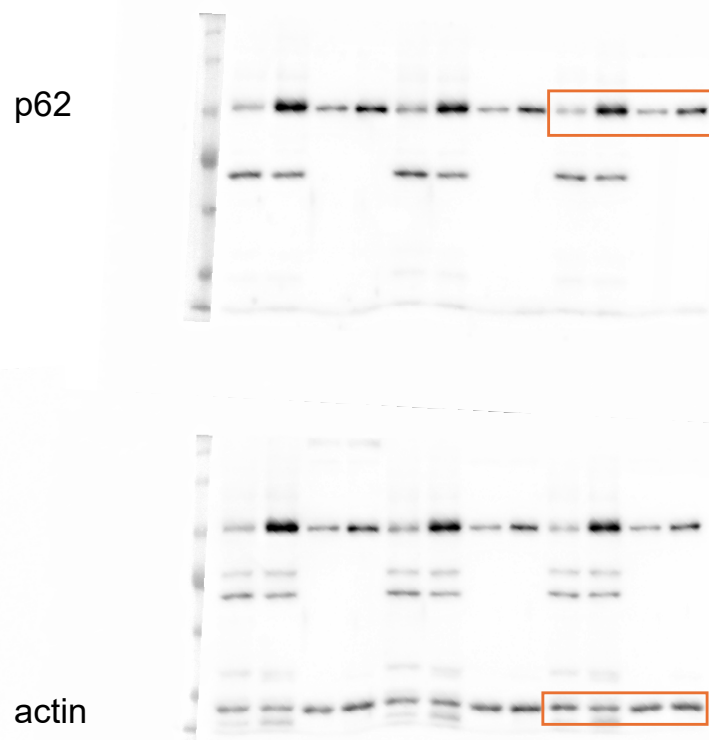

Fig. 7D

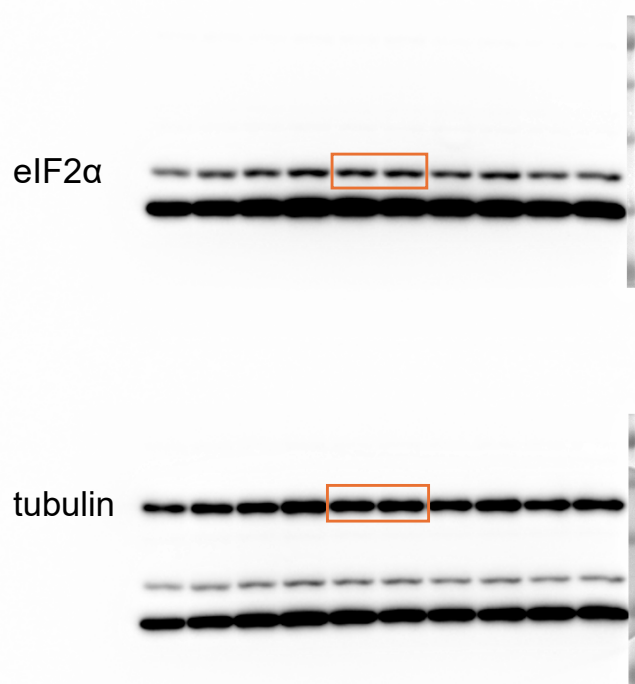

Fig. 7E

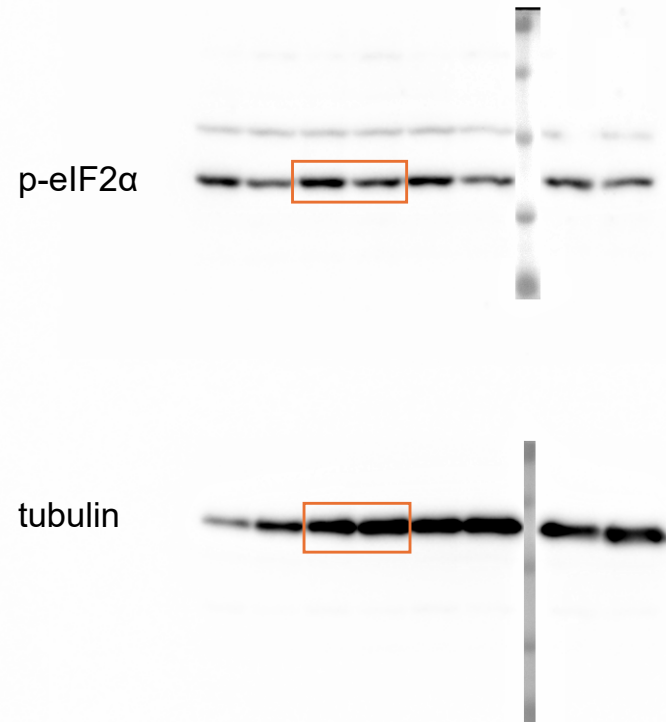

Supplement: fig7-data1 [file Figure 7_Source data 1.pdf › Figure 7_Source data 1.pdf]

**Figure 8** Fig. 8B

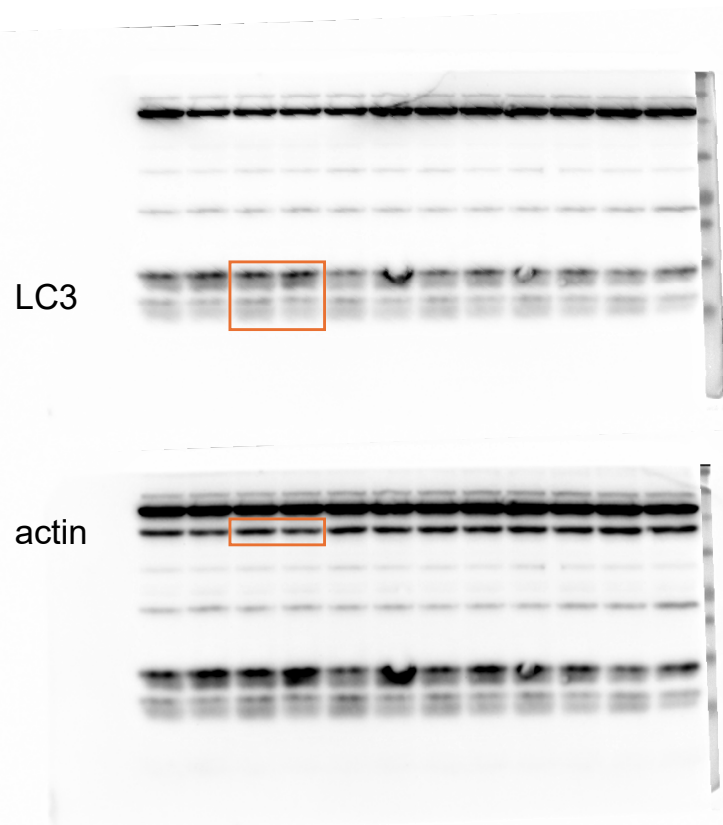

Fig. 8C

p62

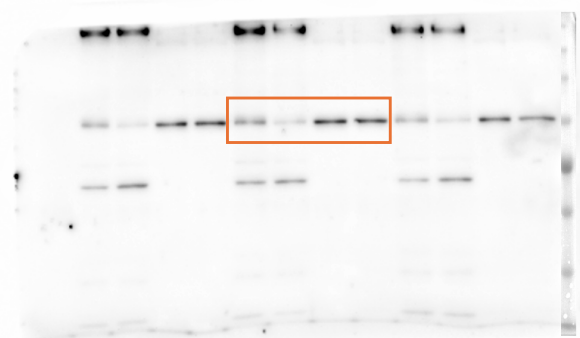

actin

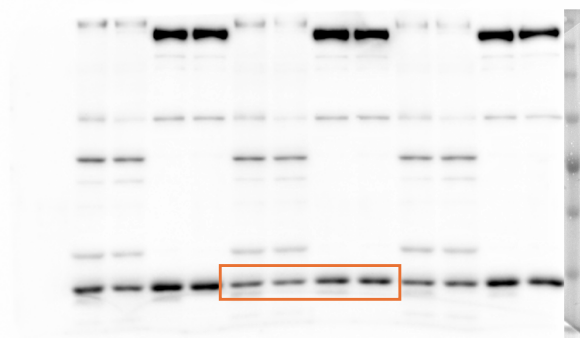

Supplement: fig8-data1 [file Figure 8_Source data 1.pdf › Figure 8_Source data 1.pdf]

**Figure 8** Fig. 8B

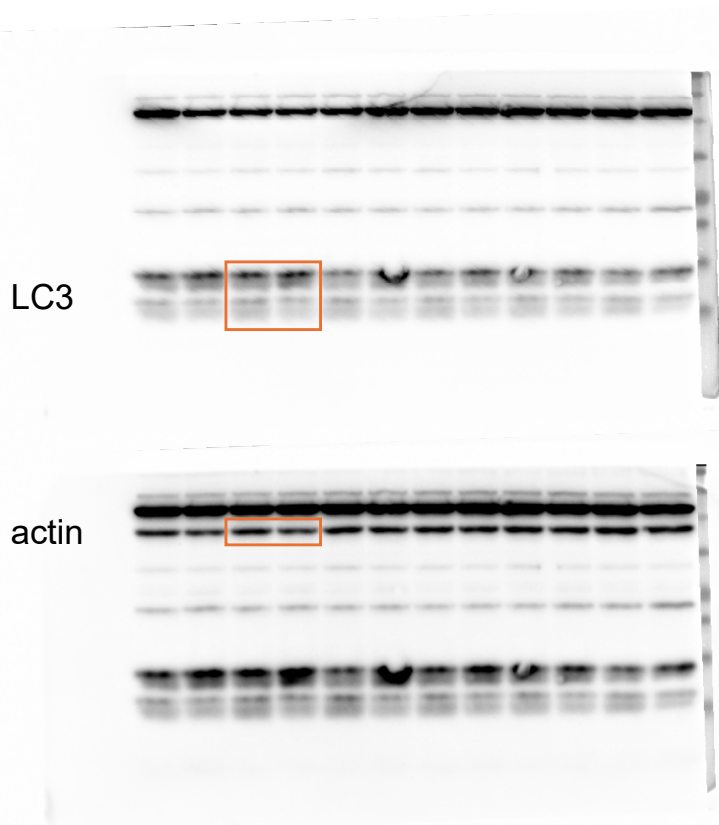

Fig. 8C

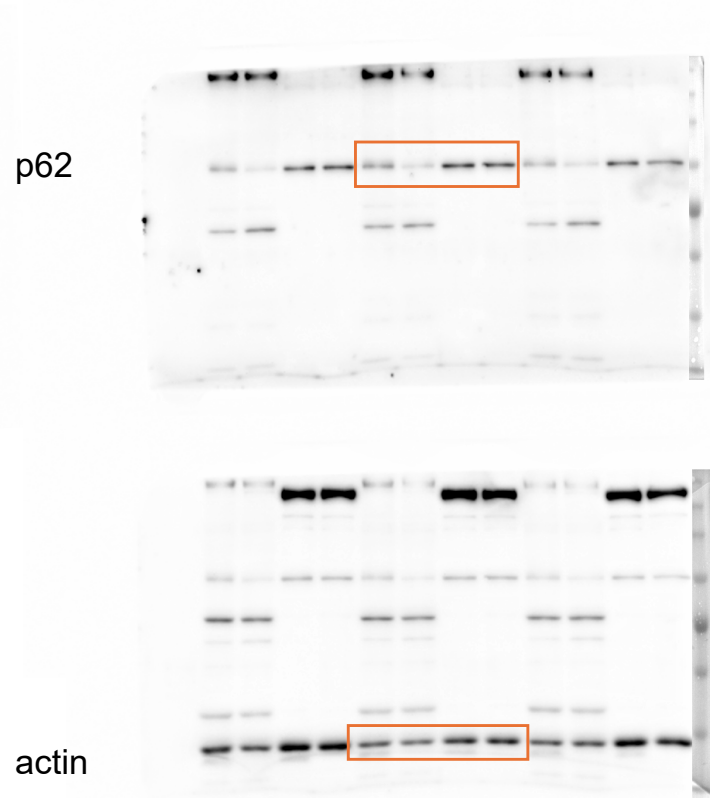

Supplement: fig8-figsupp1-data1 [file Supplemetal figure 3_Source data 1.pdf › Supplemetal figure 3_Source data 1.pdf]
